# Supplementary material for: Age of acquisition of 299 words in seven languages: American English, Czech, Gaelic, Lebanese Arabic, Malay, Persian and Western Armenian
Source: PLoS One. 2019 Aug 8;14(8):e0220611. doi: 10.1371/journal.pone.0220611 (PMC6687123; doi:10.1371/journal.pone.0220611)
Supplement: S1 Table — (XLSX) [file pone.0220611.s001.xlsx]

## Sheet: supplemental material AoA
word	Afrikaans	American English	Catalan	Czech	Danish	Dutch	English	Finnish	Gaelic	German	Greek	Hebrew	Hungarian	Icelandic	Irish	IsiXhosa	Italian	Lebanese Arabic	Lithuanian	Luxembourgish	Malay	Maltese	Persian	Polish	Russian	Serbian	Slovak	South African English	Spanish	Swedish	Turkish	Western Armenian
airplane		3.78261	4.15	2.88462	3.30435	3.95455	3.55242	1.83333	6.57143	3.2381		2.52381	3.52381	3.26087	3.65	5.5	4.31818		4.17857	2.77273	4.05405	4.2	3.90476		2.65714	4.72727	2.77778	3.57143	3.58824	3.17391	3.04762	2.58333
ant	3.21622	3.08696	3.1	3.34615	2.65217	2.95455	3.17339	2.04167	8.61905	2.80952	3.15152	2.90476	3.66667	4.5	5.29412	4.54167	3.08	2.59524	4.25	3.31818	4.09459	3.76923	3.14286	3.3125	3.22222	3.75758	2.90909	2.78049	3.22727	2.56522	2.84615	3.25
apple	2.83784	3.04348	2.5	2.19231	2.08696	2.45455	2.52419	1.66667	3.42857	1.80952	2.75	1.97619	2.6	2.6087	2.1	3.33333	2.2	1.97619	2.75	2.25	4.43243	3.18182	2.61905	2.65625	2.02778	3.30303	2.12121	2.28571	2.77273	2.30435	2.25641	2.16667
axe	4.40541	5.04348	5.4	4.38462	3.95652	5	5.57258	3.29167	7.42857	5.47619	5.30882	4.94444	5.19048	5.17391	5.7	5.72727	4.92	9.33333	4.57143	4.5	5.35135	8	5.47619	4.6875	4.16667	5.51515	5.33333	4.82927	5.40909	4.69565	4.41026
ball	2.59459	2.6087	2.55	2.30769	1.91304	1.80952	2.03226	1.21739	3.71429	2	2.13235	1.66667	2.19048	2.30435	2.25	3.28	2	1.69048	2.60714	2.04762	3.83784	3	2.30952	2.59375	1.76389	2.69697	2.12121	2.19048	2.59091	1.86957	1.97436	1.41667
balloon		3.65217	3.3	2.57692	2.56522	2.42857	2.93145	1.88889	4.90476	2.42857		1.85714	3.25	3.56522	3.15789	3.36364	2.8		3.39286	2.77273	4.06757	3.1875	2.90476		3.44444	3.21212	2.11111	2.61905	2.82353	2.65217	2.2381	2.33333
banana	3.13514	3.47826	2.95	2.30769	2.26087	2.45455	2.72984	1.83333	3.61905	2.04762	2.96667	1.61905	4.14286	3.04348	2.95	3.55556	2.64	1.88095	5.42857	2.47727	3.97297	3.18182	3.33333	3.0625	3.86111	3.60606	2.54545	2.54762	2.81818	2.30435	2.94872	1.91667
barrel	3.66667	5.3913	4.3	4.03846	3.77273	4	5.60976	4	6.28571	4.52381	4.6875	4.65	4.90476	4	4.26316	7.12	4.08	5	5.48148	4.47619	5.56757	6.45455	5.52381	4.65625	3.97222	5.27273	4.75758	6.07317	5.95238	3.91304	6.61538
basket	4.05405	4.3913	4.2	3.30769	3.6087	3.63636	4.04032	2.625	4.2381	3.42857	3.70968	3.33333	3.57143	4	4	6.59259	3.76	3.90476	4.46429	3	4.68919	4	4.04762	3.75	3.47222	4.69697	3.12121	3.43902	4.40909	3.65217	3.89474	4.58333
battery	4.89189	5	6	5.46154	4.34783	5.5	5.1371	3.29167	7.28571	4.7619	4.66176	5.27778	5.57143	5.3913	9.23529	6.04	5.2	4.28571	7.10714	4.5	6.02703	5.4375	4.57143	4.78125	3.94286	5.72727	4.60606	5	4.90909	4.26087	4.17949
bear	3.89189	3.30435	3.35	2.69231	3.08696	2.72727	2.77823	2.5	6.09524	2.38095	3.32353	2.57143	3.33333	4.08696	4.4	5.6	3	2.95238	3.32143	3.18182	5.25676	4.53846	3.47619	3.4375	2.36111	3.9697	2.66667	3.14286	3.36364	2.47826	3.10256	2.75
bed	2.67568	2.73913	2.15	2.34615	1.82609	1.90909	1.99194	1.25	3.14286	1.80952	2.68182	1.85714	2.52381	1.95652	1.9	3.48	2.24	2.11905	2.32143	2.04762	6.81081	2.58333	3.28571	2.3125	1.80556	2.9697	1.93939	2.33333	2.31818	1.95652	2.07692	2.16667
bell	4.02703	3.47826	3.05		3.13043	2.72727	3.40323	1.91667	4.95238	3.33333	3.54412	3.14286	3.57143	3.56522	4.65	5.52174	3.56	3	4.60714	3.5	5.21622	4.72727	3.47619	3.51613	3.22222	4.66667	3.48485	3.4878	4.19048	4	6.30769	2.66667
belt	5.05556	4.13043	4.4	3.88462	3.65217	4.09091	4.21545	3.20833	9.28571	3.95238	4.10294	4.33333	4.28571	3.82609	4	4.88462	4.2	5.30952	3.5	3.61905	5.91892	4.46154	4.14286	3.84375	3.51389	4.81818	4.15152	3.68293	4.5	4.34783	4.33333	3.70833
bicycle		3.52174	3	2.92308	2.69565	7.86364	3.66129	2	4	3.19048		2.90476	3.42857	3.04348	3	4.57143	3.2		3.64286	3.04545	4.54054	3.54545	3.47619		3.16667	3.9697	3	3.47619	3.64706	3.26087	3.33333	4.16667
bird	2.91892	3.17391	2.7	2.42308	2.17391	2.31818	2.40323	1.375	3.33333	2.14286	2.84375	2.19048	3	2.3913	2.2	4.375	2.64	2.28571	2.92857	2.40909	3.87838	3.38462	3.04762	2.53125	2.05556	3.36364	2.21212	2.42857	2.68182	2.17391	1.94872	1.95833
blackboard	2.91892	5.21739	3.85	4.61538	4.21739	4.54545	4.76423	4.41667	5.71429	4	4.32353	4.2381	4.71429	5.21739	4	5.88	4.08	3.42857	4.17857	3.95455	5.7027	4.4375	5.38095	4.875	5.27778	5.24242	5.18182	5.14634	3.77273	3.30435	5.94872	3.875
bone	3.51351	4	4	3.80769	2.04348	3.72727	4.02439	2.79167	4.38095	4.33333	4	3.95238	4.04762	3.65217	3.4	4.07692	3.64	4.61905	4.17857	3.27273	5.59459	5.75	4.09524	4.16129	3.38889	5.42424	4.45455	3.40476	4.27273	2.09091	4.64103	4.29167
boot	5.52778	3.91304	3.85	2.38462	2.69565	2.90909	3.31452	2.16667	4.19048	3	3.92647	3.71429	3.38095	2.43478	3.73684	5.33333	4.52	2.30952	2.42857	3	6.62162	11.3333	4.7619	5.65625	2.66667	4.21212	3.27273	3.78571	3.45455	3.3913	3.89744
bottle	2.89189	3.3913	3.3	2.76923	3.08696	2.40909	2.62097	1.75	2.90476	2.42857	3.16129	1.61905	3.66667	3.3913	2.6	3.19231	2.84	2.35714	4.10714	2.36364	4	3.76923	5.14286	2.96774	2.91429	4.12121	2.21212	2.38095	3.45455	2.73913	3.20513	2.625
broom	3.54054	4.43478	3.7	3.5	2.6087	3.81818	4.29032	3.33333	4	3.19048	3.08824	2.90476	3.52381	3.6087	2.8	4.64	3.32	3.78571	3.46429	3.95238	4.91892	3.64706	3.33333	3.5625	3.66667	4.21212	3.42424	3.2439	3.81818	4.56522	3.28205	3.79167
brush		3.78261	3.65	4.38462	3.18182	3.54545	3.125	1.83333	3.47619	3.09524		3.02381	4.28571	3.43478	3.6	5.04167	3.88		4	2.88636	4.43243	4.58333	4.66667		3.41667	3.93939	3.77778	3.04762	3.94118	3.91304	5.14286
bus	3.81081	3.65217	4.85	3.23077	2.73913	3	2.92339	2.5	3.42857	3.09524	4.57353	2.80952	3.52381	4.43478	2.6	4.95652	4.68	3.30952	3.92857	2.90909	4.16216	4.93333	4.47619	3.41935	2.75	4.15152	3.63636	3.47619	3.77273	2.65217	3.28205	4.66667
butterfly	3.97297	4.08696	3.35	2.92308	2.73913	3.31818	3.41129	1.95833	5.42857	2.71429	3.04545	2	3.47619	3.21739	2.9	4.875	3.16	3.40476	3.53571	3.09091	4.62162	3.33333	3.7619	3.03125	2.33333	3.78788	2.78788	3.07143	3.36364	2.86957	3.35897	2.54167
button	3.67568	4.08696	3.2	3.53846	3.17391	3.36364	3.27419	2.125	4.09524	2.95238	3.58824	3.38095	3.71429	3	3.2	5.28	3.4	3.57143	3.10714	2.70455	4.86486	4.58333	3.38095	3.375	2.97222	4.3125	2.81818	3.21951	3.5	3.26087	3.33333	3.79167
candle	3.67568	4.34783	4.2	3.5	3.95652	3.5	4.49194	2.41667	4.42857	2.95238	3.67647	3	4.14286	3.65217	3.4	4.84	3.92	2.97619	4.32143	3.15909	5.13514	4.6	3.66667	3.9375	3.47222	4.81818	3.66667	3.58537	4.52381	3.04348	3.38462	2.58333
cap			3.65		3.86957	2.90909	3.74194	1.66667		2.28571		2.2381	2.90476	2.3913	3.1	5.28	3.6		3.03571	2.40909	4.54054	3.92308			2.25	3.48485	1.77778	2.88095	3.58824	2.21739	5
car		2.95652	3.15	2.42308	2	2.2381	2.25	1.23529	3.71429	2.19048		2.54762	3.14286	2.30435	2.35	4.18519	2.8		3.07143	2.11364	3.86486	3.07692	2.95238		2.06944	3.60606	1.55556	2.54762	2.76471	1.86957	2.66667	2.75
carrot	3.18919	3.6087	3.25	2.88462	2.47826	3.22727	3.14516	1.83333	3.28571	2.9	3.17647	2.425	3	3.21739	2.94737	5.58333	2.68	3.19048	2.92857	3.14286	5.72973	4.15385	3.28571	3.09375	2.41429	4	2.66667	2.88095	3.5	2.78261	3.30769	2.79167
cat	2.72973	2.78261	2.7	2.15385	1.73913	2.36364	2.02419	1.30435	3	2.14286	2.30882	1.95238	2.61905	2.17391	1.85	3.79167	2.16	1.85714	2.25	2.33333	3.64865	3.16667	2.85714	2.3125	1.75714	2.90909	2.09091	2.42857	2.40909	1.86957	1.94872	1.625
chain		4.78261	4.65	4.57692	3.86957	3.68182	4.78862	3.94444	6.71429	3.42857		3	3.65	4.78261	4.8	5.42857	4.24		4.39286	3.04545	5.27027	6	4.61905		4.66667	5	4.55556	4.60976	5.88235	5	4.85714	5.29167
chair	2.91892	3.65217	2.7	2.53846	2.04348	2.13636	2.65323	1.375	4.80952	2.09524	2.72059	2.09524	2.71429	2.30435	2.7	3.92593	2.32	2.30952	2.57143	2.40909	4.47297	3.26667	3.33333	2.90625	1.95833	3.21212	2.21212	2.61905	2.72727	2.52174	2.94872	1.75
cheese	3.13514	3.73913	3.65	3.11538	2.6087	2.54545	3.15726	1.91667	3.38095	2.52381	3.11765	2	3.52381	2.65217	3	5.16	2.96	2.97619	3.64286	2.5		3.21429	3.04762	2.75	2.91667	3.72727	3.06061	2.7381	3.04545	2.43478	2.33333	2.54167
clock	4.94595	3.78261	5.65	3.19231	2.6087	3.36364	3.29435	1.79167	3.85714	3.14286	3.5	2.61905	3.66667	2.82609	2.7	4.88	3.6	3.80952	3.60714	3.06818	5.56757	3.8	3.61905	3.34375	2.77778	3.78788	3.0303	3.45238	3.90909	3.04348	3.23077	3.29167
cloud	3.13514	3.47826	2.8	2.73077	2.69565	3.2381	3.18548	2.33333	4.09524	2.57143	3.4697	3.09524	3.65	3.13043	3.15	6.64	2.92	4.2381	3.64286	2.77273	4.56757	4.71429	3.66667	2.9375	2.66667	3.42424	2.66667	3	2.90909	2.86957	2.92308	2.79167
comb	3.37838	4.26087	3.3	3.26923	3.08696	2.72727	3.97581	2.04167	4.66667	3.09524	3.41176	2.85714	2.95238	3.13043	3.35	3.82609	3.6	3.38095	3.17857	2.79545	4.43243	3.58333	3.04762	3.54839	2.5	4.09091	2.69697	3.425	3.5	3.21739	2.87179	2.66667
computer	7.94444	4.56522	10.85	5.84615	8.56522	5.5	5.27642	7.125	10.4286	7.04762	6.72727	5.625	10.4762	9.43478	8.5	9.44	6.8	6.7619	10.3704	7.81818	6.81081	9.28571	7.66667	6.09677	9.55556	6.30303	7.87879	6.87805	7.63636	9.17391	7.38462	5.70833
cow	3.10811	3.04348	2.95	2.65385	1.82609	2.13636	2.45968	1.83333	3.80952	2.04762	3	2.28571	3.14286	3.43478	1.9	4.58333	2.83333	3.07143	2.89286	2.22727	4.12162	3.9375	2.95238	2.58065	2.2	3.48485	2.69697	2.5	2.63636	2.21739	2.74359	2.33333
crocodile	4	4.43478	3.65	3.73077	3.6087	4.04545	4.10656	3.25	10.5714	3.52381	4.55882	3.78571	4.66667	4.3913	7.5	7.57143	3.4	5.38095	4.5	3.5	4.48649	5.6	5.38095	4.03125	3.02857	4.57576	4.60606	3.80952	4.04545	3.65217	4.82051	4.33333
cucumber	4.13514	5.21739	7.35	3.11538	2.69565	3.90909	4.53252	2.04167	13.619	2.71429	3.27941	2.07143	3.7619	4.34783	7.52632	6.17391	5.16	2.69048	3.32143	3.90476	5.35135	5.33333	2.95238	3.0625	2.27778	4.36364	3.30303	3.68293	4.90909	3	3	2.125
desk		4.26087	4.95	2.57692	4.26087	4.86364	4.16129	3.76471	4.57143	4.52381		4.7619	5.66667	4.13043	3.89474	5.95238	4.96		2.67857	4.80952	4.14865	6.33333	6		4.36111	5.66667	4.77778	4.29268	6	4.04348	2.52381	4.875
dog	2.64865	2.78261	2.4	2.07692	1.73913	2.04545	1.9879	1.43478	3.38095	1.95238	2.40909	1.64286	2.42857	2.3913	2	3.81481	2.04	2.19048	2.35714	2.22727	4.5	2.72727	3.28571	2.3125	1.70833	3	1.75758	2.07143	2.31818	2.08696	2	1.625
doll	2.81081	2.95652	2.4	2.57692	1.91304	1.90909	2.35887	1.25	4.42857	2.09524	2.45455	1.59524	2.09524	2.08696	2.7	3.32	2.4	2.11905	2.25	2.36364	4.32432	2.25	2.85714	2.51613	1.81944	3.06061	1.72727	2.38095	2.68182	2.3913	2.28205	1.95833
door	2.89189	3.30435	2.5	2.61538	2.34783	2.59091	2.61694	1.70833	3.38095	2	2.66667	2.35714	2.90476	2.69565	2.1	4.44444	2.4	2.07143	2.75	2.40909	4.08108	3.4	2.42857	2.71875	2.13889	3.30303	2.18182	2.57143	2.90909	2.52174	2.05128	1.875
dress		3.73913	2.9	2.96154	2.13043	3.18182	2.85484	1.61111	3.42857	2.90476		2.42857	3	2.69565	2.45	4.15385	4.2		3.28571	2.77273	4.89189	3.07692	3.7619		2.5	3.9697	2.44444	3.02381	2.82353	2.65217	2.90476	2.25
drum	4.91429	3.86957	4.2	3.46154	2.86957	3.13636	3.72581	3.04167	4.57143	2.95238	4.25	2.42857	3.85714	3.86957	4.15	6.32	4.28	4.85714	4.10714	3.27273	5.05405	4.38462	4.85714	3.9375	2.94444	5.81818	3.15152	3.45238	4.22727	3.34783	3.61538	3.70833
duck	3.24324	3.17391	3.5	2.92308	2.13043	2.54545	2.44355	3	4.38095	2.38095	3.01471	2.28571	3	3.04348	2.35	4.125	3.52	3.14286	3.64286	2.59091	6.64865	3.78571	3.52381	3.03125	2.58333	3.63636	2.30303	2.57143	2.90909	2.86957	3.30769	2.41667
dummy		4.47826	5.5	2	1.65217	2.86364	2.42742	1.05882	5.52381	1.75		1.69048	2.14286	2.47619	6.05556	3.95652	1.92		4.07692	2.2619	4.64865	2.64286	2.7619		1.80556	2.48485	1.33333	2.09756	2.52941	1.69565	2.42857	1.33333
ear	2.56757	2.86957	2.5	2.11538	1.91304	2	2.33871	1.33333	3.80952	2	2.5303	2.04762	2.61905	2.17391	2	4.5	2.56	2.14286	2.53571	2.11364	3.77027	2.92857	2.2381	2.375	1.76389	3	1.87879	2.14286	2.54545	1.91304	1.92308	1.79167
elephant	3.64865	4.30435	3.45	2.80769	2.78261	3.22727	3.44355	2.66667	8.47619	2.85714	3.61765	2.28571	3.57143	3.78261	3.65	4.73913	3.08	3.40476	3.71429	3.09091	4.55405	3.63636	3.71429	3.25	2.77778	3.81818	3.33333	3.07143	3.45455	3.04348	3.61538	3.16667
envelope	4.75676	5.3913	4.55	4.42308	4.78261	5.40909	5.08065	3.29167	7.61905	5.04762	4.72727	4.42857	3.71429	5.30435	5	6.78261	4.12	5.7619	5.17857	4.77273	6.48649	5.15385	5.61905	4.5	4.16667	5.78788	4.90909	5	4.54545	4.30435	4.92308
eye	2.67568	2.86957	2.25	2.11538	2.13043	2.04545	2.35081	1.25	3.47619	2	2.26471	1.88095	2.52381	2.08696	2	6.19048	2.32	2.14286	2.46429	2.45	3.59459	3.41667	2.2381	2.375	1.68056	2.87879	1.72727	2.14286	2.27273	1.86957	1.92308	1.70833
feather	3.86486	4.08696	4.45	4.11538	2.86957	3.59091	4.06855	3.375	4.47619	3.52381	3.86364	4.09524	4.09524	4.13043	3.55	5.14815	4.12	5	4.14815	3.59091	5.05405	4.69231	3.47619	3.75	3.91667	5.45455	4.24242	3.40476	4.95455	3.73913	4.07692	4.75
fish	3.05405	3.26087	2.85	2.61538	2.21739	2.36364	2.45161	1.70833	2.95238	2.47619	2.90909	2.09524	3.42857	2.6087	2.45	5.875	2.6	2.59524	3.17857	2.63636	4.14865	3.41667	2.80952	2.9375	2.38889	3.75758	2.60606	2.60976	3.40909	2.43478	2.48718	2.29167
flag	4.45946	3.82609	5.2	4.84615	2.95652	3.81818	4.37903	2.5	5.61905	3.61905	4.16176	3.28571	3.7619	3.52174	4.45	5.52381	4.24	3.88095	4.82143	4.31818	5.67568	4.75	5	4.84375	4.02778	5.54545	5.84848	3.97561	5.09091	3.47826	3.82051	3.79167
flower	2.75676	3.3913	2.65	2.69231	2.47826	2.22727	2.74597	1.3913	3.7619	1.90476	2.43939	2.2381	2.7619	2.34783	2.4	4.48	2.2	3.11905	2.75	2.43182	4.05405	3.18182	2.66667	2.46875	2.05556	2.9697	1.90909	2.47619	2.68182	2.21739	2.30769	2.29167
fly		3.30435	3.25	2.80769	2.3913	3	3.15726	1.94444	3.85714	3.04762		3.05	3.14286	2.56522	4.15	3.95833	3.12	3.2381	2.89286	2.29545	4.78378	4	3.66667		2.36111	3.69697	2.22222	2.65854	3.88235	2.34783	3.04762	3.33333
fork	2.97297	3.13043	2.6	2.76923	2.17391	2.63636	2.79268	2	3.61905	2.57143	2.85294	2.57143	3.2381	2.56522	2.3	4.45455	2.96	2.90476	3.32143	2.56818	6.48649	3.53333	3.2381	3.0625	2.58333	3.66667	2.78788	2.85714	3	2.95652	2.25641	2.625
frog	3.35135	3.52174	3.6	2.76923	2.68182	3.13636	2.85484	2.375	7.2381	2.7619	3.32353	2.85714	2.90476	4.04545	2.55	4.65217	2.96	4.33333	3	2.90909	4.14865	4.90909	3.66667	3.03125	2.63889	4.0303	2.45455	2.97619	3.40909	2.73913	3.48718	3.625
frying pan		3.86957	4.1	4.26923	3.56522	4.68182	5.18548	2.72222		3.25		3.71429	5.04762	4.08696	4.94737	6.90909	4.44		3.89286	3.27273		4.54545	4.85714		3.61111	4.72727	4	4	4.70588	3.86957	4.2381	5.83333
gate	3.27027	4.17391	7.15	4.23077	3.43478	3.18182	3.39919	3.125	4	3.38095	5.42647	3.7619	3.47619	4.17391	2.95	4.83333	3.4	4.80952	4.10714	3.54545	5	6	2.42857	4.03125	3.47222	4.69697	3.60606	3.38095	2.77273	4.3913	2.10256
giraffe	4.56757	4.17391	4.1	3.23077	2.86957	3.9	3.89113	3.16667	8.85714	3.04762	4.75758	2.80952	3.57143	4.21739	6.89474	6.29167	3.72	5.19048	4.71429	3.29545	5.08108	4.8125	4.57143	3.5625	3.13889	4.0303	3.78788	3.42857	3.59091	3.6087	4.84615	5.25
glass	3.10811	4.08696	2.5	3.42308	2.6087	3.09091	3.48387	1.875	4.04762	2.47619	2.57812	2.04762	2.47619	2.21739	2.45	4.125	2.36	2.19048	3.71429	2.31818	5.21622	3.3	2.7619	3.22581	2.57143	3.18182	2.27273	3.19048	2.59091	2.69565	2.25641
glasses	3.51351	4.34783	3.7	3.46154	2.95652	2.86364	3.81452	2.79167	4.38095	2.95238	3.54412	2.90476	4.14286	3.5	4.05	5.75	3.2	3.04762	3.85714	2.79545	7.35135	4.23077	3.61905	3.21875	2.94444	4.15152	3.12121	3.56098	3.63636	3.86957	3.26316	2.58333
goat	3.56757	4	3.95	2.80769	3	3	3.375	3.86957	5.09524	3	3.31818	3.47619	3.80952	4.13043	3.55	4.51852	3.76	4.54762	3.71429	3.18182	6.54054	6.69231	3.71429	3.59375	2.72857	3.69697	2.72727	3.14286	3.86364	3.65217	3.79487	4.125
guitar	4.7027	4.82609	5	4.07692	3.45455	4.45455	4.70968	2.95833	5.85714	4.33333	4.60294	3.95238	4.7619	4	5.6	7.09091	4.52	4.61905	4.96429	3.63636	4.67568	4.46154	7.66667	4.25	3.97222	5.09091	4.54545	4.21951	4.77273	3.78261	5.12821	4.70833
gun		4.56522	5.25	4.57692	4.95652	4.95455	4.88618	2.77778	5.2381	4.47619		5.73684	4.57143	4.13043	3.8	7.04348	4		5.60714	4.45455	6.08108		4.09524		4.34286	5.36364	5.66667	4.175	5.70588	4.6087	4.80952	4.375
hat	3.13514	3	3.4	3.42308	2.56522	3.18182	2.45161	1.875	3.66667	2.90476	3.13235	2.28571	4.04762	3.30435	2.35	5.28	2.76	3.14286	4.7037	2.63636	4.54054	3.73333	2.95238	3.9375	3.47222	4.42424	3.78788	3.33333	4.27273	2.78261	2.74359	2.16667
heart	3.81081	3.73913	4.2	3.30769	3.30435	3.90909	3.82787	2.875	4.47619	3	3.77273	3.52381	3.57143	3.45455	3.1	6.07407	3.36	4.35714	3.89286	3	5.91892	4.07143	4.71429	3.3125	3.91667	3.81818	3.39394	3.30952	4.09091	3.04348	4.28205	3.95833
helicopter	4.89189	5.30435	6.4	4.26923	4.43478	4.54545	4.33065	3.125	5.47619	4.04762	4.63235	4.75	4.5	4.82609	5.1	6.04167	4.52	5.47619	5.42857	3.90909	3.41892	5.14286	5.09524	4.625	3.66667	5.72727	5.06061	4.14634	4.63636	4.65217	4.64103	5.29167
Hen		3.82609	3.15	2.65385	2.3913	2.22727	3.39919	2.11111	3.61905	2.28571		2.52381	3.25	2.78261	2.85	5.91667	2.68		2.96429	2.54545	3.83784	3.36364	3.2381		2.33333	3.75758	2.22222	2.83333	3.47059	3.04348	2.42857	2.375
horse	3.21622	3.47826	3.4	2.61538	2.21739	2.68182	2.87097	1.78261	3.19048	2.66667	3.28125	2.57143	3.14286	2.82609	2.3	5.13636	2.84	3.57143	3	2.63636	4.55405	3	3.38095	2.75	2.37143	3.78788	2.90909	2.64286	3.40909	2.56522	2.61538	2.66667
house	2.72973	3.26087	2.2	2.38462	1.82609	1.95455	2.64516	1.54167	3.38095	1.90476	2.32353	1.85714	2.57143	2.26087	2.05	3.96296	2	2.14286	2.60714	2.11364	3.86486	3.38462	2.57143	2.35484	1.9	3.06061	1.9697	2.57143	2.45455	2.04348	2.23077	1.75
iron	4.16216	4.86957	4.1	4.57692	4.34783	5.42857	4.62903	3.625	4.90476	4.33333	4.28788	4.28571	4.2381	4.3913	4.35	5.51852	4.56	4.42857	4.35714	3.77273	6.89189	5.07143	4.09524	4.45161	3.47222	5.24242	4.18182	3.87805	5	4.34783	3.69231	4.5
kangaroo	6	4.91304		3.80769	3.69565	4.4	4.68145	3.45833	6.7619	3.7619	4.35938	4.2381	5.04762	4.65217	5.95	7.34783	4.28	6.14286	5.18519	4.45455	5.72973	5.63636	5.66667	4.125	3.97222	5	4.90909	4.14634	4.77273	4.78261	5.55263
key	3.62162	3.6087	3.2	3.15385	3.08696	3.68182	3.56452	2.5	4.71429	2.57143	3.57353	3.61905	3.71429	3.78261	3.25	4.68	3.16	3.04762	3.96429	3.20455	5.13514	4.25	4.14286	3.34375	3	4.33333	3.18182	2.88095	3.86364	2.95652	3.4359	2.70833
knife	2.94595	4.04348	3.05	2.96154	2.3913	2.36364	3.32258	2	3.52381	2.66667	3.35294	2.85714	3.52381	2.78261	2.95	4.2	3.36	3.04762	3.5	2.34091	5.04054	3.58333	3.42857	3.0625	3.08333	3.90909	2.78788	3.02381	3.40909	2.82609	3	2.75
ladder	4.21622	4.3913	3.15	5.76923	3.3913	3.86364	4.44355	2.91667	4.42857	3.47619	3.22727	3.38095	3.2381	3.31818	3.5	5.70833	3	4.45238	4.53571	3.31818	4.54054	4.66667	4.38095	3.8125	2.72222	5.06061	4.06061	3.78049	3.45455	3.43478	2.76923
lamp	3.75676	4.04348	2.9	3.30769	2.82609	2.86364	3.89516	1.34783	4.28571	2.42857	4.72059	3.19048	3	3.21739	3.05	4.13043	4.04	5.14286	3.03571	2.56818	4.62162	4.72727	7	3.21875	2.38571	3.87879	2.57576	3.65854	4	1.86957	2.61538	5.54167
leaf	3	3.34783	2.95	3.26923	3.04545	3.40909	3.16935	2.20833	4.42857	2.2381	3.34375	2.61905	3.55	4.26087	2.95	5.17391	2.84	2.66667	3.07143	3	7.21622	3.66667	3.33333	3.09375	3.05556	3.72727	3.57576	3.04762	3.59091	2.91304	3.12821	3.29167
leg	2.83784	3	2.4	2.26923	2.17391	2.40909	2.29032	1.29167	2.95238	2.19048	2.25	1.92857	2.42857	4.91304	2.05	3.92	2.4	2.33333	2.35714	2.31818	4.27027	6.15385	2.19048	2.3125	1.80556	2.75758	1.72727	2.19048	2.81818	2.30435	2.53846	1.83333
lemon	4.05405	4.13043	3.2	3.19231	3.30435	4.36364	3.82258	3.08333	8.71429	3.04762	3.18182	2.7619	3.66667	4.34783	7.2	5.65217	3.2	3.85714	4.21429	3.22727	6.7027	3.81818	3.71429	3.59375	3.22222	4.33333	3.27273	3.45238	3.31818	3.34783	3.02564	3.41667
lighter	6.22857	6.13043	6.2	5.53846	4.77273	6.09091	5.95161	6	12.7619	4.47619	4.86765	5.35294	5.5	4.91304	6.33333	6.15385	5.08	5.14286	6.85714	4.95238	7.05405	6.41176	5.57143	5.46875	5.6	6.09091	6.12121	5.14634	6.63636	4.95652	3.89744
lion	3.40541	3.43478	3.5	2.88462	2.82609	3.54545	2.9187	2.70833	4.57143	2.61905	3.22059	2.42857	3.33333	3.30435	3.95	5.83333	2.84	3.90476	3.96429	3.38636	4.60811	4.21429	2.85714	2.96875	3.08333	3.90909	3.66667	2.88095	3.31818	3.17391	3.76923	2.95833
lipstick	5.54054	5.21739	5.25	5.30769	4.34783	4.77273	4.93145	3.70833		4.7619	4.27273	3.90476	4.66667	4.30435	8	7.15789	4.56	4.78571	5.03571	4.33333	6.94595	4.54545	5.85714	4.96875	4.33333	4.87879	4.60606	3.78049	5.45455	4.82609	4.82051
match	3.83784	4.82609	6.35	4.23077	3.95652	4.45455	4.81452	3.08333	5	4.19048	4.25	3.71429	4.2381	4.26087	6.6	5.54545	4.96	5.04762	4.17857	3.81818	5.67568	4.41667	4.04762	3.875	3.44444	5.21212	4.24242	4.04878	5.13636	3.91304	3.53846	4.54167
monkey	3.16216	3.6087	4	2.88462	2.47826	2.72727	2.96774	2.54167	4.2381	2.66667	3.95588	2.5	3.19048	3.34783	3.65	4.83333	2.96	4	4.75	3	4.13514	3.1	3.80952	3.375	3.16667	3.81818	3.51515	2.88095	3.54545	2.56522	3.71795	2.70833
moon	2.91892	3.30435	2.65	3.5	2.82609	2.27273	2.71371	1.83333	3.7619	2	3.29412	2.66667	3.33333	3.04348	3.4	5.56522	2.72	3.33333	3.21429	2.93182	4.54054	3.38462	3.09524	3.21875	2.69444	3.81818	2.9697	2.82927	3.22727	2.69565	2.74359	2.625
motorbike		5.3913	5.1	3.69231	3.91304	4.52941	4.68548	2.66667	5.95238	3.90476		3.42857	4.19048	4.65217	6.1	5.36364	3		4.64286	3.68182	5.24324	4.07143	5		3.94444	5.15152	3.44444	4.2619	5.125	4.56522	4.33333
mouse	3.37838	3.6087	3.3	2.57692	2.17391	2.59091	2.90726	1.91667	3.66667	2	3.20588	2.52381	3.14286	2.73913	2.35	4.84	2.88	3.42857	3	2.59091	4.51351	3.86667	3.42857	3.125	2.52778	3.57576	2.60606	2.90476	3.45455	3.08696	3	2.5
mushroom	4.7027	5.47826	4.3	5.46154	4.73913	5.63636	4.69355	2.66667	8.7619	3.33333	4.66176	3.7619	3.90476	5.13043	5.7	6.52174	3.64	6.19048	3.67857	3.40909	5.7027	7.75	5.95238	4.21875	2.86111	4.69697	4.36364	3.78049	5.11111	3.47826	4.69231	5.875
needle	4.10811	5.21739	3.95	4.07692	3.17391	4.63636	5.06452	2.83333	5.52381	4.14286	5.15625	4.14286	4.38095	3.95652	4.4	5.25	4.32	4.61905	3.92857	3.38636	3.5	4.64706	3.80952	4	3.63889	4.48485	4	4.04878	4.31818	3.65217	5.23077	4.16667
nest	3.72973	4.04348	3.65	4	3.13043	3.86364	3.82927	2.70833	4.38095	3.09524	4.22059	3.52381	4.19048	4.21739	3.15	6.375	3.8	5	4.39286	3.27273	5.59459	5.45455	4.61905	4.40625	3.66667	4.72727	3.90909	3.5122	4.40909	4.26087	4.84615	5
newspaper		5.04348	4.4	3.88462	3	3.90909	4.75806	3.05556	5.2381	3.7619		3.75	4.19048	5.26087	5.35	4.20833	4.36		4.10714	3.40909	5.64865	4.90909	5.19048		3.47222	4.60606	4	4.11905	5.05882	3.30435	3.61905	5.54167
nose	2.56757	2.86957	2.2	1.96154	2.17391	2.13636	2.25806	1.29167	3.33333	1.61905	2.36765	1.85714	2.52381	1.82609	2.05	4.03704	2.12	2.09524	2.39286	2.15909	3.48649	3.16667	3.14286	2.29032	1.65278	2.69697	1.75758	1.97619	2.68182	1.82609	1.87179	1.70833
onion	3.89189	4.78261	3.6	3.38462	3.30435	4	4.33065	2.625	4.28571	3.66667	4.25758	3.52381	4	4.3913	2.9	4.85185	3.88	4.42857	3.78571	3.61364	5.51351	4.76923	3.61905	3.5	2.66667	4.27273	3.45455	3.90244	4.31818	3.04348	3.4359	4.04167
orange	3.10811	3.65217	2.8	3	2.52174	3.54545	2.8871	2.29167	3.85714	3.05	3	2.5	3.9	2.91304	2.6	4.81818	2.92	3.28571	4.14286	2.5	4.24324	3.36364	3.28571	3.28125	3.02778	3.90909	3.30303	2.80952	2.81818	2.73913	2.71795	2.29167
owl	3.89189	3.34783	4.25	3.42308	3.26087	3.86364	3.48387	2.66667	4.52381	3.57143	3.77273	4.47619	3.57143	4.04348	7.21053	8.04	4.4	6.09524	4.17857	3.85714	6.02703	5.83333	4.90476	3.5	3.25	4.75758	3.21212	3.71429	4.54545	3.69565	5.4359
paintbrush	4.32432	4.73913	4.5	3.76923	3.43478	3.81818	3.93548	3.25	4.80952	3.42857	3.94118	4.14286	4.14286	4.6087	4.8	6.11111	3.84	5	4.42857	3.36364	5.10811	5.1	5.80952	3.6875	3.61111	3.9697	4.0303	3.69048	5.47619	3.17391	5	3.41667
pear	3.10811	4.04348	2.85	2.73077	2.52174	2.77273	3.66935	2.79167	5.14286	2.90476	3.22727	2.80952	3.28571	3.69565	6.52632	4.68	2.52	3.90476	3.60714	4.27273	6.62162	4	3.66667	3.19355	2.77778	3.72727	2.81818	3.42857	2.90909	2.69565	2.87179	2.875
pen	3.37838	3.6087	5.25	4.42308	3.73913	2.81818	3.1371	1.91667	4	2.28571	4.09091	3.61905	3.90476	3.47826	3.3	5.6	3.44	2.57143	5.62963	3.36364	4.51351	4.94118	4.66667	3.875	3.08333	4.69697	3.66667	3.39024	4.66667	4.17391	5.69231	4.75
pencil	3.62162	3.69565	3.15	2.96154	2.91304	3.09091	3.27419	3.66667	3.71429	3.33333	3.18182	3.33333	3.33333	3.69565	3.4	4.88462	3.2	3.33333	3.64286	3.27273	4.60811	3.66667	3.09524	3.59375	2.69444	3.66667	3.06061	3.5	3.27273	2.86957	4.33333	2.33333
penguin	4.72973	4.56522	4.2	3.76923	3.65217	4.95238	3.97177	3.45833	11.619	3.33333	4.12121	3.90476	4.09524	4.86957	6.94444	5.8	3.8	3.85714	4.89286	3.95455	6.67568	4.54545	5.38095	4.15625	4.19444	4.78788	5.09091	3.73171	4.63636	4	5.5641
pineapple		4.82609	3.75	4.07692	4	5.04545	4.77419	3.22222	12.6667	4.25		4.55	4.71429	5.3913	6.36842	4.88	4.68		5.14815	3.77273	5.12162	5.61538	6.09524		4.68571	5.12121	4.77778	4.12195	4.17647	3.82609	9.04762	6.41667
pizza	6.2973	3.65217	8.5	6.15385	5.34783	5	3.95122	5.26087	10.4762	4	4.5	3.30556	9.14286	9.17391	7.21053	7.05	3.16	4.33333	8.96296	4.84091	7.75676	6	6	5	8.57143	5.69697	7.90909	5.7381	5.95455	6.52174	6.61538	3
postman	4.51351	4.73913	4.4	4.38462	3.3913	4.36364	3.80645	3.75	3.95238	4.42857	4.85294	4.38095	4	3.95652	2.9	6.42308	4.28	6.61905	4.85714	3.56818	5.93243	6.08333		4.09677	3.94444	5.45455	4.21212	3.925	5.04545	4.52174	4.23077	8.04167
rabbit	3.43243	3.13043	3.15	2.84615	2.52174	2.72727	2.625	2.79167	5.04762	2.09524	3.02941	2.52381	3.2381	4	2.45	6.75	2.76	3.11905	2.78571	3.13636	4.66216	3.46154	3.28571	3.375	2.875	3.51515	2.66667	2.95238	3.09091	2.82609	2.79487	2.41667
racket	5	5.86957	4.7	4.69231	5	5.54545	5.10484	4.33333	6.7619	4.4	5.66176	5.88235	5.38095	6.21739	4.6	7	4.92	5.28571	5.5	4.66667	6.2973	8.25	6.19048	4.65625	5.08571	5.42424	5.42424	5.175	5	5.08696	5.76923
rainbow		4.26087	4.9	3.23077	3.95652	4.09091	3.45161	2.72222	4.80952	3.66667		3.57143	4.66667	3.78261	6.15	8.7	3.92		4.32143	3.77273	5.33784	5.54545	4.95238		3.25	4.60606	3	3.30952	4.05882	3.56522	4.19048	5
roof	3.08108	4.3913	4	3.57692	2.91304	3.22727	3.80645	2.16667	3.95238	2.90476	5.21212	3.09524	3.85714	3.69565	3.85	5.86957	3.4	5.42857	3.64286	2.90909	5.7027	4.07143	4.52381	3.54839	3.05556	4.54545	3.84848	3.45238	4.63636	3.08696	4.33333
ruler	5.05405	4.95652	4.7	4.84615	4.34783	5.04545	4.23387	4.58333	5.14286	4.71429	4.63235	4.33333	5.57143	5.13043	4.52632	5.43478	4.52	3.83333	5.07143	4.13636	4.97297	4.46667	4.71429	5.03125	4.5	5.27273	5.39394	4.43902	5	4.26087	5.25641	4
sandwich	3.83784	4.08696	5.75	6.26923	4.72727	2.63636	3.30242	2	11.619	6.38095	4.89706	3.7619	4.61905	4.6087	4	6.88	2.96	3.09524	4.62963	2.27273	6.2973	3.71429	4.52381	3.25	3.19444	4.15152	4.81818	3.30952	5.81818	2.52174	5.63158	2.66667
saw	4.21622	4.26087	4.8	4.26923	3.13043	4.18182	4.3871	2.875	4.61905	4	5.29412	4.2381	4.47619	4.34783	4.05263	6.2381	4.88	6.14286	4.57143	3.85714	6.40541	5.90909	5.04762	5.0625	4.05556	5.15152	5.09091	4.85366	6.71429	3.86957	5.58974	5.66667
scale	5.05405	5.65217	5.1	4.65385	4.26087	4.40909	5.29032	4.33333	12.2381	4.19048	4.59091	4.57895	4.61905	5.17391	5.8	6.84	4.6	6.04762	5.25	4	7.13514	5.38462	4.80952	4.34375	4.13889	5.93939	4.63636	4.78049	6.59091	4.3913	4.5641	5.58333
scarf		4.78261	3.3	3.38462	3.5	3.72727	3.68952	2.33333	8.80952	3		3.80952	2.90476	3.21739	3.55	5.84	3.6		3.46429	2.95455	8.35135	5.07692	4.14286		2.66667	4.18182	2.66667	4.19512	4.05882	3.26087	3.7619	4.91667
scissors	3.62162	4.43478	3.9	3.5	2.82609	3.36364	3.88306	2.375	4.57143	2.52381	3.94118	3.09524	3.61905	3.47826	3.9	5.33333	3.48	3.61905	3.64286	3.22727	6.89189	4.66667	3.52381	3.65625	3.27778	4.42424	3.45455	3.54762	3.54545	2.56522	3.25641	3.08333
sewing machine	5.52778	5.86957	4.5	5.07692	4.08696	5.40909	6.06452	3.29167	12.8095	4.52381	5.29412	4.625	4.95238	3.78261	7.21053	6.95833	5.2	5.85714	4.5	4.31818		5.0625	4.85714	4.625	4.30556	6.15152	4.39394	4.60976	5.45455	3.95652	4.71795	5.83333
shirt	2.94595	3.04348	3.4	4.46154	3.56522	5.40909	3.6371	1.375	3.85714	3.57143	4.07353	2.38095	4.14286	4.17391	2.95	5.18519	3.76	3.52381	4.14286	3.68182	6.94595	4.5	3.7619	3.96875	2.91667	4.75758	3.75758	3.11905	3.63636	3.86957	3.5641	3.70833
shoe	2.72973	3	2.45	2.38462	2.04348	2.31818	2.39113	1.33333	3.57143	2	2.47059	2.19048	2.7619	2.08696	1.95	4.22727	2.4	2.95238	2.46429	2.40909	4.31081	3.57143	2.80952	2.32258	2.95833	3.57576	2.06061	2.30952	2.59091	2.3913	2.02564	2
slide	4.08333	3.47826	3.55	3.5	3.26087	3.04545	2.77419	2.45833	10.3333	2.28571	3.34375	2.30952	3.95238	3.21739	4.73684	8.7	2.76	3.45238	4.75	2.84091	6.31081	3.91667	2.71429	3.4375	2.65714	4.09091	2.78788	3.07143	3.23529	3.47826	3.30769	2.45833
snail	3.40541	4.08696	2.9	2.92308	2.65217	3.40909	3.21545	2.33333	5.19048	2.38095	3.77941	3.09524	3.2381	4.30435	3.25	8.05263	4.68	4.95238	4.28571	2.72727	4.33784	3	4.75	3.15625	3.36111	4.27273	2.60606	3	3.27273	2.78261	5	4.45833
snake		3.86957	3.95	2.88462	3	3.36364	3.5	2.16667	5.47619	3		2.80952	3.8	4.30435	4.66667	5.24	3.48		3.78571	3.59091	4.48649	4	3.71429		3.52778	4.24242	2.44444	3.19048	5.94118	3.04348	3.71429	3.58333
snowman	4.69444	3.95652	4.8	3.03846	2.95652	3.86364	3.14113	2.125	4.33333	2.7619	4.44118	4.95238	3.19048	3.04348	3.1	7.94737	3.44	4.33333	3.5	2.72727	7	4.16667	3.7619	2.9375	2.72222	3.45455	2.63636	4.35714	4.90909	2.95652	3.44737	3.375
sock	2.81081	3.13043	2.7	2.76923	2.04348	2.09091	2.43548	1.5	3.47619	2.2381	3.23529	2.33333	2.52381	2.13043	2.2	4.77778	3.2	3.21429	3.25	2.77273	5.14865	3.38462	2.80952	2.83871	2.31944	3.42424	2.54545	2.54762	3.04545	2.65217	2.30769	2.375
sofa	3.5	3.65217	3.7	3.69231	2.52174	2.86364	3.38211	2.125	3.38095	2.57143	3.25758	2.65	6.90476	2.95652	5.21053	4.68	3.12	3.33333	3.53571	3.22727	5.62162	4	4.09524	3.625	2.37143	4.93939	3.57576	4.80952	3.72727	2.6087	4.41026
spoon	2.81081	3.30435	2.35	2.30769	1.86957	2.09091	2.3629	1.29167	3.33333	1.90476	2.69118	2.09524	2.61905	2.26087	2.10526	3.41667	2.52	2.5	2.5	2.31818	4.14865	4	2.38095	2.46875	1.8	3.39394	2.21212	2.30952	2.59091	2.26087	2.20513	2.04167
squirrel	4.62162	4.04348	4.7	3.26923	3.21739	4.36364	3.82258	2.04167	7.14286	3.42857	4.14706	4.38095	3.38095	4.69565	5.45	10.2609	3.92	5.85714	4.07143	3.13636	4.82432	5.27273	5.04762	3.65625	2.80556	4.36364	3.63636	3.85714	4.13636	2.82609	4.53846	4.95833
stairs		3.56522	3.15	2.88462	2.3913	2.72727	2.90323	2.22222	3.85714	2.28571		3.21429	3.33333	3	3.1	6.16	3.04		3.39286	2.45455	4.54054	3.28571	3.57143		2.80556	4	2.55556	3.35714	3.70588	2.86957	3	3
star	3.02703	3.26087	3	3.07692	3.17391	3.04545	2.83871	1.95833	3.90476	2.66667	2.9697	2.90476	3.65	3.26087	3	5.58333	2.88	3.71429	3.78571	2.95455	4.62162	3.3	3.61905	3.4375	3.02778	4.12121	3	2.88095	4.13636	3.13043	3.20513	3.08333
stool	2.91892	4.21739	4.05	3.53846	4.21739	4.31818	4.19355	3.04167	6.52381	3.2381	4.70588	3.71429	2.85714	4.30435	3.05	3.95238	4.72	6.42857	2.64286	4.65909	4.47297	5.125	4.52381	3.74194	3.22857	3.30303	2.39394	3.95	4.5	3.43478	4.69231
strawberry	4.11111	3.91304	3.35	2.73077	2.6087	3.27273	3.67742	1.83333	10.0952	2.52381	3.63636	2.33333	3.33333	5	4.2	5.76	2.8	3.64286	3.14286	2.68182	5.63514	4	4.2381	3.125	2.63889	3.81818	3	3.47619	3.09091	2.73913	2.92308	4.16667
sun	2.7027	2.95652	2.45	2.30769	2.21739	2.36364	2.37903	1.33333	3.38095	1.90476	2.55882	1.95238	2.61905	2.13043	2.3	4	2.24	2.80952	2.5	2.34091	4.2027	2.81818	3.38095	2.65625	1.97222	3.12121	1.90909	2.2619	2.36364	2.17391	2.4359	2.20833
sunglasses	4.91892	4.73913	5.85	4.73077	3.6087	4.63636	4.66129	3.58333	8.90476	4.42857	4.57812	4.1	3.90476	4.54545	5.55	6	4.36	4.88095	4.25	4.09091	7.35135	5.41667	5.57143	5.125	4.5	5.0303	4.69697	4.2381	5.45455	4.3913	5.46154	4.125
sweater		4.69565	3.15	3.15385	2.47826	2.77273	4.93145	2.05556	5.14286	2.80952		2.80952	3.61905	2.78261	3	3.83333	3.84		3.78571	2.54545	6.64865	3.92308	6.42857		3.80556	4.12121	3.77778	4.56098	3.55556	2.43478	3.14286
swing	3.37838	3.82609	4.5	2.96154	2.30435	3.13636	2.95161	2.04167	9.28571	2.04762	2.83824	2.2381	2.90476	2.43478	5.10526	4.45833	2.96	3.11905	3.57143	2.45455	5.25676	3.63636	2.47619	3.09375	2.27778	3.63636	2.51515	2.71429	2.90909	2.82609	2.79487	2.41667
tail	3.21622	3.56522	3.05	2.92308	2.73913	2.81818	3.10484	2.20833	3.80952	2.90476	3.66667	2.7619	4.04762	3.86957	2.85	4.6087	3.12	3.66667	3.39286	2.86364	4.32432	4.71429	3.80952	3.0625	2.72222	3.75758	3.06061	2.80952	4.27273	2.43478	3.58974	3.91667
tank	4.78378	4.95652	6.15	5	4.86957	6.04545	4.6371	5.25	6.19048	5.04762	5.85938	4.5	6.14286	6.21739	5.4	5.70833	5.76	5.19048	4.53571	4.81818	6.2973	6.5	5.47619	4.6875	4.30556	5.46875	5.3125	5.40476	6.40909	5.86957	6.12821	7.54167
telephone	3.43243	3.65217	4.9	3.69231	3	3.40909	3.55645	1.95833	5.19048	2.90476	3.04412	3.2	3.61905	2.91304	4.85	5.36	2.96	2.7381	4.17857	2.70455	5.56757	3.85714	3.90476	3.5625	3	4.36364	3.24242	3.45238	3.68182	3	3.48718	3.16667
television		4.08696	5.55	3.15385	2.86957	3.27273	3.36694	1.88889	5.66667	3.47619		2.525	3.52381	4.86957	3.75	5.52381	3.12		3.78571	3.43182	5.02703	3.72222			2.77143	3.78788	2.77778	4.92857	3.11765	3.17391	3.09524	3.91667
tennis ball	4.24324	4.82609	6	2.46154	4.52174	5.13636	4.81452	4.33333	6.57143	4.5	5.54545	4.6	5.61905	5.65217	4.85	6.51852	5.08	5	6.39286	4.77273	7.27027	5.07143	2.30952	5.25	5.14286	2.75758	6.09091	4.2381	5.36364	4.3913	6.25641	6.66667
thermometer	6.16216	5.6087	4.85	4.5	4.3913	5.54545	6.34146	3.91667	12.4286	4.90476	4.5	4.28571	4.09524	4.43478	5.63158	7.90909	4.32	4.19048	4.78571	4.18182	9.16216	5.75	5.85	4.21875	4.44444	6.12121	4	5.46341	5	4.21739	6.05128	5.54167
tie	4.2973	3.86957	4.8	5.23077	4.30435	5.36364	4.22177	4.625	4.33333	5.09524	4.97059	4.26316	5.09524	4.21739	4.68421	6.30769	5	5	5.92593	4.36364	7.08108	5.45455	6.42857	4.84375	4.55556	6.15152	5.48485	4.41463	5.68182	4.40909	5.48718
tiger	4.18919	3.69565	4	3.23077	3.04348	4.09091	3.30242	2.91667	5	3.2381	3.54412	2.66667	3.90476	4.56522	4.35	6.33333	3.48	4.71429	4.28571	3.59091	5.37838	4	4.2381	3.625	3.16667	4.30303	4	3.61905	3.59091	3.30435	4.53846	3.625
tomato	3.59459	3.82609	2.95	3.03846	2.82609	3.40909	3.70968	2.04167	4.04762	2.47619	3	2.09524	3.33333	4.3913	5.25	4.43478	2.76	3	3.75	3.31818	4.95946	3.81818	3.66667	3.09375	2.55556	3.93939	3.27273	3.02381	3.13636	2.95652	2.69231	2.20833
toothbrush	3.05405	3.69565	4.25		2.65217	2.95455	2.90323	1.75	4.57143	2.42857	3.9375	2.7619	3.38095	3.04348	3.2	4.33333	3.76	3	3.85714	2.77273	4.43243	3.69231	3.57143	3.375	2.76389	4.18182	2.93939	2.54762	4	2.78261	3.15385	3.20833
tractor	4.21622	4.30435	5.45	3.65385	2.56522	3.81818	3.39516	2.20833	3.61905	3.14286	4.26471	2.66667	3.71429	3.86957	4.35	5.95652	3.84	4.71429	4.21429	2.54545	6.83784	5.09091	5.7619	3.6875	3.55556	5.21212	3.57576	3.57143	4.68182	3.08696	4.46154	5.79167
tree		3.3913	2.3	2.15385	2.17391	2	2.46774	1.22222	3.80952	2		2.28571	2.66667	2.95652	2.15	4	2.36		2.71429	2.47619	3.78378	3.06667	3.14286		1.91667	3.24242	1.66667	2.42857	2.88235	2.54545	2.42857	2.375
trousers	2.86486	3.21739	2.8	2.76923	2.21739	2.27273	3.17339	1.33333	3.28571	2.04762	3.11765	2.38095	2.80952	2.26087	3.89474	4.46154	2.8	2.71429	2.89286	2.27273	4.05405	3.08333	2.80952	2.71875	3.25	3.72727	2.39394	4.09524	2.81818	2.52174	2.87179	2.125
truck	4.45946	3.47826	3.75	4.53846	3	3.90909	3.32258	2.5	3.66667	3.95238	3.91176	2.61905	7.14286	5.08696	3.9	5.38462	3.68	3.59524	4.64286	2.90909	4.63514	4.38462	4.09524	3.9375	3.72222	4.48485	4.90909	3.33333	3.59091	3.26087	3.41026
turtle	3.94595	3.52174	3.65	3.23077	3.65217	4.42857	4.22764	3	11.9524	3.71429	3.42188	2.47619	4.42857	4.26087	5.88235	4.7619	3.48	3.71429	4.67857	3.80952	4.94595	4.46667	3.7619	3.40625	3.38889	4.21212	4.25	3.80952	3.81818	4.21739	3.61538	2.625
umbrella	4.16216	4.69565	3.7	3.73077	3.52174	3.95455	4.125	2.91667	9.2381	3.2381	3.59091	2.7619	4	4.56522	5.55	5.91667	3.28	3.78571	3.78571	3.06818	4.81081	3.7	3.95238	3.59375	3.22222	4.54545	3.51515	4	3.86364	3.69565	3.79487	2.95833
vest		4.95652	7.15	4.11538	3.78261	10.3333	3.29032	3.83333	9.52381	5.3		4.47619	4.61905	4.30435	3.57895	7.15789	3.56		4.85714	5.13636	4.62162	6.38462	5.38095		5.28571	4.60606	4	5.14634	5.1875	4.6087	3.95238
wardrobe		4.91304	3.25	3.19231	4.3913	3.18182	4.37097	2.83333	6.7619	2.7619		2.61905	3.57143	3.08696	6.26316	6.16			3.35714	2.81818	5.35135	5.72727	3.47619		2.69444	4.39394	2.88889	4.61905	3.72222	3.21739	3.2381	3.125
watch	4.02703	4.3913	4.05	3.80769	4.52174	4.81818	3.89516	3.625	5.33333	3.33333	3.39706	4	3.55	3.95652	3.65	5.3913	3.72	3.80952	3.64286	3.18182	5.35135	3.88889	5.28571	3.625	2.77778	3.87879	3.42424	3.45238	3.63636	3.04545	4.15385
watermelon		4.34783	3.85	3.5	4.3913	5.95455	5.15447	4	13.7619	3.90476		2.52381	4.19048	6.86957	10.1667	5.48	3.84		5.14286	5.7619	4.7027	5.07692	3.33333		2.83333	4.18182	3.66667	3.85714	3.82353	4.36364	3.04762	3
wave	4.24324	3.52174	4.45	4.23077	3.52174	4.42857	3.46341	3.66667	5.85714	3.71429	3.92647	3.55	4.66667	4.45455	4.2	6.17391	3.4	4.80952	4.42857	4.33333	6.02703	5.15385	5.38095	4	3.77778	4.33333	4.66667	3.02381	4.04545	4.04545	4.51282	4.41667
whistle	4.62162	4.86957	4.3	3.92308	3.86957	4.04545	4.52419	2.70833	5.2381	3.90476	4.60294	3.80952	3.71429	3.69565	3.6	5.38462	4.44	4.38095	4.67857	3.56818	6.37838	4.42857	4.19048	4.40625	3.80556	5.51515	3.75758	4.2619	4.63636	4.47826	3.30769	3.83333
zebra	4.43243	4.17391	5.25	3.38462	3.43478	4.04545	4.03226	3.79167	9.14286	3.42857	4.625	3	4	4.3913	6.68421	6.2	3.8	6.42857	4.75	3.86364	6.13514	5.08333		3.75	3.58333	4.81818	4.27273	3.45238	4.04545	3.91304	5.42105
bark	3.05405	3.65217	4.85	2.57692	2.86957	3	3.47154	2.125	4.14286	2.61905	3.23529	3.04762	2.90476	3.17391	3.42105	5.80952	3.375	3.21429	3	2.68182	6.83784	4.14286	5.38095	3.09375	2.33333	3.87879	2.75758	2.85714	3.63636	3.26087	2.66667	3.08333
bath	2.64865	3.78261	3.15	2.46154	2.43478	4.33333	3.02479	2.04167	11.9524	2.2381	3.20588	2.38095	2.7619	2.6087	4.89474	4.24	2.79167	2.2619	3.25	3	3.63514	3.80952	3.52381	2.83871	2.30556	3.09091	2.24242	2.14286	2.90909	2.08696	2.73684	2.20833
beg	6.08108	4.17391	6.17647	5.84615	5.65217	5.66667	5.37398	5.375	9.2381	5.04762	5.80303	6.65	6.42857	6.65217	6.55556	4.14815	6.16667	6.2381	5.53571	4.31818	7.51351	6.2	6.19048	6.93548	2.47222	6	6	4.80488	7.18182	5.21739	5.39474	7.375
bite	2.83784	3.26087	2.85	2.84615	2.56522	2.90909	2.91935	2.125	4.38095	2.42857	3.37879	2.80952	3.2	2.52174	4.63158	3.92	3.16667	3.28571	3.39286	2.45455	4	4.28571	3.71429	3.1875	2.38889	3.57576	2.87879	2.42857	3.18182	2.56522	2.71795	2.66667
blow	3.27027	3.91304	2.85	3	2.6087	2.90909	3.47581	2.04167	4.71429	2.90476	3.39062	4.80952	3.33333	2.95652	3.47368	4.25	3.25	3	3.57143	2.59091	4.7027	4.38095	4.2381	3.0625	2.44444	4.36364	2.75758	2.7381	3.18182	2.95652	3.05128	3.625
boil	3.72222	5.26087	4.35	4.11538	3.73913	3.04545	5.18952	3.45833	4.90476	2.61905	4.63235	4.7	4.57143	3.65217	4.58824	5.76	5.29167	5.47619	3.39286	3.54545	7.24324	6.19048	5.61905	4.28125	3.72222	5.12121	4.87879	4.70732	5.72727	3.30435	4.44737	6.16667
box	4.64865	4.13043	6.15	5.73077	4.82609	5.18182	5.04065	4.875	5.66667	4.95238	6.67647	6.45	3.61905	5	6.58824	7.17391	3.91667	2.66667	3.46429	4.40909	8.13514	6.28571	7.15	3.75	2.63889	5.51515	5.69697	3.52381	6.45455	4.86957	5.68421
brush [teeth]	2.97297	3.78261	4.65	3.73077	3.17391	2.81818	3.43089	2	4.38095	2.38095	3.89062	2.90476	3.38095	2.73913	3.73684	4.3913	3.08333	3.11905	3.67857	2.54545	4.18919	3.71429	3.7619	3.25	3.11111	3.51515	2.81818	2.92857	3.59091	2.78261	3.82051	3.29167
build		3.86957	4.6	2.88462	2.86957	5.68182	3.47154	4.5	3.66667	5.80952		2.85714	3.66667	5.34783	4.88235	4.95833	3.625		3.25	2.86364	5.43243	4.85714	6.28571		2.97222	5	2.77778	3.40476	4.29412	3.17391	5.1	3.625
burn	3.62162	4.21739	3.45	4.03846	3.52174	5	4.42742	2.83333	4.66667	3.85714	4.5303	5.09524	3.42857	3.78261	3.72222	5.57143	4.29167	4.02381	3.67857	3.45455	5.21622	4.57143	3.4	3.96875	3	4.57576	3.75758	3.38095	3.86364	3.65217	3.46154	3.875
burst	4.22222	3.52174	5.26316	4.03846	5.34783	5.2381	4.95935	3.16667	6.19048	3.61905	4.69697	3.7619	4.90476	3.95652	4.21053	5.88	4.41667	4.78571	4.89286	3.45455	6.21622	5.71429	4.47619	4.25806	3.19444	4.84848	4.09091	4.04878	4.95455	5.78261	3.97368	3.95833
carry	3.05405	3.86957	2.8	3.34615	3.34783	3.31818	3.66667	2.5	5.61905	2.52381	4.61765	4.28571	3.61905	4.04348	3.52632	5.07407	5.45833	3	2.96429	2.81818	4.45946	3.95238	6.85714	3.59375	2.55556	3.72727	3.09091	2.85714	3.11111	2.69565	3.35897	3.125
carve	6.02703	5.47826	7.5	5.23077	4.21739	5.5	6.02419	4.875	7.90476	4.33333	9.74194	5.73333	5.09524	5.30435	7.4375	5.32	6.79167	6.7619	5.67857	5	7.37838	8.71429	7.61905	4.78125	5.69444	3.90909	5.66667	6.07317	8	6.21739	7.4359
clap	2.97297	3.26087	4	2.80769	2.17391	2.86364	2.76613	1.875	6.80952	2.47619	4.08824	2.14286	2.95238	2.34783	3.10526	4.44	4.29167	2.11905	2.85714	3.27273	3.97297	3.80952	2.95	3.09375	2.5	3.39394	2.24242	2.16667	3.27273	2.30435	3.10256	3
clean		3.78261	3.2	5.46154	3.65217	6.72727	3.5935	1.61111	4.19048	2.95238		2.85714	4.57143	4.30435	3.26316	6	3.33333		3.35714	3.13636	4.43243	4.42857	4.09524		2.5	4.48485	2.66667	2.95238	3.88235	3.22727	3.2381	3.16667
climb	3.05405	3.78261	2.85	2.92308	2.95652	3.18182	3.60976	2.20833	4.90476	3.28571	3.5	2.57143	3.33333	3.13043	4.31579	4.53846	4	3.47619	2.96429	2.95455	4.81081	3.71429	3.80952	4.4375	2.69444	3.87879	2.84848	3.02381	2.90909	3.13043	3.73684	4.375
comb	3.08108	4.26087	3.3	3.23077	4.65217	3.5	3.84677	2.20833	4.38095	2.71429	3.51471	2.71429	3.42857	2.91304	3.55556	4.22222	3.66667	3.38095	3.42857	2.68182	4.45946	4.90476	3.6	3.21875	2.58333	3.72727	2.72727	3.83333	2.95455	3.30435	3.23077	2.875
conduct		6.91304	5.95	6.96154	6.47826	5.63636	7.26613	4.66667	6.52381	6.04762		3.90476	5.47619	4.21739	6.10526	5.73913	6.125		6.35714	5.57143	8.78378	5.38095	11.1905		5.77778	5.90909	5.22222	7.14634	5.76471	6.47826	6.19048
cook	3.66667	3.95652	3.4	2.96154	2.82609	3.31818	3.72581	2.625	4.04762	2.66667	3.52941	3.33333	3.28571	3.43478	3.63158	6	3.29167	3.85714	3.46429	2.77273	5.89189	4.71429	4.61905	3.46875	2.91667	4.33333	2.75758	3.38095	4.04545	2.86957	3.38462	4.375
crawl	3	3.21739	5.2	2.92308	2.73913	3.13636	3.03252	2.16667		2.57143	3.95455	2.66667	3.14286	2.69565	6.94118	5.11538	4.41667	4.52381	4.21429	3	5.59459	6.21053	4.38095	4.5	2.33333	3.45455	2.66667	2.4878	4	2.65217	3.17949	4.08333
cry	2.7027	3.13043	2.4	2.5	2.21739	2.27273	2.48387	1.45833	5.14286	2.14286	2.70588	1.83333	2.57143	2.17391	2.63158	3.66667	2.54167	2.16667	2.96429	2.27273	4.82432	3.38095	3	2.59375	1.91667	3.12121	2.0303	2.09524	2.63636	2.52174	2.24324	1.75
cut	3.78378	3.65217	4	3.73077	3.21739	3.27273	3.35484	2.45833	4	2.90476	3.48529	3.42857	3.80952	3.04348	3.42105	4.79167	3.33333	3.42857	3.82143	3	6.47297	4.7619	4.33333	3.75	3.08333	4.57576	3.33333	3.07143	3.31818	2.95652	3.38462	2.45833
dance	3.59459	3.65217	2.85	3.15385	2.65217	2.95455	3.14634	2.25	4.04762	3.42857	3.60294	2.52381	3.85714	2.91304	3.42105	6.16	3.08333	3.02381	3.28571	2.77273	5.83784	4.28571	4	2.9375	2.33333	4.15152	2.54545	2.92857	3.27273	2.73913	3.69231	2.29167
dig	5.37838	3.6087	5.1	2.92308	2.91304	3.63636	3.57258	2.70833	4.57143	3.61905	4.07576	3.42857	4.04762	2.82609	4.61111	6.28	4	5	3.71429	4.04545	5.86486	5.38095	5.47619	3.3125	2.83333	4.66667	4.39394	2.92857	5.57143	3.43478	4.23684	4.45833
dive	4.43243	4.6087	5.65	2.53846	4.52174	4.68182	5.09756	3.875	5.52381	2.66667	4	5.68421	3.47619	5.34783	4.72222	5.26087	4.16667	5.95238	5.5	4.63636	5.7027	6.38095	6.4	4.59375	4.27778	3.51515	3.93939	4.90244	3.90476	4.47826	5.10256
drag		4.47826	3.9	3.92308	3.69565	5.18182	4.91129	2.54167		5.14286		4.36842	3.66667	3.52174	7.4375	5.91304	4.70833		4.28571	4.45455	4.51351	5.38095	4.11905		3.52778	4.66667	2.55556	4.07317	4.75	4.26087	5.8
draw	3.21622	3.95652	2.85	2.84615	2.56522	2.86364	2.85887	1.95833	3.95238	2.28571	3.11765	2.47619	3.52381	2.78261	2.94737	5.20833	2.70833	3.14286	2.92857	2.27273	4.37838	3.71429	3.2381	2.67742	2.47222	3.36364	2.51515	2.66667	2.95455	2.56522	3.48718	2.54167
drill	4.94595	5.26087	3.7	4.73077	4.34783	4.86364	5.45528	3.66667	4.47619	4.71429	4.43939	5.8	3.38095	4.04348	4.55556	4	6.33333	5.95238	5.21429	4.33333	8.27027	6.4	5.19048	4.09375	4.97143	5.06061	4.84848	4.95	6.5	4.91304	4.66667	4.875
drink	2.72973	3.04348	2.65	2.23077	2.08696	2.04545	2.44355	1.375	3.61905	1.85714	2.80303	2.07143	4.09524	2	2.52632	3.79167	2.25	2.02381	2.60714	2.22727	3.51351	3.04762	5.3	2.25806	1.73611	3.15152	1.72727	2.28571	2.68182	2.17391	2.42105	1.75
drip	3.75	4.26087	5.9	3.96154	3.91304	5	4.43902	2.125	5.38095	3.66667	4.41176	4.5	2.80952	4.21739	4.73684	7.16667	5.83333	4.7619	4.71429	3.72727	7.62162	5.80952	5.47619	3.75	3.16667	5.12121	3.69697	3.97561	5.5	3.91304	4.47368	4.41667
drive	5.27027	4.47826	5.3	4.03846	2.65217	4.09091	3.91532	2	4.28571	3.47619	3.75	4.3	4.28571	3	3.94737	5.42308	4.08333	3.71429	4.14286	2.68182	6.75676	4.7619	5.14286	4.09375	4.38889	4.06061	4.27273	3.46341	4.86364	3.47826	4.5641	3.125
drown	4.69444	5.26087	5.5	4.57692	4.56522	5.5	5.57258	4.04167	5.66667	5.47619	4.66667	5.2	4.52381	5.30435	4.63158	6	4.66667	4.85714	4.71429	4.72727	6.02703	5.90476	5.83333	4.67742	3.97222	5.18182	4.72727	4.66667	5.22727	4.73913	4.84615	5.375
dry	5.32432	3.73913	3.5	5	3.26087	5.36364	3.6748	2.91667	3.95238	3.7619	4.69118	4.33333	5.71429	3.17391	3.89474	6.88889	3.54167	3.35714	4.78571	3.40909	7.21622	6.04762	5.85714	4.0625	3.33333	4.78788	3.90909	4.02381	3.95455	3.6087	4.28205	4.08333
eat	2.54054	3	2.3	2.23077	1.95652	2	2.33871	1.29167	3.85714	1.95238	2.60606	1.83333	4.33333	2	2.42105	4.18182	2.04167	1.95238	2.60714	2.22727	3.2973	3.14286	2.66667	2.13333	1.94444	2.87879	1.75758	1.95238	2.18182	1.91304	2.05128	1.54167
erupt	5.97297	6.65217	5.45	7.84615	5.82609	6	7.20325	4.75	6.19048	5.09524	6.81818	5.65	2.47619	6.04348	7.47059	6.94444	6.58333	5.71429	5.57143	5.47619	8.45946	7.09524	7.57571	4.90625	7.02778	5.30303	5.36364	6.92683	6.61111	6.04348	3.92105
extinguish	6.27027	7.04348	3.3	4.57692	3.21739	5.13636	7.09091	2.79167	5.7619	4.71429	4.14706	3.28571	5.47619	3.17391	4	7.82609	5.70833	4.95238	4.78571	4.71429	4.82432	5	3.7619	4.03125	4.77778	4.60606	4.57576	7.40476	2.95455	3.13043	3.76923	3.25
fall	2.97297	3.26087	2.7	2.84615	2.47826	2.5	2.78226	2.125	4.04762	2.52381	3.05882	2.42857	4.57143	2.04348	2.84211	4.38095	2.58333	2.28571	3	2.81818	4.16216	3.7619	3.04762	3.41935	2.16667	3.15152	2.63636	2.2619	3.22727	2.56522	2.28205	2.16667
feed	3.64865	3.43478	3.15	3.15385	3.30435	3.09091	3.15041	2.45833	5.19048	2.90476	3.25758	3.04762	3.7619	2.6087	5.73684	6.20833	5.16667	3.2381	4	3.22727	5.27027	5.71429	4.19048	2.96875	2.30556	3.24242	2.78788	3.02439	5.19048	2.95652	3.94737	5.375
fight	3.89189	4	3.8	3.73077	3.26087	3.54545	4.03226	2.83333	4.42857	5.2381	4.57353	3.52381	3.33333	4	3.36842	5.45455	3.58333	4.14286	3.78571	2.90909	5.18919	5.04762	4.14286	3.75	3.02778	4.21212	3.54545	3.30952	4.09091	3.69565	3.63158	3.5
file		6.17391	5.85	5.69231	5.5	6	6.06612	5.11111	10.8571	5.38095		7.10526	3.95238	5.43478	9.38462	7.47826	6		6.42857	5.09524	7.27027	5.90476	7.57143		3.97222	6.69697	6.88889	5.4878	10.8333	6	5.57143
fish	4.64865	3.26087	4.4	4.73077	3.34783	3.95455	4.04839	2.95833	4.38095	4.61905	4.26471	4.5	6.14286	3.95652	3.94737	6.95833	4.16667	2.59524	4.10714	3.5	6.81081	5.80952	5.19048	4.65625	3.41667	4.78788	4.06061	3.28571	4.52381	3.86957	5.18421	5
fly	4.18919	3.30435	3.05	3.34615	3.04545	3.45455	3.52419	2.16667	7.19048	3.09524	3.19118	4.05	4.52381	2.95652	3.57895	6.18519	3.04167	3.2381	3.60714	2.72727	4.48649	4.42857	4.2381	3.4375	2.69444	4	3.12121	2.88095	3.36364	3.26087	3.68421	3.83333
fry	3.86486	3.95652	4.95	5	3.82609	3.45455	5.28226	2.58333	5.95238	4.33333	4.38235	4.55	3.57143	4.17391	5.52632	6.89474	5.625	5.52381	3.71429	3.90909	4.59459	6.19048	4.71429	4.3125	3.5	5.51515	5.51515	4.2439	5.18182	3.52174	4.82051	5.375
glue	3.56757	4.08696	3.73684	3.88462	3.30435	3.5	3.84677	2.95833	6.04762	3	4.16176	3.04762	3.57143	3.52174	5.61111	5.57692	3.70833	3.38095	4.17857	3.13636	5.24324	5	4.2381	3.65625	3.47222	4.45455	3.36364	3.85714	3.81818	3.3913	3.87179	3.54167
grate	5.02703	6.3913	4	4.46154	3.47826	5.81818	5.78862	4.41667		5.47619	4.35294	3.42857	3.80952	3.13043	5.35294	7.84615	5.04167	5.80952	4.37037	3	8.02703	4.7619	5.2	4.25	3.52778	5.78788	4.27273	4.80488	5.61905	3.6087	5.02564
grill	4.40541	5.04348	5.7	6.42308	4.14286	6.13636	6	5.21739		4.80952	4.05882	4.94737	5.11111	7.04545	8.6	6.40741	6.45833	5.42857	3.59259	4.04545	7.05405	6.57143	5.07143	8.3125	3.5	4.66667	6.84848	5.2381	6.77273	4.47826	5.76316	6.375
hammer	3.40541	4.65217	4.6	5	3.30435	2.63636	4.80645	3	5.33333	3.7619	4.97059	2.92857	3.45	4	6.94118	6.14815	6.375	4.80952	3.92857	5.19048	7.45946	6	4.95238	4.59375	4.25	4.66667	5.0303	3.33333	5	3.65217	4.21053	4.83333
hatch	5.18919	5.3913	5.9	5.46154	6.04348	5.77273	5.31148	4.20833		4.52381	8.33333	6	4.2381	5	3.36842	6.58333	5.70833	5.42857	5.10714	5.95238	6.7027	6.90476	5.47619	5.1875	4.33333	5.63636	5.21212	4.87805	9.18182	4.82609	4.97368
hitchhike	7.11429	7.30435	6.45	6.61538	6.34783	6.81818	7.55645	6.95833	9.19048	8.09524	7.64706	6.23529	4.85714	7.52174	6.36842	7.84	6.625	8.38095	4.75	6.14286	6.75676	7.57143		7.8125	5.2	6.09091	6.24242	6.65854	8.95455	5.17391	7.97368
hug	3.02703	2.95652	2.75	3.5	3.04348	3.04545	2.50407	1.95833	6.19048	2.90476	3.92424	2.14286	5.15	3.47826	6.55556	7.20833	3.125	4.09524	3.25	4.04545	3.97297	5.19048	3.19048	2.77419	2.36111	3.15152	2.93939	2.33333	3.04545	2.3913	2.84615
hunt	5.08333	5.04348	4.95	4.65385	4.34783	4.54545	5.26613	3.83333	5.61905	4.38095	4.02941	5.2	3.14286	3.81818	5	6	4.79167	5.7619	4.85714	5.14286	6.83784	7.2381	6	5.09375	4.52778	5.09091	5.18182	5	5.63636	4	5.56757	5.625
iron	4.27027	4.86957	4.6	4.34615	4.04348	4.31818	4.97581	2.33333	5.14286	4.28571	4.43939	5.2	5	4.08696	4.15789	6.18519	4.375	4.42857	4.03571	3.54545	4.89189	5.61905	4.38095	4.46875	3.19444	5.0303	3.81818	4.12195	5	4.30435	3.89744	5.25
jump	3.18919	3.17391	2.8	2.53846	2.08696	2.81818	2.83468	1.875	3.61905	2.85714	3.45588	2.35714	4.2381	2.34783	2.7	5.16667	2.875	2.66667	3.10714	2.5	4	3.85714		3.09375	2.41667	3.65625	2.57576	2.52381	5.68182	2.47826	3.15385	2.33333
kick	3	3.56522	4.4	2.92308	2.86364	3.13636	2.95935	2.29167	4.42857	4.71429	3.61765	2.61905	3.09524	3.08696	3.1	4.22222	3.58333	4.33333	3.5	3.63636	4.44595	5.57143	4.7619	3.21875	2.69444	4.21212	3.0303	2.61905	3.77778	2.78261	5.46154	5.125
kiss	2.91892	3.21739	2.4	4.03846	2.52174	4.04545	2.74194	2.5	3.90476	3.14286	2.96875	2.04762	3.47619	2.6087	3	5.78261	3.08333	2.45238	3.39286	3.36364	3.95946	4.14286	2.90476	3.53125	2.16667	3.60606	2.66667	2.2619	3.04545	2.73913	2.33333	4.54167
knit	4.08108	5.73913	5.7	4.57692	3.56522	4.59091	5.36585	3.66667	4.52381	4.09524	4.94118	4.90476	2.61905	3.82609	3.94737	6.92308	5.75	4.7381	4.25	3.63636	7.64865	5.2381	5.33333	5.03125	4.13889	4.96875	4.66667	3.80488	5.95455	3.6087	4.20513	6
knock	3.21622	4.21739	3.55	3.38462	3.13043	3.54545	3.8252	2.29167	4.14286	2.85714	3.23529	2.85714	4.85714	3.13043	3.35	5.07692	3.54167	3.07143	3.92857	3.09091	4.67568	4.71429	3.90476	3.28125	2.52778	4.51515	3.06061	3.33333	4.90909	2.95652	2.94872	2.58333
laugh	2.75676	3.69565	2.65	2.57692	2.43478	2.27273	3.08065	1.79167	4	2.28571	2.66176	2.52381	3.38095	2.34783	2.84211	4.25	2.5	2.64286	3.07143	2.40909	4.91892	3.85714	2.80952	2.75	2.11111	2.81818	2.30303	2.52381	3.22727	2.30435	2.39474	2.33333
lick	3.10811	3.6087	3.1	2.88462	3	3.22727	3.26613	2.33333	4.2381	3.04762	3.95455	2.42857	3.14286	2.95652	3.92857	5.19048	3.125	3.71429	3.82143	2.77273	4.81081	5.71429	3.90476	3.28125	2.69444	4.12121	2.81818	2.85714	3.36364	2.82609	3.13158	3.58333
light	4.27027	3.78261	4	4.61538	3.13043	5.09091	4.3252	3	5.19048	4.52381	3.81818	3	3.7619	3.21739	3.36842	6.19231	3.83333	4.80952	4.21429	3.63636	6.97297	5.2381	3.80952	3.64516	3.83333	4.66667	4.42424	3.2381	3.59091	3.73913	3.5641	3.91667
listen	3.05405	3.43478	2.95	2.88462	3.52174	2.68182	3.15323	2.16667	4	2.09524	2.89394	3.40476	4.09524	2.73913	3	3.92308	2.95833	3.09524	4	2.77273	4.05405	3.71429	3.66667	2.84375	2.38889	3.36364	2.57576	3.07143	3.5	2.91304	3.10526	2.375
marry	5.37838	4.95652	5.35	5.88	4.69565	4.5	4.65323	5.16667	5.09524	4.80952	5.38235	4.71429	4.66667	4.34783	4.10526	7.33333	4.41667	5.28571	5.82143	4.18182	6.72973	6.42857	6.52381	4.75	4.77778	5.48485	5.36364	4.40476	5.59091	4.63636	4.31579	7.41667
massage	6.25	6.3913	7.2	5.80769	6.73913	6.90909	6.58678	4.16667	4.47619	6.19048	5.94118	6.11765	5.61905	4.95652	8.30769	6.55556	5.54167	7.7619	6.78571	4.95238	6	6.33333	6.33333	4.84375	5.14286	5.63636	6.0303	6.4	7.95455	6.17391	6.30769	10.4167
measure	4.59459	5.34783	5.55	4.73077	4.13043	5.81818	5.56098	3.75	4.95238	5.2381	3.66176	4.3	5.8	4.47826	4.89474	5.29167	4.875	5.90476	4.89286	4.59091	5.83784	6.09524	6.2381	4.8125	4.86111	5.51515	4.57576	5.36585	5.40909	4.13043	5.58974	5.29167
melt	4.2973	4.3913	6.05	5.07692	3.6087	4.31818	4.74797	3.20833	4.47619	4.38095	4.54688	6.73684	4.42857	4.34783	4.22222	5.41667	4.58333	5.14286	3.89286	3.72727	5.48649	6.85714	4.42857	4.65625	3.41667	5.15152	4.66667	4.34146	5.63636	4.43478	4.78947	4.375
milk	3.89189	4.34783	5.45	4.96154	4	4.5	4.17742	3.375	4.57143	4.61905	5.62121	5.15	4	4.56522	5.88235	7.29167	5.125	6.38095	4.5	4.42857	6.35135	7.09524	5.85714	4.65625	3.80556	5.84848	5.15152	2.80952	5.59091	4.34783	4.73684	6.25
mix	3.97297	4.13043	4.05	5.80769	4.5	4.59091	3.93089	2.91667	5.85714	3.2381	4.29412	5.75	3.80952	3.3913	3.63158	5.91667	4	5.19048	4.53571	4.22727	5.02703	5.2381	4.66667	5.41935	5.08333	4.75758	4.81818	3.69048	6	3.17391	4.58974	3.20833
mop	4.94595	4.21739	4.05	4.53846	6	4.68182	4.86992	3.69565	4.95238	3.42857	4.27941	3.19048	4.42857	3.86957	3	6.08696	4.29167	4.04762	3.53571	3.63636	7.21622	4.2381	6.61905	4	3.19444	4.60606	4.8125	3.92683	4.81818	4.56522	4.30769	3.16667
open	3.27027	3.56522	2.7	3.15385	2.82609	3.81818	3.01613	1.91667	4.04762	2.71429	3.03125	2.45	4.47619	2.26087	2.78947	4.7619	2.625	2.88095	3	2.68182	4.08108	4.09524	3.47619	2.84375	2.27778	3.57576	2.60606	2.71429	2.63636	2.3913	2.4359	2.29167
operate	5.66667	6.73913	6.3	6.15385	5.47826	6.09091	6.66116	2.33333	5.61905	4.95238	6.79412	6.55	3.38095	5.90909	6.68421	6.96	6.625	6.57143	6.25	5.2381	7.45946	7.90476	7.42857	6.09375	6.88889	6.42424	5.90909	6.70732	6.13636	6	5.86842	7.95833
paint	3.78378	3.91304	3.05	2.84615	2.90909	3.45455	3.30645	2.41667	4.14286	4.95238	5.11765	2.66667	5.95238	3.69565	3.10526	8.86364	4.58333	5.95238	2.92857	3.18182	4.37838	5.80952	3.28571	3.03125	3.19444	4.63636	2.90909	3.2381	2.90909	2.78261	3.07692
pee	2.59459	2.86957	2.35	2.19231	2.08696	2.22727	3.35484	1.45833	4.47619	3.2381	3.19118	4.42105	3.90476	2.17391	4.11111	4.33333	2.25	2.42857	5.18519	2.52273		5.09524	2.47619	2.5	3.30556	3.09091	1.90909	3.21429	5	2.21739	2.84211	4.375
peel	4.05405	4.3913	3.9	4.07692	3.82609	4.04545	4.82114	2.79167	5.14286	3.66667	5	3.9	2.33333	4.45455	7	5.09091	4.70833	4.47619	4.17857	3.90909	6.67568	5.71429	4.42857	4.22581	3.19444	5.30303	4.36364	3.87805	4.40909	3.52174	3.94872	4.41667
photograph	5	5.6087	5.05	4.26923	4.43478	5.25	5.3252	3.45833	5.14286	4.52381	4.70588	3.85714	4.71429	4.04348	6.42105	6.8	4.875	4.19048	4.39286	4	5.94595	5.47619	4.90476	4.25	3.97222	4.48485	4.45455	5.04878	5.40909	4.91304	3.92308	3.33333
pick	3.81081	3.6087	3.75	3.42308	3.13043	3.68182	3.52016	3.04167	3.66667	3.57143	3.36765	3.05	3.95238	3.47826	3.35	6.13636	3.58333	4.14286	3.67857	2.90909	5.86486	5.09524	4.71429	3.5625	3.47222	4.09091	3.09091	3.41463	4.44444	3.34783	3.20513	4.54167
pinch	3.45946	4.08696	3.85	3.92308	3.5	3.36364	3.94262	2.70833	4.66667	4.14286	3.95455	3.8	3.57143	3.52174	6.47059	5.28	4.125	4.40476	3.96429	3.27273	4.32432	5.28571	4.95238	3.78125	3.13889	4.33333	3.39394	3.47619	4.45455	3.43478	4.10526	5.625
plant	3.75676	4.13043	4.25	5.07692	3.82609	4.40909	4.20968	3.91667	4.33333	3.7619	4.39394	3.61905	3.42857	4.82609	4.52632	6.48	4	4.47619	3.96429	4.04762	4.86486	6.28571	4.55	4.4375	3.52778	4.90909	4.15152	3.5122	6.04545	4.56522	4.28205	4.20833
play [the piano]	4.81081	3.17391	5.15	2.57692	3	2.5	2.46371	2.54167	3.61905	4.71429	4.56061	2.90476	4.47619	3.08696	4.94737	8.32	3.41667	4.90476	3.71429	3.54545	7.13514	4.52381	7.19048	4.25806	1.97222	4.36364	2.21212	2.35714	5.13636	2.73913	6.05128	3.91667
play golf		4.86957	9.25	7.69231	6.36364	7.2381	5.52846	6.88889	5.71429	7.3		7.0625	5.14286	6.47826	5.44444	8.20833	2.375		9.5	5.42857	7.51351	7.14286	10.7143		8.62857	3.72727	2	6.1	7.94444	6.56522	6.75	9
plow	5	5.52174	5.65	6.26923	4.86364	5.71429	6.19328	5.04167	5.61905	6	5.66176	6.15	9.14286	6.77273	5.35294	6.61538	5.66667	5.52381	4.78571	5.2381	8.16216	5.52381	6.57143	6.25	5.36111	5.60606	4.69697	6.80488	7.27273	6.13043	5.15789	7.08333
post	4.51351	4.13043	5.05	4.38462	5.86364	4.90909	4.22358	3.95833	4.14286	4.52381	5.45455	4.09524	4.66667	5.6087	5.21053	5.4	5.41667	5.38095	5.03571	4.33333	8	5.66667	6.52381	4.4375	4.83333	5.06061	3.78788	4.53659	5.45455	3.82609	5.51282
pour	3.81081	4.04348	5.95	3.53846	3.18182	4.18182	4.08871	1.91667	4.47619	3.80952	3.97059	4.2381	4.80952	3.3913	3.55556	5.04545	3.91667	4.71429	3.42857	3.31818	5.13514	5.66667	3.40476	3.46875	2.80556	4.27273	3.45455	3.5	5.38095	3.26087	3.42105	3.41667
pull	3.44444	3.69565	4.10526	3.38462	3.56522	3.31818	3.1129	2.38889	4.47619	2.95238	3.65517	3.04762	4	3.30435	3.47368	5.2	3.20833	4.85714	3.92857	3.04545	4.51351	5.19048	4.11905	3.53125	2.91667	4.33333	3	3.26829	3.13636	3.21739	3.48718	3.20833
push	3.40541	3.47826	4.5	3.61538	2.82609	3	3.12195	2.33333	4.38095	2.90476	4.07353	2.85714	4	3.08696	3.5	6.19231	3.5	3.80952	3.75	2.95455	4.17568	5.71429	4.38095	3.4375	2.58333	4.15152	3.33333	2.64286	3.54545	3.6087	3.07692	3
rain	3.05405	3.65217	2.85	2.92308	2.73913	2.81818	2.99597	1.75	4.47619	2.42857	3.21212	2.45	3.5	3.08696	2.66667	4.42308	2.83333	3.02381	3.03571	2.72727	3.81081	3.90476	4.14286	3.41935	2.33333	3.54545	2.51515	2.71429	3.13636	2.65217	2.94737	3.08333
rake	4.7027	4.65217	9.11111	3.76923	3.6087	4.68182	5.48387	2.91667	5.90476	7.2381	5.35294	5.05	4.71429	3.91304	6.1875	9.19048	5.33333	3.7619	4.35714	4.27273	5.89189	6.52632	3.98413	4.125	4.25714	4.39394	4	4.7	3.68182	3.73913	5.30769
read	3.48649	3.52174	3.7	3.26923	3	3.18182	3.19355	2.04167	3.80952	3.19048	3.41176	3.52381	3.57143	3	3.05263	5.375	3.5	3.71429	3.60714	3.04545	4.24324	4.28571	4.14286	3.03125	2.80556	4.33333	2.96875	3.35714	3.45455	3.08696	3.61538	3.66667
ride [a horse]	4	3.6087	5.3	3.15385	3.43478	4.36364	3.66667	2.875	6.95238	3.52381	5.88235	3.8	4.47619	5.04545	4	6.92308	4.70833	3.85714	4.25	3.95455	6.89189	5.28571	5.47619	5.375	3.83333	5.06061	4.12121	3.02439	4.45455	3.69565	4.76316	4.875
ring	4.05405	4.13043	3.55	3.30769	4.04348	3.95455	4.12195	3.16667	11.0952	2.90476	8.54545	3.14286	3.33333	3.56522	4.47368	5.51852	3.5	3.16667	3.96429	3.04545	4.62162	4.61905	4.33333	3.5	3.11111	4.30303	3	4.09756	4.57143	3.26087	3.58974	4.91667
roast	4.67568	5.69565	5.05	3.76923	4.71429	5.13636	5.66129	2.625	5.42857	4.38095	3.98438	7.25	3.90476	6.86364	4.55556	6.27273	5.66667	4.38095	3.60714	4.27273	7.05405	6.57143	5.07143	4.1875	3.5	4.84848	4.60606	5.02381	6.04545	4.86364	4.82051
row	5.10811	4.34783	5.45	6.07692	4.56522	5	4.79508	3.125	5.57143	5.09524	6.38235	7.15	4.61905	4.26087	4.66667	5.68182	5	6.85714	5.64286	5.61905	7.56757	6.09524	5.57143	5.25	4.86111	5.42424	6.21212	4.43902	5.85714	3.73913	6.64103
run	3.13514	2.95652	2.95	2.76923	2.34783	4.31818	2.8629	1.79167	3.66667	2.42857	3	2.61905	3.19048	2.47826	2.78947	4.77778	2.79167	3.07143	3.03571	2.45455	3.91892	4	3.1	2.71875	2.25	3.39394	2.54545	2.59524	2.86364	2.73913	2.38462	2.375
sail	5.38889	4.78261	4.95	6.57692	3.3913	5.45455	5.04839	4.79167	4.38095	5.19048	6.39394	4.80952	7.14286	3.86957	4.26316	7.73913	5.04167	5.04762	8.10714	4.90476	7.56757	6.47619	5.66667	6.125	3.05556	5.15152	5.51515	4.95122	6.36364	4.65217	6.81579
saw	4.78378	4.26087	5.35	4.07692	3.59091	4.36364	4.33871	3.25	4.85714	4.38095	3.45588	5.7	4.90476	4.04348	6.47059	6.23077	5.83333	6.14286	3.78571	4.36364	8.05405	6.57143	5.6	4.875	4	4.60606	4.54545	4.09756	10.9444	3.95652	3.15385	6.25
search		5.13043	3.15	3.07692	4.78261	3	5.02439	2.27778	5.04762	2.47619		3.14286	3.85714	3.26087	4.26316	5.70833	3		3.53571	2.72727	4.24324	5.14286	4.19048		2.47222	4.06061	2	3.69048	3.41176	2.47826	3.80952
sew	4.83784	4.95652	4	4.26923	3.6087	4.63636	5.26016	2.875	5.19048	4.33333	4.75	4.66667	4	3.56522	4.05263	7.6087	4.54167	4.7619	3.89286	3.54545	5.83784	5.61905	5.33333	3.90625	3.52778	5.15152	3.84848	3.95122	4.77273	3.17391	4.86842	4.95833
sharpen	6.16667	5.43478	6.26316	5.61538	4.65217	5.72727	5.14634	4.125	6.52381	5.85714	6.13235	5.5	5.19048	5.26087	5.05556	5.53846	6.08333	7.14286	5.57143	5.42857	6.89189	5.95	5.80952	5.125	4.19444	5.42424	5.63636	4.95238	6.19048	5.30435	7.81579	6.66667
shave	4.89189	5.95652	4.45	4.80769	4.13043	4.45455	5.53659	3.45833	9.90476	4.61905	4.69697	4.5	4.57143	4.30435	4.68421	6	6.83333	5.14286	5.39286	4.04762	6.59459	5.85714	7.61905	4.9375	4.38889	5.60606	5.0303	5.07317	6.09091	4.34783	4.47368	6.375
shear	5.37838	5.95652	6.1	3.73077	3.17391	4.54545	6.5	5.375	5.14286	4.95	4.10294	7.35	4.80952	6.27273	7.25	8.66667	6.70833	6.95238	3.75	4.78947	6.59459	5.90476	8.09524	4.74194	3.52778	4.57576	3.24242	7.34146	9.31818	3.21739	5.36842
shower	4.81081	4.56522	5.15	4.23077	4	3.22727	4.42742	2.95833	8.57143	3.90476	3.60938	2.95238	5.05	4.86957	5.42105	6.75	4.04167	2.28571	3.42857	3.59091	3.63514	5.19048	5.57143	5	4.25714	4.33333	3.9697	4.07317	3.5	4.17391	4.76923
sing	2.91892	3.3913	2.8	2.61538	2.3913	2.81818	3.06048	1.58333	3.71429	2.28571	3.16667	2.19048	3.04762	2.52174	2.89474	4.30435	2.83333	2.7619	2.96429	2.45455	4.62162	3.85714	4.90476	2.9375	2.47222	3.51515	2.48485	2.7619	3	2.34783	3
sink	4.51351	4.30435	4.85	4.65385	3.86957	4.59091	4.4878	3.66667	5.04762	5.33333	5.51515	4.8	5.47619	4.73913		7.31818	5.5	5.04762	4.60714	4.45455	6.21622	5.2381	5.83333	4.96875	3.80556	5.36364	4.51515	4.58537	5.22727	4.17391	4.02632	2.25
sit	2.56757	2.95652	2.65	2.42308	2.26087	2.18182	2.64516	1.33333	3.52381	1.95238	3	2	2.61905	2.26087	2.68421	4.45833	2.58333	2.38095	2.82143	2.63636	3.48649	3.85714	2.85714	2.59375	1.91667	3.09091	2.09091	2.21429	4.16667	2.52174	2.51282	1.75
skate	6.18919	4.91304	5.35	4.03846	4.78261	4.86364	5.14516	6.95833	12.0476	5.61905	7.08824	3.6	6.47619	4.13043	5.82353	8	5	4.28571	4.07143	4.38095	7.21622	5.80952	8	6.9375	6.91667	3.9697	4.9697	5.55	4.5	5.43478	6.05128
ski	6.05405	4.95652	6.9	4.53846	4.73913	5.68182	5.91057	2.45833	7.42857	2.52381	5.69118	5.4	5.42857	4.73913	7.38889	7.70833	5	5.57143	5.14286	5.28571	7.75676	5.52381	7.66667	4.625	4.55556	6.0303	4.78788	5.5	6.28571	4.34783	6.5641
sleep	2.64865	3	2.4	2.23077	2.17391	1.90909	2.33871	1.33333	3.66667	1.90476	2.69118	2	2.85714	2.17391	2.6	3.16	2.41667	1.90476	2.64286	2.18182	3.25676	3.33333	2.6	2.3871	1.81944	2.93939	1.75758	2.07143	2.5	2.13043	2.10526	2.20833
slide	3.38889	3.47826	3.95	3.11538	3.04348	3.22727	3.37097	2.16667	9.57143	2.38095	3.72727	3.02381	3.66667	3.09091	3.47368	6	3.45833	3.45238	4.14286	2.40909	5.75676	4.25	3.42857	3.46875	3.25	4.30303	2.78788	3.26829	5.5	3.43478	3.53846	2.70833
slip	3.97297	4.08696	4	3.42308	4	4.18182	4.02419	2.875	4.04762	3.66667	4.56061	4.85	4.33333	2.82609	5.82353	6.43478	3.54167	3.80952	3.85714	3.59091	6.67568	4.90476	4	4.1875	3.72222	4.57576	3.48485	3.52381	6.22222	3.04348	3.76923
smell	3.16216	3.3913	3.2	3.53846	3.43478	3.13636	3.20968	2.29167	5.90476	2.47619	3.31667	2.80952	3.52381	4.13043	5.76471	4.86364	4.20833	2.90476	3.39286	2.77273	5.32432	4.52381	3.61905	3.3125	2.52778	3.57576	3.12121	2.61905	3.31818	2.86957	3.15789	2.83333
smoke	4.37838		4.9		3.56522	4.72727	5.5	4.29167	5.38095	4.57143	5.16176	5.75	4.66667	4.17391	5.52632	7.18182	5.08333	4.95238	5.60714	3.86364		5.80952		3.8125	4.47222	5.72727	4.78788	4.68293	4.86364	4.3913	4.34211
snow	4.86486	3.47826	4.05	2.88462	2.69565	3.27273	3.33065	2	4.2381	2.61905	4.22059	4.5	3.2381	3	3.21053	6.68	3.5	4.66667	3.39286	2.81818	7.67568	6.14286	3.95238	5.12903	2.55556	3.21212	2.48485	4.45238	4.59091	2.56522	3.44737	4.04167
spill	2.97297	3.73913	5.4	3.19231	2.95652	3.77273	3.4879	2.08333	4.47619	3.61905	3.6875	2.80952	3.71429	2.65217	3.77778	5	4.20833	4.57143	3.35714	2.93182	4.72973	4.52381	3.40476	3.1875	2.86111	4.36364	2.69697	2.95238	3.36364	2.95652	2.89474	3
spin	4.85714	4.95652	6.65	6.23077	4.54545	5.57143	3.78226	4.375		5.61905	5.39706	7	4.7619	5.6087	6.3125	8.5	3.33333	6.38095	5.21429	5.66667	5.83784	8	8.90476	7.34375	5.2	6.18182	6.24242	5.25	4.22222	5	8.47059
squeeze	3.24324	4.6087	5.85	3.65385	4.86957	5.63636	3.96774	3.375	8.33333	4.85714	4.85294	4.55	5.42105	4.47826	4.94444	5.52	5.70833	4.85714	3.96429	4.61905	6.35135	5.90476	5.90476	4.9375	4.19444	5.39394	4.75758	3.45238	5.27273	4.91304	3.58974	4.5
steal	4.40541	4.34783	6	5.34615	4.52174	4.77273	4.69919	3.95833	5.47619	4.38095	4.79412	4.5	5	4.43478	3.94737	5.73913	4.625	4.57143	4.78571	4.5	5.21622	6.52381	5.35	5.09375	4.4	5.125	4.87879	4.31707	4.95455	4.95652	3.73684	6.33333
sting	4.05405	4.3913	4.1	3.38462	3.69565	4.59091	4.33871	2.79167	13.7143	3.57143	6.75758	3.7619	3.35	4	7.875	8.2381	4.16667	4.38095	4.78571	3.04545	6.37838	6.04762	4.28571	5.06452	3.85714	4.81818	3.54545	4.02381	4.45455	3.31818	4.41026	4.33333
stir	3.45946	3.95652	3.95	3.26923	3.17391	3.40909	4.39516	2.625	5.85714	3.2381	4.22059	5.09524	4	3.40909	5.47368	5.08333	3.66667	4.2381	3.67857	3.13636	5.02703	5.47619	4.66667	3.6875	3.05556	4.78788	3.30303	3.7561	5.52381	4.17391	4.10256
stroke	3.48649	3.13043	3.8	2.96154	2.56522	2.59091	3.6129	2.5	5.28571	2.52381	3.76471	2.57143	3.33333	2.45455	4.42105	5.30435	3.58333	4.04762	3.42857	2.77273		5.66667	4.52381	2.90625	3.13889	3.66667	2.75758	4.08333	3.90909	2.73913	4.28947	4.70833
sunbath	5.77778	5.17391	5.25	4.92308	5.26087	5.18182	5.92562	4.29167	7.19048	4.71429	5.64706	4.95238	4.66667	4.91304	4.68421	6.95833	4.875	5.28571	4.96429	4.85714		6.09524	8.14286	5.125	4.02778	5	4.81818	6.1	7.04762	3.6087	4.76923
surf		5.26087	9.8	8.30769	7.82609	6	6.29268	6.52941	9.04762	7.5		5	8.9	9.3913	8.63158	7.52381	8.75		10.1429	7.04762	7.21622	8.15	9.52381		10.0286	4.29032	7.22222	5.80488	6.5	6.82609	8.1
sweat	4.59459	4.95652	5.25	4.84615	4.17391	5.04545	5.42276	4.79167	6.09524	4.66667	4.98529	4.57143	4.85714	5.82609	4.44444	5.21053	4.66667	5.09524	5.75	3.77273	6.21622	5.66667		5.25	4.44444	5.15152	5.33333	5.2619	5.04545	4.47826	3.89189	4.625
sweep	3.56757	4.65217	4	3.92308	3.08696	3.59091	4.78455	3.08333	4.42857	3.80952	3.80882	3.28571	3.66667	3.30435	3.05263	6.08	4.375	4.38095	3.60714	3.27273	4.72973	4.71429	3.98413	4.03125	3.33333	4.54545	3.33333	3.2439	4.19048	3.73913	3.64103	3.75
swim	3.40541	3.6087	3.95	3.34615	3.13043	3	3.46774	2.25	4.47619	3.52381	3.52941	3.80952	4.28571	3.82609	3.33333	7.04545	3.54167	3.71429	3.82143	3.27273	6.02703	4.2381	4.66667	3.9375	3.22222	3.9697	3.66667	3.09524	3.72727	3.3913	3.71795	3.08333
swing	3.35135	3.82609	3.45	2.80769	2.47826	3.27273	3.49194	2.125		2.19048	3.30882	2.42857	3.14286	2.86957	3.15789	4.91667	4.125	3.11905	3.39286	2.68182	3.71622	4.14286	3.42857	3.09375	2.5	3.54545	2.51515	2.92857	5.57143	2.69565	3.28205	2.58333
talk [on the phone]	3.83784	2.95652	5.1	3.07692	3	3.22727	2.68548	1.95833	3.47619	3.33333	3.69118	2.42857	3.42857	2.56522	4.42105	5.13043	3.54167	3.59524	3.82143	3.22727	4.97297	5.19048	4.33333	4.96875	2	4.66667	3.39394	2.28571	4.09091	2.34783	3.65789	3.54167
tear	4	3.95652	3.85	3.42308	6.26087	3.95455	4.33871	2.54167	4.95238	3.90476	4.19697	3.14286	4.09524	3.36364	4.76471	5.31818	3.95833	3.57143	4.75	3.5	5.10811	4.28571	4	4.3125	3	4.75758	3.21212	3.90244	6.2381	3.3913	3.23077	3
throw	3.67568	4.78261	3.45	3.69231	3.13636	3.95455	3.28226	2	4	2.7619	3.17647	2.71429	3.95238	3.21739	3.31579	4.25926	4.29167	2.95238	3.07143	2.86364	4.51351	4.33333	4.95238	3.4375	2.88889	3.57576	2.75758	3.04762	3.45455	2.43478	2.5641	2.41667
tie	3.75676	3.86957	3.45	3.69231	3.56522	4.04545	4.13821	3.41667	4.47619	3.61905	3.88235	3.57143	4	3.43478	3.73684	5.22727	4.45833	5	3.53571	3.40909	4.83784	5.57143	4.66667	3.78125	3.09722	4.63636	3.71875	3.78571	4.22727	3.04348	3.84615	3.5
type	5.64865	4.91304	5.85	3.42308	8.04545	5.45455	5.83871	4.25	13.619	5.28571	6.65625	6.82353	6.2381	5.91304	5.73684	9.24	6.54167	6.09524	6.35714	5.52381	7.35135	5.7619	9.38095	5.6875	6.30556	4.21212	5.39394	5.58537	6	3.36364	6.71795	7.08333
vacuum	5.05405	4.95652	6.65	4.30769	3.30435	3.86364	5.40323	2.91667		3.90476	3.75	4.2381	6.09524	3.95652	8.47059	6	3.16667	4.52381	3.32143	3.77273	7.38889	4.19048	3.98413	4.15625	4	4.93939	3.46875	4.82927	6.5	3.56522	5.39474
wake up	3.22222	4.30435	3	2.92308	2.65217	2.81818	2.96774	1.79167	3.7619	3	2.97059	3.14286	3.04762	2.86957	2.73684	3.72	2.875	3.2381	3.53571	3.04545	3.77027	3.95238	3.42857	3	2.44444	3.72727	2.48485	2.80952	3.18182	2.78261	2.55263
walk	2.78378	3.08696	2.4	2.42308	2.30435	2.04545	2.55242	1.70833	3.28571	2.09524	2.94118	2.04762	2.80952	2.69565	2.57895	3.86364	2.45833	2.5	2.46429	2.36364	4.97297	3.47619	3	2.48387	1.88889	3.06061	2.57576	2.17073	3.09091	2.13043	2.10256	1.95833
wash [clothes]	2.78378	3.52174	3.2	3.88462	3.04348	3.04545	2.9879	3.83333	3.61905	2.66667	3.40625	3.90476	3.38095	3	3.26316	5.4	3.29167	3.45238	3.75	3.36364	4.59459	4.09524	4.19048	4.03125	3.08333	4.30303	3.60606	2.59524	3.45455	3.13043	3.97436	2.5
watch [TV]	5.35135	4.3913	5.9	2.76923	2.3913	2.81818	3.31452	2.29167	3.38095	3.85714	2.69697	3.8	3.6	2.69565	3.84211	4.58333	2.41667	3.2381	4.10714	3.22727	6.14865	3.85714	4.57143	3.59375	1.94444	3.15152	3.09091	3.35714	3.59091	3.6087	3.52632	2.25
water	3.64865	3.69565	3.5	3.65385	3	5.80952	3.79032	2.54167	8.38095	3.2381	3.82353	4.19048	4.09524	4	3.21053	5.5	4.25	4.42857	3.78571	3.33333	4.7027	5.52381	3.80952	3.75	3.08333	4.48485	3.21212	2.52381	4	2.95652	3.97436	4.66667
wave	2.94595	3.52174	3.15	2.61538	2.21739	2.5	2.93145	1.66667	5.33333	2.2381	3.08824	5.04762	3.2381	3.95652	4.44444	4.65217	2.54167	4.80952	4	2.59091	4.87838	3.71429	4.2381	2.83871	5.02778	3.33333	2.42424	2.61905	3.27273	3.17391	2.48718	3.04167
weigh	5.02703	5.04348	4.7	4.46154	4.43478	4.27273	5.36585	3.66667	4.95238	4	4.5625	5.95	5.09524	4.65217	5.88889	6.14286	4.75	5.42857	4.5	4.18182	6.45946	6	6.19048	4.375	4.19444	5.18182	4.27273	5.14634	4.57143	3.6087	5.30769	5.54167
whisper	4.08108	4.56522	6.35	3.57692	3.26087	3.45455	3.97561	2.875	9.2381	3.52381	4.69118	4	4.2381	3.30435	5.42105	4.95652	5.75	4.14286	6.28571	3.61905	5.62162	7.14286	5.2381	4.4375	3.38889	4.39394	3.36364	3.35714	6.09091	2.6087	4.94872	4.58333
whistle	3.21622	4.86957	3.95	3.65385	3.52174	3.5	4.6129	3.16667	4.71429	3.66667	4.44118	4	3.85714	3.47826	3.63158	6.59091	4.45833	4.38095	4.46429	3.31818	4.7027	5.04762	4.09524	4.28125	3.5	4.87879	3.36364	3.21429	4.57143	3.43478	3.94872	4.41667
wink	4.35135	4.56522	5.75	3.46154	3.43478	4.77273	4.86992	4.41667	6.38095	4.52381	4.04412	4.85714	4.57143	4.43478	5.33333	5.88889	5.25	5	5.42857	4.35	6.40541	6.28571	4.19048	4.09375	4.05556	5.36364	3.45455	4.11905	5.45455	3.04348	3.97368	5.83333
write	3.7027	3.95652	3.75	3.42308	5.47826	3.59091	3.8871	2.79167	4.61905	3.52381	3.29412	3.61905	3.66667	3.3913	3.21053	4.58333	3.45833	3.66667	3.67857	3.5	4.24324	4.14286	4.09524	3.41935	3.41667	4.15152	3.60606	3.53659	3.72727	3.30435	3.71795	3.20833
