# Supplementary material for: Age of acquisition of 299 words in seven languages: American English, Czech, Gaelic, Lebanese Arabic, Malay, Persian and Western Armenian
Source: PLoS One. 2019 Aug 8;14(8):e0220611. doi: 10.1371/journal.pone.0220611 (PMC6687123; doi:10.1371/journal.pone.0220611)
Supplement: S2 Table — (XLSX) [file pone.0220611.s002.xlsx]

## Sheet: Arkusz1
word	Part	AoA	Word	Language	Length in phonemes	Length in letters	Compund word	Frequency
airplane	1	3.78261	plane	American English	4	5	0	4872
ant	1	3.08696	ant	American English	3	3	0	273
apple	1	3.04348	apple	American English	3	5	0	1207
axe	1	5.04348	axe	American English	3	3	0	249
ball	1	2.6087	ball	American English	3	4	0	5353
balloon	1	3.65217	balloon	American English	5	7	0	442
banana	1	3.47826	banana	American English	6	6	0	547
barrel	1	5.3913	barrel	American English	5	6	0	542
basket	1	4.3913	basket	American English	6	6	0	672
battery	1	5	battery	American English	6	7	0	633
bear	1	3.30435	bear	American English	3	4	0	2928
bed	1	2.73913	bed	American English	3	3	0	9543
bell	1	3.47826	bell	American English	3	4	0	2006
belt	1	4.13043	belt	American English	4	4	0	1242
bicycle	1	3.52174	bike	American English	3	4	0	1320
bird	1	3.17391	bird	American English	3	4	0	2318
blackboard	1	5.21739	chalkboard	American English	7	10	1	12
bone	1	4	bone	American English	3	4	0	1329
boot	1	3.91304	boot	American English	3	4	0	568
bottle	1	3.3913	bottle	American English	4	6	0	2588
broom	1	4.43478	broom	American English	4	5	0	243
brush	1	3.78261	brush	American English	4	5	0	722
bus	1	3.65217	bus	American English	3	3	0	3783
butterfly	1	4.08696	butterfly	American English	7	9	1	281
button	1	4.08696	button	American English	4	6	0	1441
candle	1	4.34783	candle	American English	5	6	0	409
car	1	2.95652	car	American English	3	3	0	24636
carrot	1	3.6087	carrot	American English	5	6	0	195
cat	1	2.78261	cat	American English	3	3	0	3383
chain	1	4.78261	chain	American English	3	5	0	1082
chair	1	3.65217	chair	American English	3	5	0	2511
cheese	1	3.73913	cheese	American English	3	6	0	1991
clock	1	3.78261	clock	American English	4	5	0	2990
cloud	1	3.47826	cloud	American English	4	5	0	599
comb	1	4.26087	comb	American English	3	4	0	309
computer	1	4.56522	computer	American English	8	8	0	3011
cow	1	3.04348	cow	American English	2	3	0	1301
crocodile	1	4.43478	alligator	American English	7	9	0	178
cucumber	1	5.21739	cucumber	American English	8	8	0	101
desk	1	4.26087	desk	American English	4	4	0	2239
dog	1	2.78261	dog	American English	3	3	0	9835
doll	1	2.95652	doll	American English	3	4	0	1263
door	1	3.30435	door	American English	3	4	0	14895
dress	1	3.73913	dress	American English	4	5	0	4447
drum	1	3.86957	drum	American English	4	4	0	432
duck	1	3.17391	duck	American English	3	4	0	1263
dummy	1	4.47826	pacifier	American English	7	8	0	20
ear	1	2.86957	ear	American English	2	3	0	1632
elephant	1	4.30435	elephant	American English	7	8	0	580
envelope	1	5.3913	envelope	American English	7	8	0	513
eye	1	2.86957	eye	American English	1	3	0	5701
feather	1	4.08696	feather	American English	4	7	0	338
fish	1	3.26087	fish	American English	3	4	0	4258
flag	1	3.82609	flag	American English	4	4	0	892
flower	1	3.3913	flower	American English	4	6	0	1161
fly	1	3.30435	fly	American English	3	3	0	4335
fork	1	3.13043	fork	American English	4	4	0	450
frog	1	3.52174	frog	American English	4	4	0	603
frying pan	1	3.86957	pan	American English	3	3	0	627
gate	1	4.17391	gate	American English	3	4	0	1634
giraffe	1	4.17391	giraffe	American English	5	7	0	76
glass	1	4.08696	glass	American English	4	5	0	3096
glasses	1	4.34783	glasses	American English	6	7	0	1689
goat	1	4	goat	American English	3	4	0	537
guitar	1	4.82609	guitar	American English	5	6	0	795
gun	1	4.56522	gun	American English	3	3	0	10873
hat	1	3	hat	American English	3	3	0	3273
heart	1	3.73913	heart	American English	4	5	0	12453
helicopter	1	5.30435	helicopter	American English	9	10	0	806
Hen	1	3.82609	chicken	American English	5	7	0	3148
horse	1	3.47826	horse	American English	4	5	0	4737
house	1	3.26087	house	American English	3	5	0	26214
iron	1	4.86957	iron	American English	3	4	0	915
kangaroo	1	4.91304	kangaroo	American English	7	8	0	118
key	1	3.6087	key	American English	2	3	0	4430
knife	1	4.04348	knife	American English	3	5	0	2387
ladder	1	4.3913	ladder	American English	4	6	0	472
lamp	1	4.04348	lamp	American English	4	4	0	657
leaf	1	3.34783	leaf	American English	3	4	0	265
leg	1	3	leg	American English	3	3	0	2882
lemon	1	4.13043	lemon	American English	5	5	0	613
lighter	1	6.13043	lighter	American English	4	7	0	457
lion	1	3.43478	lion	American English	4	4	0	783
lipstick	1	5.21739	lipstick	American English	7	8	1	449
match	1	4.82609	match	American English	3	5	0	2521
monkey	1	3.6087	monkey	American English	5	6	0	1709
moon	1	3.30435	moon	American English	3	4	0	2548
motorbike	1	5.3913	motorcycle	American English	8	10	1	455
mouse	1	3.6087	mouse	American English	3	5	0	975
mushroom	1	5.47826	mushroom	American English	6	8	0	109
needle	1	5.21739	needle	American English	4	6	0	608
nest	1	4.04348	nest	American English	4	4	0	566
newspaper	1	5.04348	newspaper	American English	7	9	1	1208
nose	1	2.86957	nose	American English	3	4	0	3557
onion	1	4.78261	onion	American English	5	5	0	216
orange	1	3.65217	orange	American English	5	6	0	1138
owl	1	3.34783	owl	American English	2	3	0	286
paintbrush	1	4.73913	paintbrush	American English	8	10	1	27
pear	1	4.04348	pear	American English	3	4	0	68
pen	1	3.6087	pen	American English	3	3	0	1261
pencil	1	3.69565	pencil	American English	5	6	0	503
penguin	1	4.56522	penguin	American English	7	7	0	147
pineapple	1	4.82609	pineapple	American English	6	9	1	130
pizza	1	3.65217	pizza	American English	5	5	0	1709
postman	1	4.73913	mailman	American English	6	7	1	147
rabbit	1	3.13043	bunny	American English	4	5	0	946
racket	1	5.86957	racket	American English	5	6	0	379
rainbow	1	4.26087	rainbow	American English	5	7	1	407
roof	1	4.3913	roof	American English	3	4	0	1818
ruler	1	4.95652	ruler	American English	4	5	0	162
sandwich	1	4.08696	sandwich	American English	6	8	0	1118
saw	1	4.26087	saw	American English	2	3	0	20527
scale	1	5.65217	scale	American English	4	5	0	485
scarf	1	4.78261	scarf	American English	5	5	0	239
scissors	1	4.43478	scissors	American English	5	8	0	341
sewing machine	1	5.86957	sewing machine	American English	9	14	1
shirt	1	3.04348	shirt	American English	3	5	0	2365
shoe	1	3	shoe	American English	2	4	0	1550
slide	1	3.47826	slide	American English	4	5	0	909
snail	1	4.08696	snail	American English	4	5	0	90
snake	1	3.86957	snake	American English	4	5	0	1140
snowman	1	3.95652	snowman	American English	6	7	1	97
sock	1	3.13043	sock	American English	3	4	0	458
sofa	1	3.65217	couch	American English	3	5	0	1197
spoon	1	3.30435	spoon	American English	4	5	0	388
squirrel	1	4.04348	squirrel	American English	7	8	0	279
stairs	1	3.56522	stairs	American English	5	6	0	1212
star	1	3.26087	star	American English	4	4	0	4149
stool	1	4.21739	stool	American English	4	5	0	179
strawberry	1	3.91304	strawberry	American English	8	10	1	282
sun	1	2.95652	sun	American English	3	3	0	3553
sunglasses	1	4.73913	sunglasses	American English	9	10	1	201
sweater	1	4.69565	sweater	American English	5	7	0	704
swing	1	3.82609	swing	American English	4	5	0	1325
tail	1	3.56522	tail	American English	3	4	0	1219
tank	1	4.95652	tank	American English	4	4	0	1306
telephone	1	3.65217	phone	American English	3	5	0	13756
television	1	4.08696	television	American English	8	10	0	1729
tennis ball	1	4.82609	tennis ball	American English	8	11	1
thermometer	1	5.6087	thermometer	American English	8	11	0	112
tie	1	3.86957	tie	American English	2	3	0	2266
tiger	1	3.69565	tiger	American English	4	5	0	945
tomato	1	3.82609	tomato	American English	6	6	0	301
toothbrush	1	3.69565	toothbrush	American English	7	10	1	255
tractor	1	4.30435	tractor	American English	6	7	0	190
tree	1	3.3913	tree	American English	3	4	0	3315
trousers	1	3.21739	pants	American English	5	5	0	2996
truck	1	3.47826	truck	American English	4	5	0	3716
turtle	1	3.52174	turtle	American English	4	6	0	869
umbrella	1	4.69565	umbrella	American English	7	8	0	382
vest	1	4.95652	vest	American English	4	4	0	284
wardrobe	1	4.91304	dresser	American English	5	7	0	182
watch	1	4.3913	watch	American English	3	5	0	16831
watermelon	1	4.34783	watermelon	American English	9	10	1	112
wave	1	3.52174	wave	American English	3	4	0	1084
whistle	1	4.86957	whistle	American English	5	7	0	788
zebra	1	4.17391	zebra	American English	5	5	0	128
bark	2	3.65217	bark	American English	5	5	0	280
bath	2	3.78261	bathe	American English	4	6	0	128
beg	2	4.17391	beg	American English	4	4	0	2600
bite	2	3.26087	bite	American English	4	5	0	2080
blow	2	3.91304	blow	American English	4	5	0	4976
boil	2	5.26087	boil	American English	4	5	0	303
box	2	4.13043	box	American English	6	5	0	4577
brush [teeth]	2	3.78261	brush	American English	6	7	0	722
build	2	3.86957	build	American English	5	6	0	2452
burn	2	4.21739	burn	American English	4	5	0	2816
burst	2	3.52174	pop	American English	4	4	0	3441
carry	2	3.86957	carry	American English	5	7	0	3361
carve	2	5.47826	carve	American English	5	6	0	158
clap	2	3.26087	clap	American English	5	5	0	241
clean	2	3.78261	clean	American English	5	6	0	6183
climb	2	3.78261	climb	American English	5	6	0	1007
comb	2	4.26087	comb	American English	4	5	0	309
conduct	2	6.91304	conduct	American English	8	8	0	566
cook	2	3.95652	cook	American English	4	5	0	2324
crawl	2	3.21739	crawl	American English	5	6	0	614
cry	2	3.13043	cry	American English	4	5	0	3348
cut	2	3.65217	cut	American English	4	4	0	11718
dance	2	3.65217	dance	American English	6	6	0	7550
dig	2	3.6087	dig	American English	4	4	0	2357
dive	2	4.6087	dive	American English	4	5	0	654
drag	2	4.47826	drag	American English	5	5	0	1349
draw	2	3.95652	draw	American English	4	5	0	2061
drill	2	5.26087	drill	American English	5	6	0	701
drink	2	3.04348	drink	American English	6	6	0	12617
drip	2	4.26087	drip	American English	5	5	0	261
drive	2	4.47826	drive	American English	5	6	0	7810
drown	2	5.26087	drown	American English	5	6	0	540
dry	2	3.73913	dry	American English	4	5	0	2184
eat	2	3	eat	American English	3	4	0	12846
erupt	2	6.65217	erupt	American English	6	6	0	20
extinguish	2	7.04348	extinguish	American English	12	12	0	43
fall	2	3.26087	fall	American English	4	5	0	6044
feed	2	3.43478	feed	American English	4	5	0	2162
fight	2	4	fight	American English	4	6	0	10255
file	2	6.17391	file	American English	4	5	0	2246
fish	2	3.26087	fish	American English	5	6	0	4258
fly	2	3.30435	fly	American English	4	5	0	4335
fry	2	3.95652	cook	American English	4	5	0	2324
glue	2	4.08696	glue	American English	4	5	0	300
grate	2	6.3913	grate	American English	5	6	0	52
grill	2	5.04348	grill	American English	5	6	0	227
hammer	2	4.65217	hammer	American English	5	7	0	636
hatch	2	5.3913	hatch	American English	5	7	0	654
hitchhike	2	7.30435	hitchhike	American English	7	10	1	48
hug	2	2.95652	hug	American English	4	4	0	986
hunt	2	5.04348	hunt	American English	5	5	0	1319
iron	2	4.86957	iron	American English	4	5	0	915
jump	2	3.17391	jump	American English	5	5	0	3561
kick	2	3.56522	kick	American English	4	5	0	3744
kiss	2	3.21739	kiss	American English	5	6	0	6179
knit	2	5.73913	knit	American English	4	5	0	97
knock	2	4.21739	knock	American English	4	6	0	3299
laugh	2	3.69565	laugh	American English	4	6	0	3206
lick	2	3.6087	lick	American English	4	5	0	559
light	2	3.78261	light	American English	4	6	0	8425
listen	2	3.43478	listen	American English	5	7	0	27784
marry	2	4.95652	marry	American English	5	7	0	5322
massage	2	6.3913	massage	American English	7	8	0	565
measure	2	5.34783	measure	American English	5	8	0	537
melt	2	4.3913	melt	American English	5	5	0	373
milk	2	4.34783	milk	American English	5	5	0	2169
mix	2	4.13043	mix	American English	6	5	0	834
mop	2	4.21739	mop	American English	4	4	0	211
open	2	3.56522	open	American English	5	5	0	16341
operate	2	6.73913	operate	American English	7	8	0	682
paint	2	3.91304	paint	American English	5	6	0	1877
pee	2	2.86957	pee	American English	3	4	0	925
peel	2	4.3913	peel	American English	4	5	0	273
photograph	2	5.6087	photograph	American English	9	11	1	579
pick	2	3.6087	pick	American English	4	5	0	10118
pinch	2	4.08696	pinch	American English	6	7	0	312
plant	2	4.13043	plant	American English	6	6	0	1408
play [the piano]	2	3.17391	play	American English	4	5	0	18081
play golf	2	4.86957	golf	American English	5	5	0	1302
plow	2	5.52174	plow	American English	4	5	0	96
post	2	4.13043	mail	American English	4	5	0	1879
pour	2	4.04348	pour	American English	4	5	0	771
pull	2	3.69565	pull	American English	4	5	0	7469
push	2	3.47826	push	American English	5	6	0	3598
rain	2	3.65217	rain	American English	4	5	0	2494
rake	2	4.65217	rake	American English	4	5	0	152
read	2	3.52174	read	American English	4	5	0	12302
ride [a horse]	2	3.6087	ride	American English	4	5	0	6904
ring	2	4.13043	ring	American English	4	5	0	4730
roast	2	5.69565	roast	American English	5	6	0	499
row	2	4.34783	row	American English	3	4	0	1343
run	2	2.95652	run	American English	4	4	0	17878
sail	2	4.78261	sail	American English	4	5	0	701
saw	2	4.26087	saw	American English	3	4	0	20527
search	2	5.13043	search	American English	5	8	0	2467
sew	2	4.95652	sew	American English	3	4	0	280
sharpen	2	5.43478	sharpen	American English	7	8	0	57
shave	2	5.95652	shave	American English	4	6	0	702
shear	2	5.95652	shave	American English	4	6	0	702
shower	2	4.56522	shower	American English	4	7	0	2097
sing	2	3.3913	sing	American English	4	5	0	4977
sink	2	4.30435	sink	American English	5	5	0	863
sit	2	2.95652	sit	American English	4	4	0	15879
skate	2	4.91304	skate	American English	5	6	0	301
ski	2	4.95652	ski	American English	4	4	0	413
sleep	2	3	sleep	American English	5	6	0	11625
slide	2	3.47826	slide	American English	5	6	0	909
slip	2	4.08696	slip	American English	5	5	0	1320
smell	2	3.3913	smell	American English	5	6	0	4240
snow	2	3.47826	snow	American English	4	5	0	1599
spill	2	3.73913	spill	American English	5	6	0	432
spin	2	4.95652	sew	American English	3	4	0	280
squeeze	2	4.6087	squeeze	American English	7	8	0	769
steal	2	4.34783	steal	American English	5	6	0	2720
sting	2	4.3913	sting	American English	5	6	0	358
stir	2	3.95652	stir	American English	4	5	0	301
stroke	2	3.13043	pet	American English	4	4	0	1029
sunbath	2	5.17391	tan	American English	4	4	0	439
surf	2	5.26087	surf	American English	4	5	0	324
sweat	2	4.95652	sweat	American English	5	6	0	1115
sweep	2	4.65217	sweep	American English	5	6	0	485
swim	2	3.6087	swim	American English	5	5	0	1622
swing	2	3.82609	swing	American English	5	6	0	1325
talk [on the phone]	2	2.95652	talk	American English	4	5	0	43605
tear	2	3.95652	rip	American English	4	4	0	1028
throw	2	4.78261	trash	American English	5	7	0	1146
tie	2	3.86957	tie	American English	3	4	0	2266
type	2	4.91304	type	American English	4	5	0	3093
vacuum	2	4.95652	vacuum	American English	7	7	0	294
wake up	2	4.30435	yawn	American English	4	5	0	51
walk	2	3.08696	walk	American English	4	5	0	11009
wash [clothes]	2	3.52174	wash	American English	5	6	0	2077
watch [TV]	2	4.3913	watch	American English	5	7	0	16831
water	2	3.69565	water	American English	5	6	0	11478
wave	2	3.52174	wave	American English	4	5	0	1084
weigh	2	5.04348	weigh	American English	3	6	0	363
whisper	2	4.56522	whisper	American English	7	8	0	403
whistle	2	4.86957	whistle	American English	6	8	0	788
wink	2	4.56522	wink	American English	5	5	0	180
write	2	3.95652	write	American English	4	6	0	6467
airplane	1	2.88462	letadlo	Czech	7	7	0	374
ant	1	3.34615	mravenec	Czech	8	8	0	52
apple	1	2.19231	jablko	Czech	6	6	0	299
axe	1	4.38462	sekera	Czech	6	6	0	46
ball	1	2.30769	míč	Czech	3	3	0	49
balloon	1	2.57692	balónek	Czech	7	7	0	27
banana	1	2.30769	banán	Czech	5	5	0	46
barrel	1	4.03846	sud	Czech	3	3	0	94
basket	1	3.30769	košík	Czech	5	5	0	100
battery	1	5.46154	baterie	Czech	8	7	0	29
bear	1	2.69231	medvěd	Czech	7	6	0	84
bed	1	2.34615	postel	Czech	6	6	0	582
belt	1	3.88462	pásek	Czech	5	5	0	60
bicycle	1	2.92308	kolo	Czech	4	4	0	1213
bird	1	2.42308	pták	Czech	4	4	0	128
blackboard	1	4.61538	tabule	Czech	6	6	0	63
bone	1	3.80769	kost	Czech	4	4	0	261
boot	1	2.38462	bota	Czech	4	4	0	680
bottle	1	2.76923	láhev	Czech	5	5	0	153
broom	1	3.5	koště	Czech	5	5	0	28
brush	1	4.38462	kartáč	Czech	6	6	0	25
bus	1	3.23077	autobus	Czech	6	7	1	980
butterfly	1	2.92308	motýl	Czech	5	5	0	25
button	1	3.53846	knoflík	Czech	7	7	0	27
candle	1	3.5	svíčka	Czech	6	6	0	145
car	1	2.42308	auto	Czech	3	4	0	2902
carrot	1	2.88462	mrkev	Czech	5	5	0	81
cat	1	2.15385	kočka	Czech	5	5	0	502
chain	1	4.57692	řetěz	Czech	5	5	0	72
chair	1	2.53846	židle	Czech	5	5	0	234
cheese	1	3.11538	sýr	Czech	3	3	0	283
clock	1	3.19231	hodiny	Czech	6	6	0	94
cloud	1	2.73077	mrak	Czech	4	4	0	105
comb	1	3.26923	hřeben	Czech	6	6	0	42
computer	1	5.84615	počítač	Czech	7	7	0	940
cow	1	2.65385	kráva	Czech	5	5	0	402
crocodile	1	3.73077	krokodýl	Czech	8	8	0	13
cucumber	1	3.11538	okurka	Czech	6	6	0	157
desk	1	2.57692	stůl	Czech	4	4	0	692
dog	1	2.07692	pes	Czech	3	3	0	1297
doll	1	2.57692	panenka	Czech	7	7	0	62
door	1	2.61538	dveře	Czech	5	5	0	933
dress	1	2.96154	šaty	Czech	4	4	0
drum	1	3.46154	buben	Czech	5	5	0	26
duck	1	2.92308	kachna	Czech	5	6	0	111
dummy	1	2	dudlík	Czech	6	6	0	7
ear	1	2.11538	ucho	Czech	3	4	0	337
elephant	1	2.80769	slon	Czech	4	4	0	45
envelope	1	4.42308	obálka	Czech	6	6	0	92
eye	1	2.11538	oko	Czech	3	3	0	889
feather	1	4.11538	pero	Czech	4	4	0	22
fish	1	2.61538	ryba	Czech	4	4	0	415
flag	1	4.84615	vlajka	Czech	6	6	0	62
flower	1	2.69231	květina	Czech	8	7	0	15
fly	1	2.80769	moucha	Czech	4	6	0	98
fork	1	2.76923	vidlička	Czech	8	8	0	41
frog	1	2.76923	žába	Czech	4	4	0	45
frying pan	1	4.26923	pánev	Czech	5	5	0	50
gate	1	4.23077	brána	Czech	5	5	0	125
giraffe	1	3.23077	žirafa	Czech	6	6	0	20
glass	1	3.42308	sklenice	Czech	8	8	0	59
glasses	1	3.46154	brýle	Czech	5	5	0	439
goat	1	2.80769	koza	Czech	4	4	0	130
guitar	1	4.07692	kytara	Czech	6	6	0	158
gun	1	4.57692	pistole	Czech	7	7	0	26
hat	1	3.42308	klobouk	Czech	6	7	0	69
heart	1	3.30769	srdce	Czech	5	5	0	182
helicopter	1	4.26923	vrtulník	Czech	8	8	0	45
Hen	1	2.65385	slepice	Czech	7	7	0	146
horse	1	2.61538	kůň	Czech	3	3	0	396
house	1	2.38462	dům	Czech	3	3	0	978
iron	1	4.57692	žehlička	Czech	8	8	0	40
kangaroo	1	3.80769	klokan	Czech	6	6	0	1
key	1	3.15385	klíč	Czech	4	4	0	308
knife	1	2.96154	nůž	Czech	3	3	0	138
ladder	1	5.76923	štafle	Czech	6	6	0	26
lamp	1	3.30769	lampa	Czech	5	5	0	59
leaf	1	3.26923	list	Czech	4	4	0	163
leg	1	2.26923	noha	Czech	4	4	0	1375
lemon	1	3.19231	citron	Czech	6	6	0	26
lighter	1	5.53846	zapalovač	Czech	9	9	0	43
lion	1	2.88462	lev	Czech	3	3	0	26
lipstick	1	5.30769	rtěnka	Czech	6	6	0	17
match	1	4.23077	sirky	Czech	5	5	0
monkey	1	2.88462	opice	Czech	5	5	0	50
moon	1	3.5	měsíc	Czech	6	5	0	1659
motorbike	1	3.69231	motorka	Czech	7	7	0	176
mouse	1	2.57692	myš	Czech	3	3	0	172
mushroom	1	5.46154	žampion	Czech	7	7	0	24
needle	1	4.07692	jehla	Czech	5	5	0	51
nest	1	4	hnízdo	Czech	6	6	0	43
newspaper	1	3.88462	noviny	Czech	6	6	0	379
nose	1	1.96154	nos	Czech	3	3	0	181
onion	1	3.38462	cibule	Czech	6	6	0	103
orange	1	3	pomeranč	Czech	8	8	0	78
owl	1	3.42308	sova	Czech	4	4	0	14
paintbrush	1	3.76923	štětec	Czech	6	6	0	13
pear	1	2.73077	hruška	Czech	6	6	0	76
pen	1	4.42308	propiska	Czech	8	8	0	28
pencil	1	2.96154	tužka	Czech	5	5	0	110
penguin	1	3.76923	tučňák	Czech	6	6	0	9
pineapple	1	4.07692	ananas	Czech	6	6	0	16
pizza	1	6.15385	pizza	Czech	5	5	0	140
postman	1	4.38462	pošťák	Czech	6	6	0	7
rabbit	1	2.84615	králík	Czech	6	6	0	111
racket	1	4.69231	raketa	Czech	6	6	0	33
rainbow	1	3.23077	duha	Czech	4	4	0	41
roof	1	3.57692	střecha	Czech	6	7	0	351
ruler	1	4.84615	pravítko	Czech	8	8	0	10
sandwich	1	6.26923	sendvič	Czech	7	7	0	8
saw	1	4.26923	pila	Czech	4	4	0	152
scale	1	4.65385	váha	Czech	4	4	0	122
scarf	1	3.38462	šála	Czech	4	4	0	26
scissors	1	3.5	nůžky	Czech	5	5	0	55
sewing machine	1	5.07692	šicí stroj	Czech	10	10	1
shirt	1	4.46154	košile	Czech	6	6	0	143
shoe	1	2.38462	bota	Czech	4	4	0	680
slide	1	3.5	skluzavka	Czech	9	9	0	4
snail	1	2.92308	šnek	Czech	4	4	0	24
snake	1	2.88462	had	Czech	3	3	0	76
snowman	1	3.03846	sněhulák	Czech	8	8	1	14
sock	1	2.76923	ponožka	Czech	7	7	0	158
sofa	1	3.69231	gauč	Czech	3	4	0	109
spoon	1	2.30769	lžíce	Czech	5	5	0	67
squirrel	1	3.26923	veverka	Czech	7	7	0	23
stairs	1	2.88462	schody	Czech	5	6	0
star	1	3.07692	hvězda	Czech	7	6	0	127
stool	1	3.53846	stolička	Czech	8	8	0	20
strawberry	1	2.73077	jahoda	Czech	6	6	0	159
sun	1	2.30769	slunce	Czech	6	6	0	128
sunglasses	1	4.73077	sluneční brýle	Czech	14	14	1	28
sweater	1	3.15385	svetr	Czech	5	5	0	130
swing	1	2.96154	houpačka	Czech	7	8	0	30
tail	1	2.92308	ocas	Czech	4	4	0	80
tank	1	5	tank	Czech	4	4	0	45
telephone	1	3.69231	telefon	Czech	7	7	0	754
television	1	3.15385	televize	Czech	8	8	0	1023
tennis ball	1	2.46154	míček	Czech	5	5	0	18
thermometer	1	4.5	teploměr	Czech	9	8	1	21
tie	1	5.23077	kravata	Czech	7	7	0	41
tiger	1	3.23077	tygr	Czech	4	4	0	29
tomato	1	3.03846	rajče	Czech	5	5	0	137
tractor	1	3.65385	traktor	Czech	7	7	0	121
tree	1	2.15385	strom	Czech	5	5	0	397
trousers	1	2.76923	kalhoty	Czech	7	7	0	290
truck	1	4.53846	kamión	Czech	6	6	0	117
turtle	1	3.23077	želva	Czech	5	5	0	41
umbrella	1	3.73077	deštník	Czech	7	7	0	59
vest	1	4.11538	vesta	Czech	5	5	0	43
wardrobe	1	3.19231	skříň	Czech	5	5	0	306
watch	1	3.80769	hodinky	Czech	7	7	0	132
watermelon	1	3.5	meloun	Czech	5	6	0	50
wave	1	4.23077	vlna	Czech	4	4	0	143
whistle	1	3.92308	píšťalka	Czech	8	8	0	7
zebra	1	3.38462	zebra	Czech	5	5	0	8
bark	2	2.57692	štěkat	Czech	5	5	0	148
bath	2	2.46154	koupat se	Czech	6	7	1	171
beg	2	5.84615	žebrat	Czech	5	5	0	12
bite	2	2.84615	kousat	Czech	5	5	0	78
blow	2	3	foukat	Czech	4	5	0	137
boil	2	4.11538	vařit se	Czech	6	6	1
box	2	5.73077	boxovat	Czech	7	6	0	4
brush [teeth]	2	3.73077	čistit	Czech	5	5	0	135
build	2	2.88462	stavět	Czech	5	5	0	379
burn	2	4.03846	hořet	Czech	4	4	0	137
burst	2	4.03846	prasknout	Czech	7	7	0	118
carry	2	3.34615	nést	Czech	4	4	0	338
carve	2	5.23077	vyřezávat	Czech	8	8	0	11
clap	2	2.80769	tleskat	Czech	6	6	0	27
clean	2	5.46154	leštit	Czech	5	5	0	9
climb	2	2.92308	lézt	Czech	4	4	0	651
comb	2	3.23077	česat se	Czech	6	6	1	26
conduct	2	6.96154	dirigovat	Czech	8	8	0	14
cook	2	2.96154	vařit	Czech	4	4	0	930
crawl	2	2.92308	lézt	Czech	4	4	0	651
cry	2	2.5	plakat	Czech	5	5	0	68
cut	2	3.73077	stříhat	Czech	6	6	0	75
dance	2	3.15385	tančit	Czech	5	5	0	92
dig	2	2.92308	kopat	Czech	4	4	0	125
dive	2	2.53846	skákat	Czech	5	5	0	247
drag	2	3.92308	táhnout	Czech	5	5	0	262
draw	2	2.84615	kreslit	Czech	6	6	0	89
drill	2	4.73077	vrtat	Czech	4	4	0	65
drink	2	2.23077	pít	Czech	4	4	0	1198
drip	2	3.96154	kapat	Czech	4	4	0	42
drive	2	4.03846	řídit	Czech	4	4	0	291
drown	2	4.57692	topit se	Czech	6	6	1	263
dry	2	5	fénovat	Czech	6	6	0	6
eat	2	2.23077	jíst	Czech	2	2	0	1242
erupt	2	7.84615	soptit	Czech	5	5	0	4
extinguish	2	4.57692	hasit	Czech	4	4	0	9
fall	2	2.84615	padat	Czech	4	4	0	325
feed	2	3.15385	krmit	Czech	4	4	0	120
fight	2	3.73077	prát se	Czech	7	7	1
file	2	5.69231	pilovat	Czech	6	6	0	4
fish	2	4.73077	rybařit	Czech	6	6	0	5
fly	2	3.34615	letět	Czech	4	4	0	715
fry	2	5	smažit	Czech	5	5	0	46
glue	2	3.88462	lepit	Czech	4	4	0	77
grate	2	4.46154	strouhat	Czech	6	7	0	20
grill	2	6.42308	grilovat	Czech	7	7	0	50
hammer	2	5	zatloukat	Czech	7	8	0	8
hatch	2	5.46154	líhnout se	Czech	8	8	1	4
hitchhike	2	6.61538	stopovat	Czech	7	7	0	29
hug	2	3.5	objímat	Czech	6	6	0	14
hunt	2	4.65385	střílet	Czech	6	6	0	191
iron	2	4.34615	žehlit	Czech	5	5	0	91
jump	2	2.53846	skákat	Czech	5	5	0
kick	2	2.92308	kopat	Czech	4	4	0	125
kiss	2	4.03846	políbit	Czech	6	6	0	26
knit	2	4.57692	plést	Czech	5	5	0	246
knock	2	3.38462	ťukat	Czech	4	4	0	49
laugh	2	2.57692	smát se	Czech	8	7	1	594
lick	2	2.88462	lízat	Czech	4	4	0	25
light	2	4.61538	zapalovat	Czech	8	8	0	142
listen	2	2.88462	poslouchat	Czech	7	9	0	827
marry	2	5.88	brát se	Czech	7	7	1	2635
massage	2	5.80769	masírovat	Czech	8	8	0	32
measure	2	4.73077	měřit	Czech	5	4	0	198
melt	2	5.07692	tát	Czech	4	4	0	15
milk	2	4.96154	dojit	Czech	4	4	0	67
mix	2	5.80769	mixovat	Czech	7	6	0	19
mop	2	4.53846	vytírat	Czech	6	6	0	38
open	2	3.15385	otvírat	Czech	6	6	0	20
operate	2	6.15385	operovat	Czech	7	7	0	60
paint	2	2.84615	malovat	Czech	6	6	0	213
pee	2	2.19231	čůrat	Czech	4	4	0	40
peel	2	4.07692	loupat	Czech	4	5	0	26
photograph	2	4.26923	fotit	Czech	4	4	0	372
pick	2	3.42308	trhat	Czech	4	4	0	115
pinch	2	3.92308	štípat	Czech	5	5	0	34
plant	2	5.07692	sázet	Czech	4	4	0	101
play [the piano]	2	2.57692	hrát	Czech	5	5	0	3355
play golf	2	7.69231	hrát golf	Czech	10	10	1
plow	2	6.26923	orat	Czech	3	3	0	18
post	2	4.38462	posílat	Czech	6	6	0	410
pour	2	3.53846	nalévat	Czech	6	6	0	63
pull	2	3.38462	tahat	Czech	4	4	0	375
push	2	3.61538	tlačit	Czech	5	5	0	168
rain	2	2.92308	pršet	Czech	4	4	0	465
rake	2	3.76923	hrabat	Czech	5	5	0	122
read	2	3.26923	číst	Czech	3	3	0	1626
ride [a horse]	2	3.15385	jezdit	Czech	5	5	0	3476
ring	2	3.30769	zvonit	Czech	5	5	0	171
roast	2	3.76923	péct	Czech	4	4	0
row	2	6.07692	veslovat	Czech	7	7	0	4
run	2	2.76923	běžet	Czech	5	4	0	794
sail	2	6.57692	plachtit	Czech	6	7	0	4
saw	2	4.07692	řezat	Czech	4	4	0	125
search	2	3.07692	hledat	Czech	5	5	0	817
sew	2	4.26923	šít	Czech	4	4	0	113
sharpen	2	5.61538	brousit	Czech	5	6	0	49
shave	2	4.80769	holit se	Czech	7	7	1
shear	2	3.73077	stříhat	Czech	6	6	0	43
shower	2	4.23077	sprchovat se	Czech	9	10	1	39
sing	2	2.61538	zpívat	Czech	5	5	0	482
sink	2	4.65385	potápět se	Czech	9	9	1	30
sit	2	2.42308	sedět	Czech	4	4	0	2318
skate	2	4.03846	bruslit	Czech	6	6	0	26
ski	2	4.53846	lyžovat	Czech	6	6	0	124
sleep	2	2.23077	spát	Czech	3	3	0	2051
slide	2	3.11538	klouzat se	Czech	7	8	1	82
slip	2	3.42308	uklouznout	Czech	7	8	0	16
smell	2	3.53846	čichat	Czech	4	5	0	3
snow	2	2.88462	sněžit	Czech	5	5	0	47
spill	2	3.19231	rozlít	Czech	7	7	0	25
spin	2	6.23077	příst	Czech	5	5	0	16
squeeze	2	3.65385	mačkat	Czech	5	5	0	103
steal	2	5.34615	krást	Czech	5	5	0	132
sting	2	3.38462	píchnout	Czech	5	6	0	137
stir	2	3.26923	míchat	Czech	4	5	0	109
stroke	2	2.96154	hladit	Czech	5	5	0	34
sunbath	2	4.92308	opalovat se	Czech	10	10	1	27
surf	2	8.30769	surfovat	Czech	7	7	0	10
sweat	2	4.84615	potit se	Czech	7	7	1	62
sweep	2	3.92308	zametat	Czech	6	6	0	26
swim	2	3.34615	plavat	Czech	5	5	0	194
swing	2	2.80769	houpat se	Czech	7	7	1	32
talk [on the phone]	2	3.07692	povídat si	Czech	9	9	1	2253
tear	2	3.42308	trhat	Czech	4	4	0
throw	2	3.69231	vyhodit	Czech	6	6	0	832
tie	2	3.69231	zavazovat	Czech	8	8	0	16
type	2	3.42308	psát	Czech	4	4	0	2872
vacuum	2	4.30769	vysávat	Czech	6	6	0	28
wake up	2	2.92308	vstávat	Czech	6	6	0	396
walk	2	2.42308	jít	Czech	3	3	0	23201
wash [clothes]	2	3.88462	prát	Czech	4	4	0	261
watch [TV]	2	2.76923	dívat se	Czech	7	7	1	1451
water	2	3.65385	zalévat	Czech	6	6	0	102
wave	2	2.61538	mávat	Czech	4	4	0	66
weigh	2	4.46154	vážit	Czech	4	4	0	189
whisper	2	3.57692	šeptat	Czech	5	5	0	13
whistle	2	3.65385	pískat	Czech	5	5	0	54
wink	2	3.46154	mrkat	Czech	4	4	0	14
write	2	3.42308	psát	Czech	4	4	0	2872
airplane	1	6.57143	itealan	Gaelic	6	7	0
ant	1	8.61905	seangan	Gaelic	6	7	0
apple	1	3.42857	ubhal	Gaelic	3	5	0
axe	1	7.42857	tuagh	Gaelic	3	5	0
ball	1	3.71429	ball(a)	Gaelic	4	5	0
balloon	1	4.90476	bailiùn/balùn	Gaelic	5	7	0
banana	1	3.61905	banana	Gaelic	6	6	0
barrel	1	6.28571	baraille	Gaelic	6	8	0
basket	1	4.2381	basgaid	Gaelic	6	7	0
battery	1	7.28571	bataraidh	Gaelic	6	9	0
bear	1	6.09524	mathan	Gaelic	5	6	0
bed	1	3.14286	leabaidh	Gaelic	4	8	0
bell	1	4.95238	clag	Gaelic	4	4	0
belt	1	9.28571	crios	Gaelic	4	5	0
bicycle	1	4	baidhsagal	Gaelic	7	10	0
bird	1	3.33333	eun	Gaelic	3	3	0
blackboard	1	5.71429	bòrd-dubh	Gaelic	7	9	1
bone	1	4.38095	cnàimh	Gaelic	4	6	0
boot	1	4.19048	bòtainn	Gaelic	5	7	0
bottle	1	2.90476	botal	Gaelic	5	5	0
broom	1	4	sguab	Gaelic	4	5	0
brush	1	3.47619	bruis	Gaelic	4	5	0
bus	1	3.42857	bus	Gaelic	3	3	0
butterfly	1	5.42857	dealan-dè	Gaelic	7	9	1
button	1	4.09524	putan	Gaelic	5	5	0
candle	1	4.42857	coinneal	Gaelic	5	8	0
car	1	3.71429	càr	Gaelic	3	3	0
carrot	1	3.28571	curran	Gaelic	5	6	0
cat	1	3	cat	Gaelic	3	3	0
chain	1	6.71429	sèine	Gaelic	4	5	0
chair	1	4.80952	sèithear	Gaelic	4	8	0
cheese	1	3.38095	càis(e)	Gaelic	4	5	0
clock	1	3.85714	gleoc/cleoc	Gaelic	4	5	0
cloud	1	4.09524	sgòth	Gaelic	3	5	0
comb	1	4.66667	cìr	Gaelic	3	3	0
computer	1	10.4286	coimpiutair	Gaelic	9	11	0
cow	1	3.80952	bò	Gaelic	2	2	0
crocodile	1	10.5714	crogall	Gaelic	6	7	0
cucumber	1	13.619	cularan	Gaelic	7	7	0
desk	1	4.57143	deasg	Gaelic	4	5	0
dog	1	3.38095	cù	Gaelic	2	2	0
doll	1	4.42857	doileag	Gaelic	5	7	0
door	1	3.38095	doras	Gaelic	5	5	0
dress	1	3.42857	dreasa	Gaelic	5	6	0
drum	1	4.57143	druma	Gaelic	5	5	0
duck	1	4.38095	tunnag	Gaelic	5	6	0
dummy	1	5.52381	dumaidh	Gaelic	4	7	0
ear	1	3.80952	cluas	Gaelic	4	5	0
elephant	1	8.47619	ailbhean	Gaelic	6	8	0
envelope	1	7.61905	cèis	Gaelic	3	4	0
eye	1	3.47619	sùil	Gaelic	3	4	0
feather	1	4.47619	ite	Gaelic	3	3	0
fish	1	2.95238	iasg	Gaelic	3	4	0
flag	1	5.61905	bratach	Gaelic	6	7	0
flower	1	3.7619	flùr	Gaelic	4	4	0
fly	1	3.85714	cuileag	Gaelic	5	7	0
fork	1	3.61905	forca	Gaelic	5	5	0
frog	1	7.2381	losgann	Gaelic	6	7	0
gate	1	4	geata	Gaelic	4	5	0
giraffe	1	8.85714	sioraf	Gaelic	5	6	0
glass	1	4.04762	glainne	Gaelic	5	7	0
glasses	1	4.38095	speuclairean	Gaelic	9	12	0
goat	1	5.09524	gobhar	Gaelic	4	6	0
guitar	1	5.85714	giotàr	Gaelic	5	6	0
gun	1	5.2381	gunna	Gaelic	4	5	0
hat	1	3.66667	ad	Gaelic	2	2	0
heart	1	4.47619	cridhe	Gaelic	4	6	0
helicopter	1	5.47619	heileacoptair	Gaelic	10	13	0
Hen	1	3.61905	cearc	Gaelic	4	5	0
horse	1	3.19048	each	Gaelic	3	4	0
house	1	3.38095	taigh	Gaelic	3	5	0
iron	1	4.90476	iarann	Gaelic	4	6	0
kangaroo	1	6.7619	cangarù	Gaelic	7	7	0
key	1	4.71429	iuchair	Gaelic	5	7	0
knife	1	3.52381	sgian	Gaelic	4	5	0
ladder	1	4.42857	àradh	Gaelic	4	5	0
lamp	1	4.28571	lampa	Gaelic	5	5	0
leaf	1	4.42857	duilleag	Gaelic	5	8	0
leg	1	2.95238	cas	Gaelic	3	3	0
lemon	1	8.71429	liomaid	Gaelic	5	7	0
lighter	1	12.7619	lasadair	Gaelic	7	8	0
lion	1	4.57143	leòmhann	Gaelic	4	8	0
match	1	5	maids(e)	Gaelic	5	6	0
monkey	1	4.2381	muncaidh	Gaelic	5	8	0
moon	1	3.7619	gealach	Gaelic	5	7	0
motorbike	1	5.95238	motair-baidhsagal	Gaelic	12	17	1
mouse	1	3.66667	luch	Gaelic	3	4	0
mushroom	1	8.7619	balgan-buachair	Gaelic	12	15	1
needle	1	5.52381	snàthad	Gaelic	5	7	0
nest	1	4.38095	nead	Gaelic	3	4	0
newspaper	1	5.2381	pàipear-naidheachd	Gaelic	10	18	1
nose	1	3.33333	sròn	Gaelic	5	4	0
onion	1	4.28571	uinnean	Gaelic	4	7	0
orange	1	3.85714	oraindsear	Gaelic	8	10	0
owl	1	4.52381	cailleach-oidhche	Gaelic	8	17	1
paintbrush	1	4.80952	bruis-pheant	Gaelic	8	12	1
pear	1	5.14286	peur	Gaelic	3	4	0
pen	1	4	peann	Gaelic	4	5	0
pencil	1	3.71429	peansail	Gaelic	6	8	0
penguin	1	11.619	ceann-fionn	Gaelic	6	11	1
pineapple	1	12.6667	anann	Gaelic	4	5	0
pizza	1	10.4762	piotsa	Gaelic	5	6	0
postman	1	3.95238	post(a)	Gaelic	5	5	0
rabbit	1	5.04762	rabaid	Gaelic	5	6	0
racket	1	6.7619	racaid	Gaelic	5	6	0
rainbow	1	4.80952	bogha-frois	Gaelic	7	11	1
roof	1	3.95238	mullach	Gaelic	5	7	0
ruler	1	5.14286	rùilear	Gaelic	5	7	0
sandwich	1	11.619	ceapaire	Gaelic	6	8	0
saw	1	4.61905	sàbh	Gaelic	3	4	0
scale	1	12.2381	meidh	Gaelic	3	5	0
scarf	1	8.80952	stoc	Gaelic	4	4	0
scissors	1	4.57143	siosar	Gaelic	5	6	0
sewing machine	1	12.8095	inneal-fuaigheil	Gaelic	9	16	1
shirt	1	3.85714	lèine	Gaelic	4	5	0
shoe	1	3.57143	bròg	Gaelic	4	4	0
slide	1	10.3333	sleamhnag	Gaelic	6	9	0
snail	1	5.19048	seilcheag	Gaelic	7	9	0
snake	1	5.47619	nathair	Gaelic	5	7	0
snowman	1	4.33333	bodach-sneachda	Gaelic	11	15	1
sock	1	3.47619	stocainn	Gaelic	6	8	0
sofa	1	3.38095	sòfa	Gaelic	4	4	0
spoon	1	3.33333	spàin	Gaelic	4	5	0
squirrel	1	7.14286	feòrag	Gaelic	6	6	0
stairs	1	3.85714	staidhre	Gaelic	5	8	0
star	1	3.90476	rionnag	Gaelic	5	7	0
stool	1	6.52381	stòl	Gaelic	4	4	0
strawberry	1	10.0952	sùbh-làir	Gaelic	5	9	1
sun	1	3.38095	grian	Gaelic	4	5	0
sunglasses	1	8.90476	speuclairean-grèine	Gaelic	14	19	1
sweater	1	5.14286	geansaidh	Gaelic	5	9	0
swing	1	9.28571	dreallag	Gaelic	6	8	0
tail	1	3.80952	earball	Gaelic	6	7	0
tank	1	6.19048	tanca	Gaelic	5	5	0
telephone	1	5.19048	fòn	Gaelic	3	3	0
television	1	5.66667	telebhisean	Gaelic	9	11	0
tennis ball	1	6.57143	ball teanais	Gaelic	8	11	1
thermometer	1	12.4286	teas-mheidh	Gaelic	6	11	1
tie	1	4.33333	tàidh	Gaelic	3	5	0
tiger	1	5	tìgear	Gaelic	5	6	0
tomato	1	4.04762	tomàto	Gaelic	6	6	0
toothbrush	1	4.57143	bruis-fhiaclan	Gaelic	9	14	1
tractor	1	3.61905	tractar	Gaelic	7	7	0
tree	1	3.80952	craobh	Gaelic	4	6	0
trousers	1	3.28571	briogais	Gaelic	6	8	0
truck	1	3.66667	làraidh	Gaelic	4	7	0
turtle	1	11.9524	turtar	Gaelic	6	6	0
umbrella	1	9.2381	sgàilean	Gaelic	6	8	0
vest	1	9.52381	siosacot	Gaelic	7	8	0
wardrobe	1	6.7619	preas-aodaich	Gaelic	8	13	1
watch	1	5.33333	uaireadair	Gaelic	6	10	0
watermelon	1	13.7619	meal-bhuc uisge	Gaelic	12	13	1
wave	1	5.85714	tonn	Gaelic	3	4	0
whistle	1	5.2381	fead(ag)	Gaelic	5	6	0
zebra	1	9.14286	sìobra	Gaelic	5	6	0
bark	2	4.14286	a’comhartaich	Gaelic	8	13	0
bath	2	11.9524	agionnlaid	Gaelic	7	10	0
beg	2	9.2381	a'baigeireachd	Gaelic	9	14	0
bite	2	4.38095	a’bìdeadh	Gaelic	6	9	0
blow	2	4.71429	a’sèideadh	Gaelic	6	10	0
boil	2	4.90476	a’goil	Gaelic	4	6	0
box	2	5.66667	a’bogsadh	Gaelic	7	9	0
brush [teeth]	2	4.38095	a’bruiseadh	Gaelic	7	11	0
build	2	3.66667	a’togail	Gaelic	6	8	0
burn	2	4.66667	a’losgadh	Gaelic	7	9	0
burst	2	6.19048	a’spreadhadh	Gaelic	7	12	0
carry	2	5.61905	a’giùlan	Gaelic	6	8	0
carve	2	7.90476	a’snaigheadh	Gaelic	7	12	0
clap	2	6.80952	a’bualadhbhasan	Gaelic	11	15	1
clean	2	4.19048	a’glanadh	Gaelic	7	9	0
climb	2	4.90476	a’sreap	Gaelic	5	7	0
comb	2	4.38095	a’cìreadh	Gaelic	6	9	0
conduct	2	6.52381	a’stiùireadh	Gaelic	7	12	0
cook	2	4.04762	a’còcaireachd	Gaelic	9	13	0
cry	2	5.14286	a’rànaich	Gaelic	6	9	0
cut	2	4	a’gearradh	Gaelic	6	10	0
dance	2	4.04762	a’dannsa	Gaelic	5	8	0
dig	2	4.57143	a’cladhach	Gaelic	6	10	0
dive	2	5.52381	a’dàibheadh	Gaelic	6	11	0
draw	2	3.95238	a’dèanamhdealbh	Gaelic	11	15	1
drill	2	4.47619	a’slaodadh	Gaelic	7	10	0
drink	2	3.61905	agòl	Gaelic	4	4	0
drip	2	5.38095	a’sileadh	Gaelic	6	9	0
drive	2	4.28571	a’dràibheadh	Gaelic	7	12	0
drown	2	5.66667	a’bàthadh	Gaelic	6	9	0
dry	2	3.95238	a’tiormachadh	Gaelic	10	13	0
eat	2	3.85714	agithe	Gaelic	5	6	0
erupt	2	6.19048	a’spreadhadh	Gaelic	7	12	0
extinguish	2	5.7619	a’curàs	Gaelic	6	7	0
fall	2	4.04762	a’tuiteam	Gaelic	6	9	0
feed	2	5.19048	a’biathadh	Gaelic	6	10	0
fight	2	4.42857	a’sabaid	Gaelic	6	8	0
file	2	10.8571	a’faidhligeadh	Gaelic	8	14	0
fish	2	4.38095	agiasgach	Gaelic	7	9	0
fly	2	7.19048	a’sgèith	Gaelic	4	8	0
fry	2	5.95238	a’fraighigeadh	Gaelic	8	14	0
glue	2	6.04762	a’glaodhadh	Gaelic	6	11	0
hammer	2	5.33333	a’bualadhleòrd	Gaelic	11	14	1
hitchhike	2	9.19048	a’falbhairanòrdaig	Gaelic	15	18	1
hug	2	6.19048	a’glacadhteannair	Gaelic	12	17	0
hunt	2	5.61905	a’sealg	Gaelic	6	7	0
iron	2	5.14286	agiarnaigeadh	Gaelic	9	13	0
jump	2	3.61905	a’leum	Gaelic	4	6	0
kick	2	4.42857	a’breabadh	Gaelic	7	10	0
kiss	2	3.90476	a’pògadh	Gaelic	6	8	0
knit	2	4.52381	a’fighe	Gaelic	4	7	0
knock	2	4.14286	a’gnogadh	Gaelic	7	9	0
laugh	2	4	a’gàireachdainn	Gaelic	9	15	0
lick	2	4.2381	agimlich	Gaelic	8	8	0
light	2	5.19048	a’lasadh	Gaelic	6	8	0
listen	2	4	agèisteachd	Gaelic	8	11	0
marry	2	5.09524	a’pòsadh	Gaelic	6	8	0
massage	2	4.47619	a’suathadh	Gaelic	6	10	0
measure	2	4.95238	a’tomhas	Gaelic	5	8	0
melt	2	4.47619	a’leaghadh	Gaelic	5	10	0
milk	2	4.57143	a’bleoghan	Gaelic	6	10	0
mix	2	5.85714	a’measgachadh	Gaelic	9	13	0
mop	2	4.95238	a’glanadhanlàir	Gaelic	12	15	1
open	2	4.04762	a’fosgladh	Gaelic	8	10	0
operate	2	5.61905	a’dèanamhopairèisean	Gaelic	14	20	1
paint	2	4.14286	a’peantadh	Gaelic	7	10	0
pee	2	4.47619	a’mùin	Gaelic	4	6	0
peel	2	5.14286	a’rùsgadh	Gaelic	7	9	0
photograph	2	5.14286	a’togaildealbh	Gaelic	11	14	1
pick	2	3.66667	a’togail	Gaelic	6	8	0
pinch	2	4.66667	a’toirtbìdeagà	Gaelic	11	14	1
plant	2	4.33333	a’cur	Gaelic	4	5	0
play [the piano]	2	3.61905	a’cluich(e)	Gaelic	6	10	0
play golf	2	5.71429	a’cluichegoilf	Gaelic	10	14	1
plow	2	5.61905	a’treabhadh	Gaelic	7	11	0
post	2	4.14286	a’postadh	Gaelic	7	9	0
pour	2	4.47619	a’dòrtadh	Gaelic	7	9	0
pull	2	4.47619	a’slaodadh	Gaelic	7	10	0
push	2	4.38095	a’putadh	Gaelic	6	8	0
rain	2	4.47619	a’dòrtadh	Gaelic	7	9	0
rake	2	5.90476	a’ràcadh	Gaelic	6	8	0
read	2	3.80952	a’leughadh	Gaelic	6	10	0
ride [a horse]	2	6.95238	a’marcadh	Gaelic	7	9	0
ring	2	11.0952	a’bruthadha'chluig	Gaelic	11	18	1
roast	2	5.42857	a’ròstadh	Gaelic	7	9	0
row	2	5.57143	agiomradh	Gaelic	8	9	0
run	2	3.66667	a’ruith	Gaelic	4	7	0
sail	2	4.38095	a’seòladh	Gaelic	6	9	0
saw	2	4.85714	a’sàbhadh	Gaelic	6	9	0
search	2	5.04762	a’lorg	Gaelic	6	6	0
sew	2	5.19048	a’fuaigheal	Gaelic	6	11	0
sharpen	2	6.52381	a’geurachadh	Gaelic	8	12	0
shave	2	9.90476	a’bearradh	Gaelic	6	10	0
shear	2	5.14286	a’rùsgadh	Gaelic	7	9	0
shower	2	8.57143	a’gabhailfras	Gaelic	9	13	0
sing	2	3.71429	a’seinn	Gaelic	4	7	0
sink	2	5.04762	a’dolfodha	Gaelic	7	10	1
sit	2	3.52381	a’suidhe	Gaelic	5	8	0
skate	2	12.0476	a’spèileadh	Gaelic	7	11	0
ski	2	7.42857	a’sgitheadh	Gaelic	6	11	0
sleep	2	3.66667	a’cadal	Gaelic	6	7	0
slide	2	9.57143	a’sleamhnachadh	Gaelic	9	15	0
slip	2	4.04762	a’tuiteam	Gaelic	6	9	0
smell	2	5.90476	a’togailfàileadh	Gaelic	11	16	1
smoke	2	5.38095	a’smocadh	Gaelic	7	9	0
snow	2	4.2381	a’curant-sneachda	Gaelic	12	17	1
spill	2	4.47619	a’dòrtadh	Gaelic	7	9	0
squeeze	2	8.33333	a’fàsgadh	Gaelic	7	9	0
steal	2	5.47619	a’goid	Gaelic	4	6	0
sting	2	13.7143	a’guineadh	Gaelic	6	10	0
stir	2	5.85714	a’measgachadh	Gaelic	9	13	0
stroke	2	5.28571	a’slìobadh	Gaelic	7	10	0
sunbath	2	7.19048	a’gabhailnagrèine	Gaelic	12	17	1
surf	2	9.04762	a’surfadh	Gaelic	7	9	0
sweat	2	6.09524	a’curfallas	Gaelic	9	11	1
sweep	2	4.42857	a’sguabadh	Gaelic	7	10	0
swim	2	4.47619	a’snàmh	Gaelic	5	7	0
talk [on the phone]	2	3.47619	a’bruidheann	Gaelic	6	12	0
tear	2	4.95238	a’sracadh	Gaelic	7	9	0
throw	2	4	a’tilgeil	Gaelic	8	9	0
tie	2	4.47619	a’ceangal	Gaelic	7	9	0
type	2	13.619	a’clò-sgrìobhadh	Gaelic	11	16	1
wake up	2	3.7619	a’dùsgadh	Gaelic	7	9	0
walk	2	3.28571	a’coiseachd	Gaelic	7	11	0
wash [clothes]	2	3.61905	a’nighe	Gaelic	4	7	0
watch [TV]	2	3.38095	a’coimhead	Gaelic	5	10	0
water	2	8.38095	aguisgeachadh	Gaelic	9	13	0
wave	2	5.33333	a’smèideadh	Gaelic	7	11	0
weigh	2	4.95238	a’tomhas	Gaelic	5	8	0
whisper	2	9.2381	a’cagarsaich	Gaelic	9	12	0
whistle	2	4.71429	a’sèideadh	Gaelic	6	10	0
wink	2	6.38095	a’priobadh	Gaelic	7	10	0
write	2	4.61905	a’sgrìobhadh	Gaelic	8	12	0
ant	1	2.59524	namle	Lebanese Arabic	5	4	0
apple	1	1.97619	teffeha	Lebanese Arabic	7	5	0
axe	1	9.33333	ferra3a	Lebanese Arabic	7	5	0
ball	1	1.69048	tabe	Lebanese Arabic	4	4	0
banana	1	1.88095	mawze	Lebanese Arabic	4	4	0
barrel	1	5	barmi:l	Lebanese Arabic	6	5	0
basket	1	3.90476	salle	Lebanese Arabic	5	4	0
battery	1	4.28571	bettariye	Lebanese Arabic	7	6	0
bear	1	2.95238	debb	Lebanese Arabic	3	2	0
bed	1	2.11905	takhet	Lebanese Arabic	5	3	0
bell	1	3	jaras	Lebanese Arabic	5	3	0
belt	1	5.30952	zennar	Lebanese Arabic	6	4	0
bird	1	2.28571	3asfour	Lebanese Arabic	6	5	0
blackboard	1	3.42857	lo:h	Lebanese Arabic	3	3	0
bone	1	4.61905	3adme	Lebanese Arabic	5	4	0
boot	1	2.30952	bo:t	Lebanese Arabic	3	3	0
bottle	1	2.35714	'annine	Lebanese Arabic	6	5	0
broom	1	3.78571	mekense	Lebanese Arabic	7	5	0
bus	1	3.30952	autocar	Lebanese Arabic	6	6	1
butterfly	1	3.40476	fara:che	Lebanese Arabic	6	5	0
button	1	3.57143	zerr	Lebanese Arabic	3	2	0
candle	1	2.97619	cham3a	Lebanese Arabic	5	4	0
carrot	1	3.19048	jazra	Lebanese Arabic	5	4	0
cat	1	1.85714	bsayne	Lebanese Arabic	6	5	0
chair	1	2.30952	kerse	Lebanese Arabic	5	4	0
cheese	1	2.97619	jebneh	Lebanese Arabic	5	4	0
clock	1	3.80952	se:3a	Lebanese Arabic	4	4	0
cloud	1	4.2381	ghayme	Lebanese Arabic	4	4	0
comb	1	3.38095	mochet	Lebanese Arabic	5	3	0
computer	1	6.7619	computer	Lebanese Arabic	7	8	0
cow	1	3.07143	ba'ra	Lebanese Arabic	5	4	0
crocodile	1	5.38095	temse:h	Lebanese Arabic	6	5	0
cucumber	1	2.69048	khiya:ra	Lebanese Arabic	6	5	0
dog	1	2.19048	kaleb	Lebanese Arabic	5	3	0
doll	1	2.11905	le3be	Lebanese Arabic	5	4	0
door	1	2.07143	be:b	Lebanese Arabic	3	3	0
drum	1	4.85714	tabel	Lebanese Arabic	5	3	0
duck	1	3.14286	batta	Lebanese Arabic	4	3	0
ear	1	2.14286	dayne	Lebanese Arabic	5	4	0
elephant	1	3.40476	fi:l	Lebanese Arabic	3	3	0
envelope	1	5.7619	mghallaf	Lebanese Arabic	7	4	0
eye	1	2.14286	3ein	Lebanese Arabic	3	3	0
feather	1	5	ri:che	Lebanese Arabic	4	4	0
fish	1	2.59524	samke	Lebanese Arabic	5	4	0
flag	1	3.88095	3alam	Lebanese Arabic	5	3	0
flower	1	3.11905	zahra	Lebanese Arabic	5	4	0
fly	1	3.2381	ta:r	Lebanese Arabic
fork	1	2.90476	chawke	Lebanese Arabic	5	4	0
frog	1	4.33333	defda3a	Lebanese Arabic	7	5	0
gate	1	4.80952	bouwwe:be	Lebanese Arabic	7	5	0
giraffe	1	5.19048	zara:fe	Lebanese Arabic	6	5	0
glass	1	2.19048	kebbe:je	Lebanese Arabic	7	5	0
glasses	1	3.04762	3wayne:t	Lebanese Arabic	7	6	0
goat	1	4.54762	3anze	Lebanese Arabic	5	4	0
guitar	1	4.61905	guita:r	Lebanese Arabic	5	5	0
hat	1	3.14286	bornayta	Lebanese Arabic	8	6	0
heart	1	4.35714	aleb	Lebanese Arabic	5	3	0
helicopter	1	5.47619	helicopter	Lebanese Arabic	10	10	0
horse	1	3.57143	hsa:n	Lebanese Arabic	4	4	0
house	1	2.14286	be:t	Lebanese Arabic	3	3	0
iron	1	4.42857	mekwe:ye	Lebanese Arabic	7	6	0
kangaroo	1	6.14286	kangourou	Lebanese Arabic	6	6	0
key	1	3.04762	mefte:h	Lebanese Arabic	6	5	0
knife	1	3.04762	sekki:n	Lebanese Arabic	6	4	0
ladder	1	4.45238	sellom	Lebanese Arabic	6	3	0
lamp	1	5.14286	lampadaire	Lebanese Arabic	7	6	0
leaf	1	2.66667	war'a	Lebanese Arabic	4	4	0
leg	1	2.33333	ejer	Lebanese Arabic	4	3	0
lemon	1	3.85714	ha:mod	Lebanese Arabic	5	4	0
lighter	1	5.14286	edde:ha	Lebanese Arabic	6	5	0
lion	1	3.90476	asad	Lebanese Arabic	4	3	0
lipstick	1	4.78571	alam homra	Lebanese Arabic	10	7	1
match	1	5.04762	kabri:t	Lebanese Arabic	6	5	0
monkey	1	4	se3de:n	Lebanese Arabic	6	5	0
moon	1	3.33333	amar	Lebanese Arabic	4	3	0
mouse	1	3.42857	fa:ra	Lebanese Arabic	4	4	0
mushroom	1	6.19048	fotor	Lebanese Arabic	5	3	0
needle	1	4.61905	ebre	Lebanese Arabic	5	4	0
nest	1	5	3ech	Lebanese Arabic	3	2	0
nose	1	2.09524	menkha:r	Lebanese Arabic	6	5	0
onion	1	4.42857	basle	Lebanese Arabic	5	4	0
orange	1	3.28571	laymoune	Lebanese Arabic	7	6	0
owl	1	6.09524	bou:meh	Lebanese Arabic	4	4	0
paintbrush	1	5	ri:che	Lebanese Arabic	4	4	0
pear	1	3.90476	nja:sa	Lebanese Arabic	5	5	0
pen	1	2.57143	alam	Lebanese Arabic	5	3	0
pencil	1	3.33333	alam rsa:s	Lebanese Arabic	9	7	1
penguin	1	3.85714	pingouin	Lebanese Arabic	5	8	0
pizza	1	4.33333	pidza	Lebanese Arabic	4	5	0
postman	1	6.61905	se3ilbari:d	Lebanese Arabic	10	9	1
rabbit	1	3.11905	arnab	Lebanese Arabic	5	4	0
racket	1	5.28571	rake:t	Lebanese Arabic	5	5	0
roof	1	5.42857	sa'ef	Lebanese Arabic	4	3	0
ruler	1	3.83333	mastra	Lebanese Arabic	6	5	0
sandwich	1	3.09524	sandwich	Lebanese Arabic	6	8	0
saw	1	6.14286	mencha:r	Lebanese Arabic	6	5	0
scale	1	6.04762	mize:n	Lebanese Arabic	5	5	0
scissors	1	3.61905	m'ass	Lebanese Arabic	3	3	0
sewing machine	1	5.85714	makanet khiyata	Lebanese Arabic	9	9	1
shirt	1	3.52381	ami:s	Lebanese Arabic	4	4	0
shoe	1	2.95238	sobba:t	Lebanese Arabic	6	4	0
slide	1	3.45238	zehlayta	Lebanese Arabic	7	6	0
snail	1	4.95238	bezze:'a	Lebanese Arabic	7	5	0
snowman	1	4.33333	rajoul min al talj	Lebanese Arabic	14	9	1
sock	1	3.21429	kalse	Lebanese Arabic	4	4	0
sofa	1	3.33333	kanabe:ye	Lebanese Arabic	8	6	0
spoon	1	2.5	male3'a	Lebanese Arabic	6	5	0
squirrel	1	5.85714	senje:b	Lebanese Arabic	6	5	0
star	1	3.71429	nejme	Lebanese Arabic	5	4	0
stool	1	6.42857	tabouret	Lebanese Arabic	6	8	0
strawberry	1	3.64286	fraiz	Lebanese Arabic	4	4	0
sun	1	2.80952	chames	Lebanese Arabic	5	3	0
sunglasses	1	4.88095	3wayne:t chames	Lebanese Arabic	12	9	1
swing	1	3.11905	marjou:ha	Lebanese Arabic	7	6	0
tail	1	3.66667	danab	Lebanese Arabic	5	3	0
tank	1	5.19048	debbe:be	Lebanese Arabic	7	5	0
telephone	1	2.7381	telefone	Lebanese Arabic	7	5	0
tennis ball	1	5	ta:bet tennis	Lebanese Arabic	10	8	1
thermometer	1	4.19048	mize:n hara:ra	Lebanese Arabic	11	10	1
tie	1	5	caravate	Lebanese Arabic	6	7	0
tiger	1	4.71429	nemer	Lebanese Arabic	5	3	0
tomato	1	3	banadou:ra	Lebanese Arabic	8	6	0
toothbrush	1	3	ferche:yit sne:n	Lebanese Arabic	12	10	1
tractor	1	4.71429	tracteur	Lebanese Arabic	7	8	0
trousers	1	2.71429	pantalon	Lebanese Arabic	6	8	0
truck	1	3.59524	camion	Lebanese Arabic	5	6	0
turtle	1	3.71429	zelehfe	Lebanese Arabic	7	5	0
umbrella	1	3.78571	chamsiyye	Lebanese Arabic	7	5	0
watch	1	3.80952	se:3a	Lebanese Arabic	4	4	0
wave	1	4.80952	mawje	Lebanese Arabic	5	4	0
whistle	1	4.38095	soufayra	Lebanese Arabic	7	5	0
zebra	1	6.42857	zebr	Lebanese Arabic	4	5	0
bark	2	3.21429	3awwa	Lebanese Arabic	6	4	0
bath	2	2.2619	thammam	Lebanese Arabic	9	5	0
beg	2	6.2381	trajja	Lebanese Arabic	8	5	0
bite	2	3.28571	3add	Lebanese Arabic	5	3	0
blow	2	3	nafakh	Lebanese Arabic	6	4	0
boil	2	5.47619	ghele	Lebanese Arabic	5	4	0
box	2	2.66667	darab	Lebanese Arabic	6	4	0
brush [teeth]	2	3.11905	farcha lesse:n	Lebanese Arabic	11	10	1
burn	2	4.02381	htara'	Lebanese Arabic	8	5	0
burst	2	4.78571	fa'a3	Lebanese Arabic	5	4	0
carry	2	3	hamal	Lebanese Arabic	6	4	0
carve	2	6.7619	nahat	Lebanese Arabic	6	4	0
clap	2	2.11905	za''af	Lebanese Arabic	7	4	0
climb	2	3.47619	3arbach	Lebanese Arabic	7	5	0
comb	2	3.38095	mochet	Lebanese Arabic	7	4	0
cook	2	3.85714	tabakh	Lebanese Arabic	6	4	0
crawl	2	4.52381	dabdab	Lebanese Arabic	7	5	0
cry	2	2.16667	beke	Lebanese Arabic	5	4	0
cut	2	3.42857	ass	Lebanese Arabic	5	3	0
dance	2	3.02381	ra' as	Lebanese Arabic	7	4	0
dig	2	5	hafar	Lebanese Arabic	6	4	0
dive	2	5.95238	chakk	Lebanese Arabic	4	3	0
draw	2	3.14286	rasam	Lebanese Arabic	6	4	0
drill	2	5.95238	addah	Lebanese Arabic	7	4	0
drink	2	2.02381	cherib	Lebanese Arabic	6	4	0
drip	2	4.7619	na''at	Lebanese Arabic	6	4	0
drive	2	3.71429	se:'	Lebanese Arabic	4	4	0
drown	2	4.85714	gheri'	Lebanese Arabic	6	4	0
dry	2	3.35714	nachchaf	Lebanese Arabic	7	4	0
eat	2	1.95238	akal	Lebanese Arabic	5	4	0
erupt	2	5.71429	nfajar	Lebanese Arabic	8	5	0
extinguish	2	4.95238	taffa	Lebanese Arabic	6	4	0
fall	2	2.28571	wa'a3	Lebanese Arabic	5	4	0
feed	2	3.2381	ta3ma	Lebanese Arabic	6	5	0
fight	2	4.14286	tkhe:na'	Lebanese Arabic	8	6	0
fish	2	2.59524	samke	Lebanese Arabic	9	5	0
fly	2	3.2381	ta:r	Lebanese Arabic	4	4	0
fry	2	5.52381	ala	Lebanese Arabic	5	4	0
glue	2	3.38095	lazza'	Lebanese Arabic	7	4	0
grate	2	5.80952	barach	Lebanese Arabic	6	4	0
grill	2	5.42857	chewe	Lebanese Arabic	5	4	0
hammer	2	4.80952	da'	Lebanese Arabic	4	4	0
hitchhike	2	8.38095	wa'af autostop	Lebanese Arabic	13	12	1
hug	2	4.09524	ghamar	Lebanese Arabic	6	4	0
hunt	2	5.7619	tsayyad	Lebanese Arabic	9	5	0
iron	2	4.42857	mekwe:ye	Lebanese Arabic	5	4	0
jump	2	2.66667	natt	Lebanese Arabic	5	3	0
kick	2	4.33333	cha:t	Lebanese Arabic	4	4	0
kiss	2	2.45238	be:s	Lebanese Arabic	4	4	0
knit	2	4.7381	khayyat	Lebanese Arabic	7	4	0
knock	2	3.07143	da'	Lebanese Arabic	4	3	0
laugh	2	2.64286	dehik	Lebanese Arabic	6	4	0
lick	2	3.71429	lahas	Lebanese Arabic	6	4	0
light	2	4.80952	walla3	Lebanese Arabic	7	4	0
listen	2	3.09524	semi3	Lebanese Arabic	6	4	0
marry	2	5.28571	tjawwaz	Lebanese Arabic	9	5	0
massage	2	7.7619	3emil massage	Lebanese Arabic	11	13	1
measure	2	5.90476	ess	Lebanese Arabic	3	4	0
melt	2	5.14286	de:b	Lebanese Arabic	4	4	0
milk	2	6.38095	halab	Lebanese Arabic	6	4	0
mix	2	5.19048	khalat	Lebanese Arabic	6	4	0
mop	2	4.04762	massah	Lebanese Arabic	7	4	0
open	2	2.88095	fatah	Lebanese Arabic	6	4	0
operate	2	6.57143	3emil 3amaliyye	Lebanese Arabic	15	9	1
paint	2	5.95238	dahan	Lebanese Arabic	6	4	0
pee	2	2.42857	3emil pipi	Lebanese Arabic	10	8	1
peel	2	4.47619	achchar	Lebanese Arabic	5	4	0
photograph	2	4.19048	sawwar	Lebanese Arabic	7	4	0
pick	2	4.14286	attaf	Lebanese Arabic	6	4	0
pinch	2	4.40476	aras	Lebanese Arabic	6	4	0
plant	2	4.47619	zara3	Lebanese Arabic	6	4	0
play [the piano]	2	4.90476	da'	Lebanese Arabic	4	3	0
plow	2	5.52381	falah	Lebanese Arabic	6	4	0
post	2	5.38095	ba3at	Lebanese Arabic	6	4	0
pour	2	4.71429	sakab	Lebanese Arabic	6	4	0
pull	2	4.85714	sahab	Lebanese Arabic	6	4	0
push	2	3.80952	dafach	Lebanese Arabic	6	4	0
rain	2	3.02381	chatte	Lebanese Arabic	6	4	0
rake	2	3.7619	kannas	Lebanese Arabic	7	4	0
read	2	3.71429	ere	Lebanese Arabic	5	4	0
ride [a horse]	2	3.85714	rekib	Lebanese Arabic	6	4	0
ring	2	3.16667	rann	Lebanese Arabic	4	3	0
roast	2	4.38095	chewe	Lebanese Arabic	5	4	0
row	2	6.85714	jaddaf	Lebanese Arabic	7	4	0
run	2	3.07143	rakad	Lebanese Arabic	6	4	0
sail	2	5.04762	se:'	Lebanese Arabic	4	4	0
saw	2	6.14286	mencha:r	Lebanese Arabic	6	4	0
sew	2	4.7619	khayyat	Lebanese Arabic	7	4	0
sharpen	2	7.14286	sann	Lebanese Arabic	5	3	0
shave	2	5.14286	hala'	Lebanese Arabic	6	4	0
shear	2	6.95238	jazz	Lebanese Arabic	5	3	0
shower	2	2.28571	thammam	Lebanese Arabic	9	5	0
sing	2	2.7619	ghanna	Lebanese Arabic	6	4	0
sink	2	5.04762	gheri'	Lebanese Arabic	6	4	0
sit	2	2.38095	a3ad	Lebanese Arabic	6	4	0
skate	2	4.28571	3emil patin	Lebanese Arabic	10	9	1
ski	2	5.57143	3emil ski	Lebanese Arabic	9	6	1
sleep	2	1.90476	ne:m	Lebanese Arabic	4	4	0
slide	2	3.45238	zehlayta	Lebanese Arabic	9	6	0
slip	2	3.80952	zahhat	Lebanese Arabic	7	4	0
smell	2	2.90476	chamm	Lebanese Arabic	5	3	0
smoke	2	4.95238	dakhkhan	Lebanese Arabic	7	4	0
snow	2	4.66667	talajit	Lebanese Arabic	6	4	0
spill	2	4.57143	dala'	Lebanese Arabic	6	4	0
spin	2	6.38095	ghazal	Lebanese Arabic	6	4	0
squeeze	2	4.85714	3asar	Lebanese Arabic	6	4	0
steal	2	4.57143	sara'	Lebanese Arabic	6	4	0
sting	2	4.38095	3a'as	Lebanese Arabic	5	4	0
stir	2	4.2381	harrak	Lebanese Arabic	7	4	0
stroke	2	4.04762	halmas	Lebanese Arabic	7	5	0
sunbath	2	5.28571	tchammas	Lebanese Arabic	9	5	0
sweat	2	5.09524	3eri'	Lebanese Arabic	6	4	0
sweep	2	4.38095	kannas	Lebanese Arabic	7	4	0
swim	2	3.71429	tsabbah	Lebanese Arabic	9	5	0
swing	2	3.11905	marjou:ha	Lebanese Arabic	9	6	0
talk [on the phone]	2	3.59524	heke 3al telefone	Lebanese Arabic	15	12	1
tear	2	3.57143	khazza'	Lebanese Arabic	7	4	0
throw	2	2.95238	kabb	Lebanese Arabic	5	3	0
tie	2	5	caravate	Lebanese Arabic	6	4	0
type	2	6.09524	da'	Lebanese Arabic	4	3	0
vacuum	2	4.52381	kannas	Lebanese Arabic	7	4	0
wake up	2	3.2381	we3e	Lebanese Arabic	4	4	0
walk	2	2.5	meche	Lebanese Arabic	5	4	0
wash [clothes]	2	3.45238	ghassal	Lebanese Arabic	7	4	0
watch [TV]	2	3.2381	hodir television	Lebanese Arabic	15	12	1
water	2	4.42857	se'e	Lebanese Arabic	4	4	0
wave	2	4.80952	mawje	Lebanese Arabic	6	4	0
weigh	2	5.42857	zei:n	Lebanese Arabic	4	4	0
whisper	2	4.14286	wachwach	Lebanese Arabic	7	5	0
whistle	2	4.38095	soufayra	Lebanese Arabic	7	5	0
wink	2	5	ghamaz	Lebanese Arabic	6	4	0
write	2	3.66667	katab	Lebanese Arabic	6	4	0
airplane	1	4.05405	kapal terbang	Malay	11	12	1	362
ant	1	4.09459	semut	Malay	5	5	0	2903
apple	1	4.43243	epal	Malay	4	4	0	1168
axe	1	5.35135	kapak	Malay	5	5	0	1181
ball	1	3.83784	bola	Malay	4	4	0	18806
balloon	1	4.06757	belon	Malay	5	5	0	605
banana	1	3.97297	pisang	Malay	5	6	0	6605
barrel	1	5.56757	tong	Malay	3	4	0	3793
basket	1	4.68919	bakul	Malay	5	5	0	1170
battery	1	6.02703	bateri	Malay	6	6	0	1419
bear	1	5.25676	beruang	Malay	6	7	0	1192
bed	1	6.81081	katil	Malay	5	5	0	4192
bell	1	5.21622	loceng	Malay	5	6	0	808
belt	1	5.91892	tali pinggang	Malay	10	12	1	1248
bicycle	1	4.54054	basikal	Malay	7	7	0	2501
bird	1	3.87838	burung	Malay	5	6	0	18114
blackboard	1	5.7027	papan hitam	Malay	10	10	1	167
bone	1	5.59459	tulang	Malay	5	6	0	16132
boot	1	6.62162	but	Malay	3	3	0	21
bottle	1	4	botol	Malay	5	5	0	5939
broom	1	4.91892	penyapu	Malay	6	7	0	725
brush	1	4.43243	sikat	Malay	5	5	0	784
bus	1	4.16216	bas	Malay	3	3	0	10137
butterfly	1	4.62162	rama-rama	Malay	8	9	0	527
button	1	4.86486	butang	Malay	5	6	0	1608
candle	1	5.13514	lilin	Malay	5	5	0	2582
cap	1	4.54054	topi	Malay	4	4	0	2211
car	1	3.86486	kereta	Malay	6	6	0	38419
carrot	1	5.72973	lobak merah	Malay	10	10	1	213
cat	1	3.64865	kucing	Malay	5	6	0	7663
chain	1	5.27027	rantai	Malay	5	6	0	4269
chair	1	4.47297	kerusi	Malay	6	6	0	14089
clock	1	5.56757	jam	Malay	3	3	0	69249
cloud	1	4.56757	awan	Malay	4	4	0	5740
comb	1	4.43243	sikat	Malay	5	5	0	784
computer	1	6.81081	komputer	Malay	7	8	0	29223
cow	1	4.12162	lembu	Malay	5	5	0	7841
crocodile	1	4.48649	buaya	Malay	5	5	0	3503
cucumber	1	5.35135	timun	Malay	5	5	0	884
desk	1	4.14865	meja	Malay	4	4	0	13388
dog	1	4.5	anjing	Malay	5	6	0	9595
doll	1	4.32432	anak patung	Malay	10	10	1	195
door	1	4.08108	pintu	Malay	5	5	0	32378
dress	1	4.89189	gaun	Malay	4	4	0	1007
drum	1	5.05405	dram	Malay	4	4	0	231
duck	1	6.64865	itik	Malay	4	4	0	1713
dummy	1	4.64865	puting	Malay	5	6	0	2609
ear	1	3.77027	telinga	Malay	6	7	0	11491
elephant	1	4.55405	gajah	Malay	5	5	0	7925
envelope	1	6.48649	sampul surat	Malay	11	11	1	407
eye	1	3.59459	mata	Malay	4	4	0	95248
feather	1	5.05405	bulu	Malay	4	4	0	6507
fish	1	4.14865	ikan	Malay	5	4	0	32594
flag	1	5.67568	bendera	Malay	7	7	0	8276
flower	1	4.05405	bunga	Malay	4	5	0	22792
fly	1	4.78378	lalat	Malay	5	5	0	2423
fork	1	6.48649	garfu	Malay	5	5	0	128
frog	1	4.14865	katak	Malay	5	5	0	3029
gate	1	5	pagar	Malay	5	5	0	5509
giraffe	1	5.08108	zirafah	Malay	7	7	0	67
glass	1	5.21622	gelas	Malay	5	5	0	4612
glasses	1	7.35135	cermin mata	Malay	10	10	1	557
goat	1	6.54054	kambing	Malay	6	7	0	11490
guitar	1	4.67568	gitar	Malay	5	5	0	2647
gun	1	6.08108	pistol	Malay	6	6	0	1769
hat	1	4.54054	topi	Malay	4	4	0	2211
heart	1	5.91892	hati	Malay	4	4	0	143570
helicopter	1	3.41892	helikopter	Malay	10	10	0	3033
Hen	1	3.83784	ayam	Malay	4	4	0	19649
horse	1	4.55405	kuda	Malay	4	4	0	8831
house	1	3.86486	rumah	Malay	5	5	0	165012
iron	1	6.89189	sterika	Malay	8	7	0	42
kangaroo	1	5.72973	kanggaru	Malay	7	8	0	61
key	1	5.13514	kunci	Malay	5	5	0	12169
knife	1	5.04054	pisau	Malay	4	5	0	4426
ladder	1	4.54054	tangga	Malay	5	6	0	19712
lamp	1	4.62162	lampu	Malay	5	5	0	11845
leaf	1	7.21622	daun	Malay	4	4	0	15980
leg	1	4.27027	kaki	Malay	4	4	0	44859
lemon	1	6.7027	lemon	Malay	5	5	0	741
lighter	1	7.05405	pemetik api	Malay	10	10	1	68
lion	1	4.60811	singa	Malay	4	5	0	2767
lipstick	1	6.94595	gincu	Malay	5	5	0	357
match	1	5.67568	mancis	Malay	6	6	0	207
monkey	1	4.13514	monyet	Malay	5	6	0	2497
moon	1	4.54054	bulan	Malay	5	5	0	117417
motorbike	1	5.24324	motosikal	Malay	9	9	0	3304
mouse	1	4.51351	tikus	Malay	5	5	0	3884
mushroom	1	5.7027	cendawan	Malay	8	8	0	2883
needle	1	3.5	jarum	Malay	5	5	0	4007
nest	1	5.59459	sarang	Malay	5	6	0	3597
newspaper	1	5.64865	suratkhabar	Malay	10	11	1	916
nose	1	3.48649	hidung	Malay	5	6	0	7498
onion	1	5.51351	bawang	Malay	5	6	0	4546
orange	1	4.24324	oren	Malay	4	4	0	985
owl	1	6.02703	burung hantu	Malay	10	11	1	488
paintbrush	1	5.10811	berus	Malay	5	5	0	785
pear	1	6.62162	pear	Malay	3	4	0	127
pen	1	4.51351	pen	Malay	3	3	0	2752
pencil	1	4.60811	pensel	Malay	6	6	0	435
penguin	1	6.67568	penguin	Malay	6	7	0	522
pineapple	1	5.12162	nenas	Malay	5	5	0	484
pizza	1	7.75676	piza	Malay	4	4	0	85
postman	1	5.93243	posmen	Malay	6	6	0	244
rabbit	1	4.66216	arnab	Malay	5	5	0	1036
racket	1	6.2973	raket	Malay	5	5	0	396
rainbow	1	5.33784	pelangi	Malay	6	7	0	2467
roof	1	5.7027	bumbung	Malay	6	7	0	2051
ruler	1	4.97297	pembaris	Malay	8	8	0	152
sandwich	1	6.2973	sandwic	Malay	6	7	0	59
saw	1	6.40541	gergaji	Malay	7	7	0	1181
scale	1	7.13514	penimbang	Malay	8	9	0	150
scarf	1	8.35135	selendang	Malay	8	9	0	861
scissors	1	6.89189	menggunting	Malay	6	7	0	1631
shirt	1	6.94595	kemeja	Malay	6	6	0	1222
shoe	1	4.31081	kasut	Malay	5	5	0	4370
slide	1	6.31081	gelongsor	Malay	8	9	0	69
snail	1	4.33784	siput	Malay	5	5	0	1297
snake	1	4.48649	ular	Malay	4	4	0	6077
snowman	1	7	orang salji	Malay	10	10	1
sock	1	5.14865	stoking	Malay	7	7	0	130
sofa	1	5.62162	sofa	Malay	4	4	0	2342
spoon	1	4.14865	sudu	Malay	4	4	0	2083
squirrel	1	4.82432	tupai	Malay	4	5	0	546
stairs	1	4.54054	tangga	Malay	5	6	0	19712
star	1	4.62162	bintang	Malay	6	7	0	16561
stool	1	4.47297	kerusi	Malay	6	6	0	14089
strawberry	1	5.63514	strawberi	Malay	8	9	0	231
sun	1	4.2027	matahari	Malay	8	8	0	22732
sunglasses	1	7.35135	cermin mata	Malay	9	10	1	557
sweater	1	6.64865	baju sejuk	Malay	9	9	1	63
swing	1	5.25676	buaian	Malay	5	6	0	645
tail	1	4.32432	ekor	Malay	4	4	0	9937
tank	1	6.2973	kereta kebal	Malay	11	11	1	1669
telephone	1	5.56757	telefon	Malay	7	7	0	13807
television	1	5.02703	televisyen	Malay	9	10	0	5621
tennis ball	1	7.27027	bolatenis	Malay	9	9	0	78
thermometer	1	9.16216	termometer	Malay	9	10	0	352
tie	1	7.08108	tali leher	Malay	9	9	1	328
tiger	1	5.37838	harimau	Malay	6	7	0	4796
tomato	1	4.95946	tomato	Malay	6	6	0	891
toothbrush	1	4.43243	berus gigi	Malay	9	9	1	286
tractor	1	6.83784	traktor	Malay	7	7	0	325
tree	1	3.78378	pokok	Malay	5	5	0	27873
trousers	1	4.05405	seluar	Malay	6	6	0	4299
truck	1	4.63514	lori	Malay	4	4	0	2415
turtle	1	4.94595	kura-kura	Malay	8	9	0	1202
umbrella	1	4.81081	payung	Malay	5	6	0	3288
vest	1	4.62162	jaket	Malay	5	5	0	1221
wardrobe	1	5.35135	almari	Malay	6	6	0	1184
watch	1	5.35135	jam tangan	Malay	8	9	1	953
watermelon	1	4.7027	tembikai	Malay	7	8	0	603
wave	1	6.02703	ombak	Malay	5	5	0	3766
whistle	1	6.37838	wisel	Malay	5	5	0	274
zebra	1	6.13514	kuda belang	Malay	9	10	1	35
bark	2	6.83784	menyalak	Malay	7	8	0	608
bath	2	3.63514	mandi	Malay	5	5	0	14725
beg	2	7.51351	meminta sedekah	Malay	7	7	0	174
bite	2	4	gigit	Malay	5	5	0	872
blow	2	4.7027	tiup	Malay	4	4	0	562
boil	2	7.24324	didih	Malay	5	5	0	232
box	2	8.13514	bertinju	Malay	7	8	0	68
brush [teeth]	2	4.18919	gosok gigi	Malay	9	9	1	243
build	2	5.43243	bina	Malay	4	4	0	6278
burn	2	5.21622	bakar	Malay	5	5	0	21981
burst	2	6.21622	meletup	Malay	7	7	0	1364
carry	2	4.45946	angkat	Malay	5	6	0	7819
carve	2	7.37838	ukir	Malay	4	4	0	599
clap	2	3.97297	tepuk tangan	Malay	10	11	1	563
clean	2	4.43243	lap	Malay	3	3	0	1370
climb	2	4.81081	panjat	Malay	6	6	0	750
comb	2	4.45946	sikat	Malay	5	5	0	784
conduct	2	8.78378	mengetuai	Malay	8	9	0	2252
cook	2	5.89189	memasak	Malay	7	7	0	4569
crawl	2	5.59459	merangkak	Malay	8	9	0	1690
cry	2	4.82432	menangis	Malay	7	8	0	16757
cut	2	6.47297	menggunting	Malay	8	11	0	1631
dance	2	5.83784	menari	Malay	6	6	0	3040
dig	2	5.86486	gali	Malay	4	4	0	828
dive	2	5.7027	berenang	Malay	7	8	0	3060
drag	2	4.51351	tarik	Malay	5	5	0	7333
draw	2	4.37838	lukis	Malay	5	5	0	1792
drill	2	8.27027	menggerudi	Malay	8	10	0	70
drink	2	3.51351	minum	Malay	5	5	0	23421
drip	2	7.62162	menitik	Malay	7	7	0	776
drive	2	6.75676	memandu	Malay	7	7	0	5524
drown	2	6.02703	lemas	Malay	5	5	0	2583
dry	2	7.21622	mengering	Malay	7	9	0	565
eat	2	3.2973	makan	Malay	5	5	0	79258
erupt	2	8.45946	meletus	Malay	7	7	0	1468
extinguish	2	4.82432	padam	Malay	5	5	0	2070
fall	2	4.16216	jatuh	Malay	5	5	0	27280
feed	2	5.27027	beri makan	Malay	9	9	1	250
fight	2	5.18919	gaduh	Malay	5	5	0	1149
file	2	7.27027	mengasah	Malay	7	8	0	1149
fish	2	6.81081	memancing	Malay	5	4	0	3968
fly	2	4.48649	terbang	Malay	5	5	0	15685
fry	2	4.59459	masak	Malay	5	5	0	9044
glue	2	5.24324	tampal	Malay	6	6	0	430
grate	2	8.02703	memarut	Malay	7	7	0	18
grill	2	7.05405	panggang	Malay	6	8	0	902
hammer	2	7.45946	memaku	Malay	6	6	0	122
hatch	2	6.7027	menetas	Malay	7	7	0	596
hitchhike	2	6.75676	menahan	Malay	7	7	0	14985
hug	2	3.97297	peluk	Malay	5	5	0	1424
hunt	2	6.83784	buru	Malay	4	4	0	945
iron	2	4.89189	gosok	Malay	8	7	0	873
jump	2	4	lompat	Malay	6	6	0	2543
kick	2	4.44595	sepak	Malay	5	5	0	6918
kiss	2	3.95946	cium	Malay	4	4	0	1747
knit	2	7.64865	mengait	Malay	6	7	0	212
knock	2	4.67568	ketuk	Malay	5	5	0	680
laugh	2	4.91892	ketawa	Malay	6	6	0	7471
lick	2	4.81081	jilat	Malay	5	5	0	935
light	2	6.97297	memetik	Malay	7	7	0	3201
listen	2	4.05405	dengar	Malay	6	6	0	18362
marry	2	6.72973	kahwin	Malay	5	6	0	8994
massage	2	6	urut	Malay	4	4	0	2559
measure	2	5.83784	ukur	Malay	4	4	0	3448
melt	2	5.48649	cair	Malay	4	4	0	3509
milk	2	6.35135	perah	Malay	5	5	0	609
mix	2	5.02703	kacau	Malay	4	5	0	3835
mop	2	7.21622	mengemop	Malay	7	8	0	17
open	2	4.08108	buka	Malay	4	4	0	12182
operate	2	7.45946	bedah	Malay	5	5	0	3918
paint	2	4.37838	lukis	Malay	5	5	0	1792
peel	2	6.67568	kupas	Malay	5	5	0	527
photograph	2	5.94595	ambil gambar	Malay	11	11	1	488
pick	2	5.86486	petik	Malay	5	5	0	1528
pinch	2	4.32432	cubit	Malay	5	5	0	278
plant	2	4.86486	tanam	Malay	5	5	0	4265
play [the piano]	2	7.13514	main piano	Malay	11	9	1	48
play golf	2	7.51351	main golf	Malay	8	8	1	138
plow	2	8.16216	bajak	Malay	5	5	0	829
post	2	8	mengepos surat	Malay	12	13	1	7
pour	2	5.13514	tuang	Malay	4	5	0	496
pull	2	4.51351	tarik	Malay	5	5	0	7333
push	2	4.17568	tolak	Malay	5	5	0	7138
rain	2	3.81081	hujan	Malay	5	5	0	21952
rake	2	5.89189	menyapu	Malay	6	7	0	2180
read	2	4.24324	baca	Malay	4	4	0	41870
ride [a horse]	2	6.89189	tunggang	Malay	6	8	0	479
ring	2	4.62162	tekan	Malay	5	5	0	3294
roast	2	7.05405	panggang	Malay	6	8	0	902
row	2	7.56757	dayung	Malay	5	6	0	304
run	2	3.91892	lari	Malay	4	4	0	13681
sail	2	7.56757	belayar	Malay	7	7	0	1050
saw	2	8.05405	menggergaji	Malay	7	7	0	76
search	2	4.24324	cari	Malay	4	4	0	19702
sew	2	5.83784	jahit	Malay	5	5	0	1234
sharpen	2	6.89189	asah	Malay	4	4	0	330
shave	2	6.59459	cukur	Malay	5	5	0	711
shear	2	6.59459	cukur	Malay	5	5	0	711
shower	2	3.63514	mandi	Malay	5	5	0	14725
sing	2	4.62162	nyanyi	Malay	5	6	0	1401
sink	2	6.21622	tenggelam	Malay	7	9	0	5427
sit	2	3.48649	duduk	Malay	5	5	0	41076
skate	2	7.21622	luncur	Malay	6	6	0	170
ski	2	7.75676	meluncur	Malay	8	8	0	1773
sleep	2	3.25676	tidur	Malay	5	5	0	37988
slide	2	5.75676	gelongsor	Malay	8	9	0	69
slip	2	6.67568	gelincir	Malay	8	8	0	79
smell	2	5.32432	hidu	Malay	4	4	0	244
snow	2	7.67568	bersalji	Malay	5	5	0	802
spill	2	4.72973	tumpah	Malay	6	6	0	1837
spin	2	5.83784	jahit	Malay	5	5	0	1234
squeeze	2	6.35135	perah	Malay	5	5	0	609
steal	2	5.21622	curi	Malay	4	4	0	1808
sting	2	6.37838	sengat	Malay	6	6	0	280
stir	2	5.02703	kacau	Malay	4	5	0	3835
surf	2	7.21622	luncur	Malay	6	6	0	170
sweat	2	6.21622	berpeluh	Malay	7	8	0	1060
sweep	2	4.72973	sapu	Malay	6	7	0	2254
swim	2	6.02703	renang	Malay	7	8	0	3060
swing	2	3.71622	main	Malay	5	6	0	17680
talk [on the phone]	2	4.97297	bercakap	Malay	7	8	0	18070
tear	2	5.10811	koyak	Malay	5	5	0	708
throw	2	4.51351	buang	Malay	5	5	0	9931
tie	2	4.83784	ikat	Malay	9	9	1	1978
type	2	7.35135	taip	Malay	4	4	0	1122
vacuum	2	7.38889	vakum	Malay	5	5	0	662
wake up	2	3.77027	bangun	Malay	5	6	0	17816
walk	2	4.97297	berjalan	Malay	7	8	0	38215
wash [clothes]	2	4.59459	basuh	Malay	5	5	0	1819
watch [TV]	2	6.14865	tonton	Malay	6	6	0	1651
water	2	4.7027	siram	Malay	5	5	0	372
wave	2	4.87838	lambai	Malay	5	5	0	74
weigh	2	6.45946	timbang	Malay	6	7	0	820
whisper	2	5.62162	bisik	Malay	5	5	0	1645
whistle	2	4.7027	tiup	Malay	5	5	0	562
wink	2	6.40541	kenyit	Malay	5	6	0	33
write	2	4.24324	tulis	Malay	5	5	0	15279
airplane	1	3.90476	هواپیما	Persian	9	7	1	629
ant	1	3.14286	مورچه	Persian	5	5	0	17
apple	1	2.61905	سیب	Persian	3	3	0	153
axe	1	5.47619	تبر	Persian	5	3	0	13
ball	1	2.30952	توپ	Persian	3	3	0	318
balloon	1	2.90476	بادکنک	Persian	8	5	1	17
banana	1	3.33333	موز	Persian	3	3	0	33
barrel	1	5.52381	بشکه	Persian	5	4	0	485
basket	1	4.04762	سبد	Persian	5	3	0
battery	1	4.57143	باتری	Persian	5	5	0
bear	1	3.47619	خرس	Persian	4	3	0	37
bed	1	3.28571	تخت خواب	Persian	8	7	1	35
bell	1	3.47619	زنگ	Persian	4	3	0	6
belt	1	4.14286	کمربند	Persian	9	6	1	88
bicycle	1	3.47619	دوچرخه	Persian	7	6	1	104
bird	1	3.04762	پرنده	Persian	7	5	0	17
blackboard	1	5.38095	تخته سیاه	Persian	9	8	1
bone	1	4.09524	استخوان	Persian	8	7	0
boot	1	4.7619	چکمه	Persian	5	4	0	15
bottle	1	5.14286	بطری	Persian	5	4	0	66
broom	1	3.33333	جارو	Persian	4	4	0	35
brush	1	4.66667	بُرُس	Persian	5	3	0
bus	1	4.47619	اتوبوس	Persian	7	6	0	418
butterfly	1	3.7619	پروانه	Persian	7	6	0	324
button	1	3.38095	دکمه	Persian	5	4	0	38
candle	1	3.66667	شمع	Persian	3	3	0	98
car	1	2.95238	ماشین	Persian	5	5	0	537
carrot	1	3.28571	هویج	Persian	5	4	0	37
cat	1	2.85714	گربه	Persian	5	4	0	82
chain	1	4.61905	زنجیر	Persian	6	5	0	73
chair	1	3.33333	صندلی	Persian	7	5	0	282
cheese	1	3.04762	پنیر	Persian	5	4	0
clock	1	3.61905	ساعت	Persian	5	4	0
cloud	1	3.66667	ابر	Persian	4	3	0	206
comb	1	3.04762	شانه	Persian	4	4	0	110
computer	1	7.66667	کامپیوتر	Persian	10	8	0
cow	1	2.95238	گاو	Persian	3	3	0	185
crocodile	1	5.38095	تمساح	Persian	6	5	0
cucumber	1	2.95238	خیار	Persian	5	4	0
desk	1	6	میز تحریر	Persian	9	8	1
dog	1	3.28571	سگ	Persian	3	2	0	177
doll	1	2.85714	عروسک	Persian	7	5	0	43
door	1	2.42857	در	Persian	3	2	0	951
dress	1	3.7619	پیراهن	Persian	7	6	0
drum	1	4.85714	طبل	Persian	4	3	0	44
duck	1	3.52381	اردک	Persian	6	4	0	18
dummy	1	2.7619	پستانک	Persian	8	6	0
ear	1	2.2381	گوش	Persian	3	3	0	978
elephant	1	3.71429	فیل	Persian	3	3	0
envelope	1	5.61905	پاکت نامه	Persian	9	8	1	119
eye	1	2.2381	چشم	Persian	4	3	0	2237
feather	1	3.47619	پر	Persian	3	2	0
fish	1	2.80952	ماهی	Persian	4	4	0	541
flag	1	5	پرچم	Persian	6	4	0	295
flower	1	2.66667	گل	Persian	3	2	0	1562
fly	1	3.66667	مگس	Persian	5	3	0	53
fork	1	3.2381	چنگال	Persian	6	5	0	51
frog	1	3.66667	قورباغه	Persian	7	7	0	38
frying pan	1	4.85714	ماهی تابه	Persian	8	8	1	10
gate	1	2.42857	در	Persian	3	2	0
giraffe	1	4.57143	زرافه	Persian	7	5	0	3
glass	1	2.7619	لیوان	Persian	5	5	0	101
glasses	1	3.61905	عینک	Persian	6	4	0
goat	1	3.71429	بز	Persian	3	2	0	64
guitar	1	7.66667	گیتار	Persian	5	5	0	28
gun	1	4.09524	تفنگ	Persian	6	4	0	90
hat	1	2.95238	کلاه	Persian	5	4	0
heart	1	4.71429	قلب	Persian	4	3	0	923
helicopter	1	5.09524	هلیکوپتر	Persian	10	8	0	135
Hen	1	3.2381	مرغ	Persian	4	3	0
horse	1	3.38095	اسب	Persian	4	3	0	269
house	1	2.57143	خانه	Persian	4	4	0	3102
iron	1	4.09524	اتو	Persian	4	3	0	18
kangaroo	1	5.66667	کانگورو	Persian	7	7	0	1
key	1	4.14286	کلید	Persian	5	4	0	316
knife	1	3.42857	چاقو	Persian	4	4	0	130
ladder	1	4.38095	نردبان	Persian	8	6	0	26
lamp	1	7	آباژور	Persian	7	6	0	43
leaf	1	3.33333	برگ	Persian	4	3	0	571
leg	1	2.19048	پا	Persian	2	2	0
lemon	1	3.71429	لیمو	Persian	4	4	0	29
lighter	1	5.57143	فندک	Persian	6	4	0
lion	1	2.85714	شیر	Persian	3	3	0	790
lipstick	1	5.85714	رژ لب	Persian	7	4	1
match	1	4.04762	کبریت	Persian	6	5	0
monkey	1	3.80952	میمون	Persian	6	5	0	55
moon	1	3.09524	ماه	Persian	3	3	0	6264
motorbike	1	5	موتورسیکلت	Persian	11	10	0
mouse	1	3.42857	موش	Persian	3	3	0	77
mushroom	1	5.95238	قارچ	Persian	4	4	0	49
needle	1	3.80952	سوزن	Persian	5	4	0	51
nest	1	4.61905	لانه پرنده	Persian	13	9	1
newspaper	1	5.19048	روزنامه	Persian	7	7	1
nose	1	3.14286	بینی	Persian	4	4	0	159
onion	1	3.61905	پیاز	Persian	5	4	0	167
orange	1	3.28571	پرتقال	Persian	8	6	0	45
owl	1	4.90476	جغد	Persian	4	3	0	17
paintbrush	1	5.80952	قلمو	Persian	6	4	1
pear	1	3.66667	گلابی	Persian	6	5	0	34
pen	1	4.66667	خودکار	Persian	6	6	0	168
pencil	1	3.09524	مداد	Persian	5	4	0	32
penguin	1	5.38095	پنگوئن	Persian	8	6	0	10
pineapple	1	6.09524	آناناس	Persian	7	6	0	24
pizza	1	6	پیتزا	Persian	5	5	0
rabbit	1	3.28571	خرگوش	Persian	6	5	1	42
racket	1	6.19048	راکت	Persian	5	4	0
rainbow	1	4.95238	رنگین کمان	Persian	11	9	1
roof	1	4.52381	سقف	Persian	4	3	0
ruler	1	4.71429	خط کش	Persian	6	4	1	3
sandwich	1	4.52381	ساندویچ	Persian	8	7	0
saw	1	5.04762	اره	Persian	5	3	0	15
scale	1	4.80952	ترازو	Persian	6	5	0
scarf	1	4.14286	شال گردن	Persian	9	7	1
scissors	1	3.52381	قیچی	Persian	5	4	0	25
sewing machine	1	4.85714	چرخ خیاطی	Persian	11	8	1
shirt	1	3.7619	پیراهن	Persian	7	6	0	104
shoe	1	2.80952	کفش	Persian	4	3	0	146
slide	1	2.71429	سرسره	Persian	7	5	1
snail	1	4.75	حلزون	Persian	7	5	0	9
snake	1	3.71429	مار	Persian	3	3	0	78
snowman	1	3.7619	آدم برفی	Persian	10	7	1	1
sock	1	2.80952	جوراب	Persian	5	5	0	20
sofa	1	4.09524	مبل	Persian	4	3	0
spoon	1	2.38095	قاشق	Persian	5	4	0	79
squirrel	1	5.04762	سنجاب	Persian	6	5	0	3
stairs	1	3.57143	پله	Persian	5	3	0
star	1	3.61905	ستاره	Persian	6	5	0	317
stool	1	4.52381	چهارپایه	Persian	9	8	1	13
strawberry	1	4.2381	توت فرنگی	Persian	10	8	1	10
sun	1	3.38095	خورشید	Persian	6	6	0
sunglasses	1	5.57143	عینک دودی	Persian	10	8	1
sweater	1	6.42857	پلیور	Persian	7	5	0	6
swing	1	2.47619	تاب	Persian	3	3	0	110
tail	1	3.80952	دم	Persian	3	2	0
tank	1	5.47619	تانک	Persian	4	4	0
telephone	1	3.90476	تلفن	Persian	7	4	0	1523
tennis ball	1	2.30952	توپ	Persian	3	3	0
thermometer	1	5.85	دماسنج	Persian	8	6	1
tie	1	6.42857	کراوات	Persian	7	6	0	5
tiger	1	4.2381	ببر	Persian	4	3	0	57
tomato	1	3.66667	گوجه فرنگی	Persian	11	9	1	103
toothbrush	1	3.57143	مسواك	Persian	6	5	0	22
tractor	1	5.7619	تراکتور	Persian	8	7	0
tree	1	3.14286	درخت	Persian	6	4	0	429
trousers	1	2.80952	شلوار	Persian	6	5	0
truck	1	4.09524	کامیون	Persian	7	6	0	244
turtle	1	3.7619	لاک پشت	Persian	7	6	1	15
umbrella	1	3.95238	چتر	Persian	4	3	0	98
vest	1	5.38095	جلیقه	Persian	6	5	0	11
wardrobe	1	3.47619	كمد	Persian	5	3	0
watch	1	5.28571	ساعت مچی	Persian	9	7	1	3491
watermelon	1	3.33333	هندوانه	Persian	9	7	0	26
wave	1	5.38095	موج	Persian	3	3	0
whistle	1	4.19048	سوت	Persian	3	3	0	37
bark	2	5.38095	پارس کردن	Persian	10	9	1
bath	2	3.52381	حمام کردن	Persian	12	9	1
beg	2	6.19048	گدایی کردن	Persian	12	9	1
bite	2	3.71429	گاز گرفتن	Persian	9	8	1
blow	2	4.2381	فوت کردن	Persian	9	7	1
boil	2	5.61905	جوشیدن	Persian	6	6	0
box	2	7.15	بوکس بازی کردن	Persian	14	12	1
brush [teeth]	2	3.7619	مسواک زدن	Persian	12	10	1
build	2	6.28571	بنایی کردن	Persian	13	10	1
burn	2	3.4	سوختن	Persian	6	6	0
burst	2	4.47619	ترکیدن	Persian	8	6	0
carry	2	6.85714	حمل کردن	Persian	10	8	1
carve	2	7.61905	مجسمه سازی	Persian	19	14	1
clap	2	2.95	دست زدن	Persian	10	8	1
clean	2	4.09524	تمیز کردن	Persian	11	9	1
climb	2	3.80952	بالا رفتن	Persian	8	8	1
comb	2	3.6	شانه زدن	Persian	10	9	1
conduct	2	11.1905	رهبری ارکستر	Persian	22	16	1
cook	2	4.61905	غذا پختن	Persian	10	8	1
crawl	2	4.38095	چهار دست و پا رفتن	Persian	16	14	1
cry	2	3	گریه کردن	Persian	11	10	1
cut	2	4.33333	بریدن	Persian	6	5	0
dance	2	4	رقصیدن	Persian	7	6	0
dig	2	5.47619	بیل زدن	Persian	9	8	1
dive	2	6.4	شیرجه زدن	Persian	11	10	1
drag	2	4.11905	کشیدن	Persian	6	5	0
draw	2	3.2381	نقاشی کشیدن	Persian	13	10	1
drill	2	5.19048	سوراخ کردن	Persian	11	10	1
drink	2	5.3	نوشیدن	Persian	8	6	0
drip	2	5.47619	چکه کردن	Persian	11	8	1
drive	2	5.14286	رانندگی کردن	Persian	15	12	1
drown	2	5.83333	غرق شدن	Persian	8	7	1
dry	2	5.85714	سشوار کشیدن	Persian	10	10	1
eat	2	2.66667	خوردن	Persian	6	6	0
erupt	2	7.57571	فوران کردن	Persian	13	10	1
extinguish	2	3.7619	خاموش کردن	Persian	11	10	1
fall	2	3.04762	افتادن	Persian	7	5	0
feed	2	4.19048	غذا دادن	Persian	8	7	1
fight	2	4.14286	دعوا کردن	Persian	10	9	1
file	2	7.57143	سوهان زدن	Persian	11	10	1
fish	2	5.19048	ماهیگیری کردن	Persian	14	13	1
fly	2	4.2381	پرواز کردن	Persian	12	10	1
fry	2	4.71429	آشپزی کردن	Persian	13	10	1
glue	2	4.2381	چسباندن	Persian	9	8	0
grate	2	5.2	رنده کردن	Persian	11	9	1
grill	2	5.07143	کباب کردن	Persian	11	9	1
hammer	2	4.95238	کوبیدن	Persian	6	6	0
hatch	2	5.47619	از تخم درآمدن	Persian	14	11	1
hug	2	3.19048	بغل کردن	Persian	10	8	1
hunt	2	6	شکار کردن	Persian	11	9	1
iron	2	4.38095	اتو کردن	Persian	10	8	1
kick	2	4.7619	شوت زدن	Persian	9	8	1
kiss	2	2.90476	بوسیدن	Persian	6	6	0
knit	2	5.33333	بافتن	Persian	6	6	0
knock	2	3.90476	در زدن	Persian	9	7	1
laugh	2	2.80952	خندیدن	Persian	7	5	0
lick	2	3.90476	لیس زدن	Persian	9	8	1
light	2	3.80952	روشن کردن	Persian	11	9	1
listen	2	3.66667	گوش کردن	Persian	9	8	1
marry	2	6.52381	ازدواج کردن	Persian	14	11	1
massage	2	6.33333	ماساژ دادن	Persian	9	9	1
measure	2	6.2381	اندازه گرفتن	Persian	13	12	1
melt	2	4.42857	آب شدن	Persian	7	6	1
milk	2	5.85714	شیر دوشیدن	Persian	9	9	1
mix	2	4.66667	هم زدن	Persian	9	7	1
mop	2	6.61905	تی کشیدن	Persian	9	7	1
open	2	3.47619	باز کردن	Persian	9	8	1
operate	2	7.42857	جراحی کردن	Persian	13	10	1
paint	2	3.28571	نقاشی کردن	Persian	13	10	1
pee	2	2.47619	جیش کردن	Persian	9	8	1
peel	2	4.42857	پوست کندن	Persian	10	9	1
photograph	2	4.90476	عکس گرفتن	Persian	10	9	1
pick	2	4.71429	چیدن	Persian	6	6	0
pinch	2	4.95238	نیشگون گرفتن	Persian	12	12	1
plant	2	4.55	کاشتن	Persian	6	6	0
play [the piano]	2	7.19048	پیانو زدن	Persian	12	10	1
play golf	2	10.7143	گلف بازی کردن	Persian	14	12	1
plow	2	6.57143	شخم زدن	Persian	10	8	1
post	2	6.52381	پست کردن	Persian	10	8	1
pour	2	3.40476	ریختن	Persian	6	6	0
pull	2	4.11905	کشیدن	Persian	6	5	0
push	2	4.38095	هل دادن	Persian	7	6	1
rain	2	4.14286	باریدن	Persian	6	6	0
rake	2	3.98413	جارو کردن	Persian	10	9	1
read	2	4.14286	خواندن	Persian	6	6	0
ride [a horse]	2	5.47619	اسب سواری کردن	Persian	16	13	1
ring	2	4.33333	زنگ زدن	Persian	10	8	1
roast	2	5.07143	کباب کردن	Persian	11	9	1
row	2	5.57143	پارو زدن	Persian	10	9	1
run	2	3.1	دویدن	Persian	6	5	0
sail	2	5.66667	قایق سواری کردن	Persian	17	14	1
saw	2	5.6	اره کردن	Persian	11	8	1
search	2	4.19048	دنبال چیزی گشتن	Persian	18	15	1
sew	2	5.33333	خیاطی کردن	Persian	13	10	1
sharpen	2	5.80952	تیز کردن	Persian	9	8	1
shave	2	7.61905	اصلاح کردن	Persian	12	10	1
shear	2	8.09524	پشم زدن	Persian	10	8	1
shower	2	5.57143	دوش گرفتن	Persian	9	9	1
sing	2	4.90476	آواز خواندن	Persian	11	10	1
sink	2	5.83333	غرق شدن	Persian	8	7	1
sit	2	2.85714	نشستن	Persian	6	6	0
skate	2	8	اسکیت کردن	Persian	13	10	1
ski	2	7.66667	اسکی کردن	Persian	11	9	1
sleep	2	2.6	خوابیدن	Persian	6	7	0
slide	2	3.42857	سرسره بازی کردن	Persian	17	14	1
slip	2	4	لیز خوردن	Persian	9	9	1
smell	2	3.61905	بو کردن	Persian	8	7	1
snow	2	3.95238	برف باریدن	Persian	10	9	1
spill	2	3.40476	ریختن	Persian	6	6	0
spin	2	8.90476	ریسیدن	Persian	6	6	0
squeeze	2	5.90476	فشردن	Persian	9	8	0
steal	2	5.35	دزدیدن	Persian	7	6	0
sting	2	4.28571	نیش زدن	Persian	9	8	1
stir	2	4.66667	هم زدن	Persian	9	7	1
stroke	2	4.52381	نوازش کردن	Persian	13	10	1
sunbath	2	8.14286	آفتاب گرفتن	Persian	12	11	1
surf	2	9.52381	موج سواری کردن	Persian	15	13	1
sweep	2	3.98413	جارو کردن	Persian	10	9	1
swim	2	4.66667	شنا کردن	Persian	10	8	1
swing	2	3.42857	تاب خوردن	Persian	9	9	1
talk [on the phone]	2	4.33333	صحبت کردن	Persian	12	9	1
tear	2	4	پاره کردن	Persian	10	9	1
throw	2	4.95238	دور انداختن	Persian	10	10	1
tie	2	4.66667	بستن بند کفش	Persian	15	12	1
type	2	9.38095	تایپ کردن	Persian	10	9	1
vacuum	2	3.98413	جارو کردن	Persian	10	9	1
wake up	2	3.42857	بیدار شدن	Persian	9	9	1
walk	2	3	راه رفتن	Persian	7	7	1
wash [clothes]	2	4.19048	لباس شستن	Persian	11	10	1
watch [TV]	2	4.57143	تماشا کردن	Persian	12	10	1
water	2	3.80952	آب دادن	Persian	7	6	1
wave	2	4.2381	دست تکان دادن	Persian	13	11	1
weigh	2	6.19048	وزن کردن	Persian	10	8	1
whisper	2	5.2381	در گوشی حرف زدن	Persian	18	14	1
whistle	2	4.09524	سوت زدن	Persian	9	8	1
wink	2	4.19048	چشمک زدن	Persian	12	9	1
write	2	4.09524	نوشتن	Persian	8	7	0
airplane	1	2.58333	Օդանաւ	Western Armenian	6	6	1
ant	1	3.25	Մրջիւն	Western Armenian	6	6	1
apple	1	2.16667	Խնձոր	Western Armenian	6	5	1
ball	1	1.41667	Գնդակ	Western Armenian	6	5	1
balloon	1	2.33333	Փուչիկ	Western Armenian	5	6	1
banana	1	1.91667	Պանան	Western Armenian	5	5	1
basket	1	4.58333	Սակառ	Western Armenian	5	5	1
bear	1	2.75	Արջ	Western Armenian	3	3	1
bed	1	2.16667	Անկողին	Western Armenian	7	7	1
bell	1	2.66667	Զանգակ	Western Armenian	6	6	1
belt	1	3.70833	Գոտի	Western Armenian	4	4	1
bicycle	1	4.16667	Հեծանիւ	Western Armenian	7	7	1
bird	1	1.95833	Թռչուն	Western Armenian	6	6	0
blackboard	1	3.875	Գրատախտակ	Western Armenian	10	9	1
bone	1	4.29167	Ոսկոր	Western Armenian	6	5	0
bottle	1	2.625	Շիշ	Western Armenian	3	3	0
broom	1	3.79167	Աւել	Western Armenian	4	4	0
bus	1	4.66667	Փոխադրակառք	Western Armenian	11	11	1
butterfly	1	2.54167	Թիթեռնիկ	Western Armenian	8	8	0
button	1	3.79167	Կոճակ	Western Armenian	5	5	0
candle	1	2.58333	Մոմ	Western Armenian	3	3	0
car	1	2.75	Ինքնաշարժ	Western Armenian	9	9	0
carrot	1	2.79167	Ստեպղին	Western Armenian	8	7	0
cat	1	1.625	Կատու	Western Armenian	4	5	0
chain	1	5.29167	Շղթայ	Western Armenian	5	4	0
chair	1	1.75	Աթոռ	Western Armenian	4	4	0
cheese	1	2.54167	Պանիր	Western Armenian	5	5	0
clock	1	3.29167	Ժամացոյց	Western Armenian	7	8	1
cloud	1	2.79167	Ամպ	Western Armenian	3	3	0
comb	1	2.66667	Սանտր	Western Armenian	6	5	0
computer	1	5.70833	Համակարգիչ	Western Armenian	10	10	0
cow	1	2.33333	Կով	Western Armenian	3	3	0
crocodile	1	4.33333	Կոկորդիլոս	Western Armenian	9	9	0
cucumber	1	2.125	Վարունգ	Western Armenian	6	7	0
desk	1	4.875	Գրասեղան	Western Armenian	9	8	1
dog	1	1.625	Շուն	Western Armenian	3	3	0
doll	1	1.95833	Պուպրիկ	Western Armenian	6	7	0
door	1	1.875	Դուռ	Western Armenian	3	4	0
dress	1	2.25	Հագուստ	Western Armenian	6	7	0
drum	1	3.70833	Թմբուկ	Western Armenian	6	6	0
duck	1	2.41667	Բադիկ	Western Armenian	5	5	0
dummy	1	1.33333	Ծծակ	Western Armenian	5	4	0
ear	1	1.79167	Ականջ	Western Armenian	5	5	0
elephant	1	3.16667	Փիղ	Western Armenian	3	3	0
eye	1	1.70833	Աչք	Western Armenian	3	3	0
feather	1	4.75	Փետուր	Western Armenian	5	5	0
fish	1	2.29167	Ձուկ	Western Armenian	3	3	0
flag	1	3.79167	Դրօշակ	Western Armenian	6	6	0
flower	1	2.29167	Ծաղիկ	Western Armenian	5	5	0
fly	1	3.33333	Ճանճ	Western Armenian	4	4	0
fork	1	2.625	Պատառաքաղ	Western Armenian	9	9	1
frog	1	3.625	Գորտ	Western Armenian	4	4	0
frying pan	1	5.83333	Տապակ	Western Armenian	5	5	0
giraffe	1	5.25	Ընձուղտ	Western Armenian	6	7	0
glasses	1	2.58333	Ակնոց	Western Armenian	5	5	0
goat	1	4.125	Այծ	Western Armenian	3	3	0
guitar	1	4.70833	Կիթառ	Western Armenian	5	5	0
gun	1	4.375	Զէնք	Western Armenian	4	4	0
hat	1	2.16667	Գլխարկ	Western Armenian	7	6	0
heart	1	3.95833	Սիրտ	Western Armenian	4	4	0
helicopter	1	5.29167	Ուղղաթիռ	Western Armenian	6	7	1
Hen	1	2.375	Հաւ	Western Armenian	3	3	0
horse	1	2.66667	Ձի	Western Armenian	2	2	0
house	1	1.75	Տուն	Western Armenian	3	4	0
iron	1	4.5	Արդուկ	Western Armenian	5	6	0
key	1	2.70833	Բանալի	Western Armenian	6	6	0
knife	1	2.75	Դանակ	Western Armenian	5	5	0
lamp	1	5.54167	Լուսամփոփ	Western Armenian	8	9	1
leaf	1	3.29167	Տերեւ	Western Armenian	5	5	0
leg	1	1.83333	Ոտք	Western Armenian	4	3	0
lemon	1	3.41667	Լիմոն	Western Armenian	5	5	0
lion	1	2.95833	Առիւծ	Western Armenian	4	5	0
match	1	4.54167	Լուցկի	Western Armenian	5	6	0
monkey	1	2.70833	Կապիկ	Western Armenian	5	5	0
moon	1	2.625	Լուսին	Western Armenian	5	6	0
mouse	1	2.5	Մուկ	Western Armenian	3	4	0
mushroom	1	5.875	Սունկ	Western Armenian	4	5	0
needle	1	4.16667	Ասեղ	Western Armenian	4	4	0
nest	1	5	Բոյն	Western Armenian	3	4	0
newspaper	1	5.54167	Թերթ	Western Armenian	4	4	0
nose	1	1.70833	Քիթ	Western Armenian	3	3	0
onion	1	4.04167	Սոխ	Western Armenian	3	3	0
orange	1	2.29167	Նարինջ	Western Armenian	6	6	0
paintbrush	1	3.41667	Վրձին	Western Armenian	5	6	0
pear	1	2.875	Տանձ	Western Armenian	4	4	0
pen	1	4.75	Գրիչ	Western Armenian	5	4	0
pencil	1	2.33333	Մատիտ	Western Armenian	5	5	0
pineapple	1	6.41667	Արքայախնձոր	Western Armenian	11	11	1
pizza	1	3	Բիցցա	Western Armenian	4	4	0
postman	1	8.04167	Նամակաբաշխ	Western Armenian	8	8	1
rabbit	1	2.41667	Նապաստակ	Western Armenian	8	8	0
rainbow	1	5	Ծիածան	Western Armenian	6	7	0
ruler	1	4	Գծագաշ	Western Armenian	7	6	1
sandwich	1	2.66667	Սանտուիչ	Western Armenian	7	7	0
saw	1	5.66667	Սղոց	Western Armenian	5	4	0
scale	1	5.58333	Կշիռք	Western Armenian	6	5	0
scarf	1	4.91667	Վզկապ	Western Armenian	6	5	1
scissors	1	3.08333	Մկրատ	Western Armenian	6	5	0
sewing machine	1	5.83333	Կարի մեքենայ	Western Armenian	10	10	1
shirt	1	3.70833	Շապիկ	Western Armenian	5	5	0
shoe	1	2	Կօշիկ	Western Armenian	5	5	0
slide	1	2.45833	Սահնակ	Western Armenian	6	6	0
snail	1	4.45833	Խխունջ	Western Armenian	6	6	0
snake	1	3.58333	Օձ	Western Armenian	2	2	0
snowman	1	3.375	Ձիւնամարդ	Western Armenian	8	9	1
sock	1	2.375	Գուլպայ	Western Armenian	5	7	0
spoon	1	2.04167	Դգալ	Western Armenian	5	4	0
squirrel	1	4.95833	Սկիւռ	Western Armenian	5	5	0
stairs	1	3	Աստիճան	Western Armenian	7	7	0
star	1	3.08333	Աստղ	Western Armenian	4	4	0
strawberry	1	4.16667	Ելակ	Western Armenian	5	4	0
sun	1	2.20833	Արեւ	Western Armenian	4	4	0
sunglasses	1	4.125	Արեւու ակնոց	Western Armenian	10	10	1
swing	1	2.41667	Օրօրոց	Western Armenian	6	6	0
tail	1	3.91667	Պոչ	Western Armenian	3	3	0
tank	1	7.54167	Թանկ	Western Armenian	4	4	0
telephone	1	3.16667	Հեռաձայն	Western Armenian	7	8	1
television	1	3.91667	Հեռատեսիլ	Western Armenian	9	9	1
tennis ball	1	6.66667	Թենիսի գնդակ	Western Armenian	12	11	1
thermometer	1	5.54167	Ջերմաչափ	Western Armenian	8	8	1
tiger	1	3.625	Վագր	Western Armenian	5	4	0
tomato	1	2.20833	Լոլիկ	Western Armenian	5	5	0
toothbrush	1	3.20833	Ակռայի Վրձին	Western Armenian	12	11	1
tractor	1	5.79167	Թրաքթոր	Western Armenian	7	7	0
tree	1	2.375	Ծառ	Western Armenian	3	3	0
trousers	1	2.125	Տաբատ	Western Armenian	5	5	0
turtle	1	2.625	Կրիայ	Western Armenian	4	5	0
umbrella	1	2.95833	Հովանոց	Western Armenian	7	7	0
wardrobe	1	3.125	Պահարան	Western Armenian	4	4	0
watermelon	1	3	Ձմերուկ	Western Armenian	7	7	0
wave	1	4.41667	Ալիք	Western Armenian	4	4	0
whistle	1	3.83333	Սուլիչ	Western Armenian	5	6	0
bark	2	3.08333	Հաջել	Western Armenian	4	4	0
bath	2	2.20833	Լոգնալ	Western Armenian	5	6	0
beg	2	7.375	Մուրալ	Western Armenian	4	6	0
bite	2	2.66667	Խածնել	Western Armenian	5	5	0
blow	2	3.625	Փչել	Western Armenian	4	3	0
boil	2	6.16667	Եռալ	Western Armenian	3	3	0
brush [teeth]	2	3.29167	Վրձինել	Western Armenian	7	8	0
build	2	3.625	Շինել	Western Armenian	4	4	0
burn	2	3.875	Այրիլ	Western Armenian	3	4	0
burst	2	3.95833	Պայթիլ	Western Armenian	4	5	0
carry	2	3.125	Շալկել	Western Armenian	5	5	0
clap	2	3	Ծափահարել	Western Armenian	9	9	0
clean	2	3.16667	Սրբել	Western Armenian	5	4	0
climb	2	4.375	Մագլցիլ	Western Armenian	7	6	0
comb	2	2.875	Սանտրել	Western Armenian	6	6	0
cook	2	4.375	Եփել	Western Armenian	3	3	0
crawl	2	4.08333	Սողալ	Western Armenian	4	5	0
cry	2	1.75	Լալ	Western Armenian	2	3	0
cut	2	2.45833	Կտրել	Western Armenian	5	4	0
dance	2	2.29167	Պարել	Western Armenian	4	4	0
dig	2	4.45833	Փորել	Western Armenian	4	4	0
draw	2	2.54167	Գծել	Western Armenian	4	3	0
drill	2	4.875	Ծակել	Western Armenian	4	4	0
drink	2	1.75	Խմել	Western Armenian	4	3	0
drip	2	4.41667	Կաթիլ	Western Armenian	4	4	0
drive	2	3.125	Քշել	Western Armenian	4	3	0
drown	2	5.375	Խեղդուիլ	Western Armenian	7	7	0
dry	2	4.08333	Չորցնել	Western Armenian	7	6	0
eat	2	1.54167	Ուտել	Western Armenian	3	4	0
extinguish	2	3.25	Մարել	Western Armenian	4	4	0
fall	2	2.16667	Իյնալ	Western Armenian	3	5	0
feed	2	5.375	Կերակրել	Western Armenian	7	7	0
fight	2	3.5	Կռուիլ	Western Armenian	5	5	0
fish	2	5	Ձուկ որսալ	Western Armenian	8	9	1
fly	2	3.83333	Թռչիլ	Western Armenian	5	4	0
fry	2	5.375	Տապկել	Western Armenian	5	5	0
glue	2	3.54167	Փակցնել	Western Armenian	7	6	0
grill	2	6.375	Խորովել	Western Armenian	6	6	0
hammer	2	4.83333	Գամել	Western Armenian	4	4	0
hunt	2	5.625	Որսալ	Western Armenian	5	5	0
iron	2	5.25	Արդուկել	Western Armenian	6	7	0
jump	2	2.33333	Ցատկել	Western Armenian	5	5	0
kick	2	5.125	Կից զարնել	Western Armenian	8	8	1
kiss	2	4.54167	Համբուրել	Western Armenian	7	7	0
knit	2	6	Հիւսել	Western Armenian	4	5	0
knock	2	2.58333	Զարնել	Western Armenian	5	5	0
laugh	2	2.33333	Խնդալ	Western Armenian	5	5	0
lick	2	3.58333	Լզել	Western Armenian	4	3	0
light	2	3.91667	Վարել	Western Armenian	4	4	0
listen	2	2.375	Լսել	Western Armenian	4	3	0
marry	2	7.41667	Պսակուիլ	Western Armenian	7	7	0
massage	2	10.4167	Մարձել	Western Armenian	5	5	0
measure	2	5.29167	Չափել	Western Armenian	4	4	0
melt	2	4.375	Հալիլ	Western Armenian	4	4	0
milk	2	6.25	Կթել	Western Armenian	4	4	0
mix	2	3.20833	Խառնել	Western Armenian	5	5	0
mop	2	3.16667	Սրբել	Western Armenian	5	4	0
open	2	2.29167	Բանալ	Western Armenian	4	5	0
operate	2	7.95833	Գործողութիւն ընել	Western Armenian	13	15	1
pee	2	4.375	Միզել	Western Armenian	4	4	0
peel	2	4.41667	Կեղուել	Western Armenian	6	6	0
photograph	2	3.33333	Նկարել	Western Armenian	6	5	0
pick	2	4.54167	Քաղել	Western Armenian	4	4	0
pinch	2	5.625	Կսմռթել	Western Armenian	8	6	0
plant	2	4.20833	Ցանել	Western Armenian	4	4	0
play [the piano]	2	3.91667	Նուագել	Western Armenian	6	6	0
play golf	2	9	Կօլֆ խաղալ	Western Armenian	8	9	1
plow	2	7.08333	Հերկել	Western Armenian	5	5	0
pour	2	3.41667	Լեցնել	Western Armenian	6	5	0
pull	2	3.20833	Քաշել	Western Armenian	4	4	0
push	2	3	Հրել	Western Armenian	4	4	0
rain	2	3.08333	Անձրեւել	Western Armenian	7	7	0
read	2	3.66667	Կարդալ	Western Armenian	5	6	0
ride [a horse]	2	4.875	Հեծնալ	Western Armenian	5	5	0
ring	2	4.91667	Զանգել	Western Armenian	5	5	0
run	2	2.375	Վազել	Western Armenian	4	4	0
saw	2	6.25	Սղոցել	Western Armenian	6	5	0
sew	2	4.95833	Կարել	Western Armenian	4	4	0
sharpen	2	6.66667	Սրել	Western Armenian	4	3	0
shave	2	6.375	Ածիլուիլ	Western Armenian	6	6	0
sink	2	2.25	Երգել	Western Armenian	7	6	0
sit	2	1.75	Նստիլ	Western Armenian	5	4	0
sleep	2	2.20833	Քնանալ	Western Armenian	6	6	0
slide	2	2.70833	Սահիլ	Western Armenian	4	4	0
smell	2	2.83333	Հոտոտալ	Western Armenian	6	7	0
snow	2	4.04167	Ձիւնել	Western Armenian	4	5	0
spill	2	3	Թափիլ	Western Armenian	4	4	0
squeeze	2	4.5	Ճզմել	Western Armenian	5	4	0
steal	2	6.33333	Գողնալ	Western Armenian	5	6	0
sting	2	4.33333	Խայթել	Western Armenian	4	5	0
stroke	2	4.70833	Շոյել	Western Armenian	3	4	0
sweat	2	4.625	Քրտնիլ	Western Armenian	7	5	0
sweep	2	3.75	Աւլել	Western Armenian	4	4	0
swim	2	3.08333	Լողալ	Western Armenian	4	5	0
swing	2	2.58333	Օրօրուիլ	Western Armenian	6	7	0
talk [on the phone]	2	3.54167	Հեռաձայնել	Western Armenian	4	4	0
tear	2	3	Պատռել	Western Armenian	5	5	0
throw	2	2.41667	Նետել	Western Armenian	4	4	0
tie	2	3.5	Կապել	Western Armenian	4	4	0
type	2	7.08333	Տպել	Western Armenian	4	3	0
walk	2	1.95833	Քալել	Western Armenian	4	4	0
wash [clothes]	2	2.5	Լուալ	Western Armenian	4	5	0
watch [TV]	2	2.25	Դիտել	Western Armenian	4	4	0
water	2	4.66667	Ջրել	Western Armenian	4	3	0
wave	2	3.04167	Բարեւել	Western Armenian	6	6	0
weigh	2	5.54167	Կշռել	Western Armenian	5	4	0
whisper	2	4.58333	Փսփսալ	Western Armenian	7	6	0
whistle	2	4.41667	Սուլել	Western Armenian	4	5	0
wink	2	5.83333	Աչք ընել	Western Armenian	6	6	1
write	2	3.20833	Գրել	Western Armenian	4	3	0
